# Supplementary material for: Construction and validation of a prognostic risk model of angiogenesis factors in skin cutaneous melanoma
Source: publisher site journal article supplement (doi:10.18632/aging.203895), 2022-02-14
Supplement: Supplementary file [file aging-v14i3-203895-supplementary-material-SD1.pdf]

**SUPPLEMENTARY FIGURE**

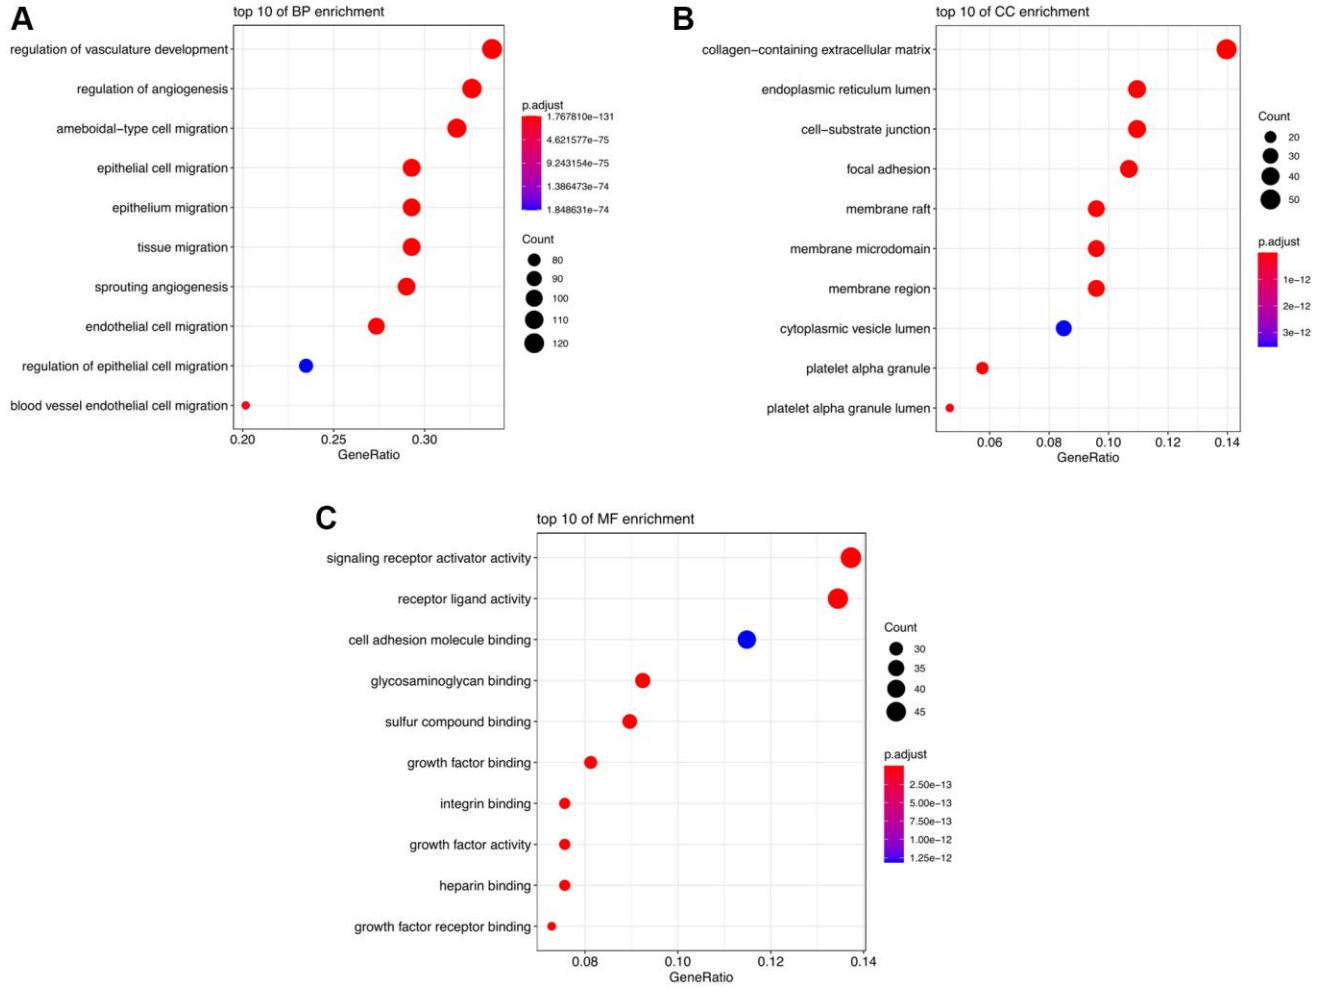

**Supplementary Figure 1. Functional annotation analysis of DE-AFs.** Gene Ontology (GO) enrichment analysis results show the top 10 terms (A) biological process (BP) enrichment, (B) cellular component (CC) enrichment and (C) molecular function enrichment (MF) enrichment.
