# Supplementary material for: Construction and validation of a prognostic risk model of angiogenesis factors in skin cutaneous melanoma
Source: Aging (Albany NY). 2022 Feb 14;14(3):1529–48. doi: 10.18632/aging.203895 (PMC8876895; doi:10.18632/aging.203895)
Supplement: Supplementary Table 1 [file aging-14-203895-s002.xlsx]

## Sheet: Sheet1
Supplementary Table 1. The clinical characteristics of melanoma patients from TCGA database.
ID	days_to_last_followup	vital_status	gender	height	history_of_neoadjuvant_treatment	melanoma_clark_level_value	melanoma_ulceration_indicator	new_tumor_dx_prior_submitted_specimen_dx	other_dx	pathologic_m	pathologic_n	pathologic_stage	pathologic_t	person_neoplasm_cancer_status	postoperative_rx_tx	primary_melanoma_at_diagnosis_count	primary_neoplasm_melanoma_dx	weight
TCGA-D3-A2JE-01A	841	dead	female	160	no			no	yes	m0	n3	stage iiic	tx	with tumor	no		yes	81
TCGA-D3-A2JF-01A	1888	alive	male	170	no	iii	no	yes	yes	m0	n0	stage ia	t1a	tumor free	no		yes	80
TCGA-D3-A3C8-01A	1409	alive	female	164	no			no	yes	m0	n3	stage iiic	tx	with tumor	no		yes	132
TCGA-D3-A3ML-01A	422	dead	male	178	yes	iv	no	yes	yes	m0	n2a	stage iiia	t3a	with tumor	no		yes	76
TCGA-D3-A51G-01A	0	alive	male	190	no			yes	yes	m0	n0	stage 0	tis	tumor free	yes		yes	112
TCGA-D3-A8GI-01A	1780	dead	male	183	no	iv	no	yes	yes	m0	n0	stage ia	t1a	with tumor	no		yes	88
TCGA-EB-A5SG-01A	2076	alive	female	162	no		no	yes	no					tumor free	no		yes	61
TCGA-EB-A5SH-01A	1643	alive	female	168	no	v	yes	no	no	m0	n0	stage iii	t4	tumor free	yes		yes	56
TCGA-EE-A180-01A	2889	dead	male		no	iv	no	yes	yes	m0	n0	stage iii	t4a	with tumor	no	1	yes
TCGA-EE-A184-01A	2073	dead	male		no	iv	no	yes	yes	m0	n0	stage ib	t2a		no		yes
TCGA-EE-A20H-01A	5118	dead	male		no	iii		yes	yes	m0	n0	stage i	t2	with tumor	no		yes
TCGA-EE-A29L-01A	79	dead	male		no	v	yes	no	yes	m0	n3	stage iiic	t4b		no		yes
TCGA-EE-A2GD-01A	10346	dead	female		no	iv	yes	yes	yes	m0	n0	stage iib	t4	with tumor	no		yes
TCGA-EE-A2GO-01A	3857	alive	female		no	iv	no	no	yes	m0	n0	stage ii	t3b	tumor free	no		yes
TCGA-EE-A2MR-01A	4088	alive	male		no	iii	no	no	yes	m0	n0	stage i	t2	tumor free	no		yes
TCGA-EE-A3JD-01A	832	dead	male		no			no	no	m0	n2b	stage iii	tx	with tumor	no		no
TCGA-ER-A193-01A	955	dead	male		no		no	no	yes	m0	n0	stage iib	t3b	with tumor	no	2	yes
TCGA-ER-A198-01A	1544	dead	male		no		yes	yes	yes	m0	nx			with tumor	yes	1	yes
TCGA-FR-A3YO-01A	0	alive	female	165	no				yes	m0	n0	i/ii nos	t2	with tumor	yes		yes	48
TCGA-FR-A729-01A	6716	alive	female	174	no	ii	no		no	m0	n0	stage i	t1	with tumor	yes		yes	83
TCGA-FS-A1ZF-01A	470	dead	female		no	iv	yes		yes	m0	n0	stage iic	t4b	with tumor	no	1	yes
TCGA-FW-A3R5-01A	1124	alive	male		no				yes	m0	n2	stage iii	tx	tumor free	yes	1	yes
TCGA-QB-AA9O-01A	549	dead	male	180	no				yes	m0	n3	stage iiic	tx	with tumor	yes		no	119
TCGA-WE-A8K4-01A	614	alive	male		no				yes	m0	nx	stage iib	t4a	tumor free	no	1	yes
TCGA-WE-A8K5-01A	1860	dead	male		no	iii	no		yes	m1c	n3	stage iv	t2a	with tumor	no	1	yes
TCGA-WE-AAA3-01A	651	alive	female		no		yes		yes	m0	n2b	stage iiic	t4b	tumor free	no	1	yes
TCGA-3N-A9WB-01A	518	dead	male	175	no	iii	no	no	no	m0	nx	stage ia	t1a	with tumor	no		yes	78
TCGA-3N-A9WC-01A	2022	alive	male	183	no	iv	yes	no	no	m0	nx	stage iia	t2b	with tumor	no	1	yes	68
TCGA-3N-A9WD-01A	395	dead	male	183	no	iii	no	no	no	m0	n1a	stage iiia	t2a	with tumor	no	1	yes	116
TCGA-BF-A1PU-01A	387	alive	female	160	no	iii	yes	no	no	m0	n0	stage iic	t4b	tumor free	no	1	yes	58
TCGA-BF-A1PV-01A	14	alive	female	160	no	iv	yes		no	m0	n0	stage iic	t4b	tumor free		1	yes	70
TCGA-BF-A1PX-01A	282	dead	male	175	no	iii	yes		no	m0	n2a	stage iiib	t4b	tumor free	no	1	yes	78
TCGA-BF-A1PZ-01A	853	alive	female	163	no	iii	no		no	m0	n0	stage iib	t4a	tumor free	no	1	yes	56
TCGA-BF-A1Q0-01A	831	alive	male	173	no	iii	yes		no	m0	n0	stage iic	t4b	tumor free	no	1	yes	69
TCGA-BF-A3DJ-01A	464	alive	female	165	no	iii	yes	no	no	m0	n1	stage iiib	t4b	tumor free	no	1	yes	70
TCGA-BF-A3DL-01A	769	alive	female	158	no	iv	yes		no	m0	n2	stage iiib	t3b	tumor free	no	1	yes	62
TCGA-BF-A3DM-01A	601	alive	male	172	no	v	yes		no	m0	n0	stage iia	t2b	tumor free	no	1	yes	97
TCGA-BF-A3DN-01A	717	alive	female	157	no	iv	yes		no	m0	n3	stage iiic	t3b	tumor free	no	1	yes	58
TCGA-BF-A5EO-01A	703	alive	male	182	no	iii	yes		no	m0	n0	stage iic	t4b	tumor free	no	1	yes	110
TCGA-BF-A5EP-01A	335	alive	female	165	no	v	yes		no	m0	n3	stage iiic	t4b	tumor free	no	1	yes	83
TCGA-BF-A5EQ-01A	323	alive	male	178	no	iii			no	m0	n0	stage iic	t4b	tumor free	no	1	yes	90
TCGA-BF-A5ER-01A	327	alive	male	180	no	iv	yes		no	m0	n0	stage iic	t4b	tumor free	no	1	yes	93
TCGA-BF-A5ES-01A	490	alive	female	160	no	iv	yes		no	m0	n0	stage iic	t4b	tumor free	no	1	yes	56
TCGA-BF-A9VF-01A	440	alive	male	174	no	iii	yes		no	m0	n0	stage iic	t4b	tumor free	no	1	yes	77
TCGA-BF-AAOU-01A	476	alive	female	160	no	iv	yes		no	m0	n0	stage iic	t4b	tumor free	no	1	yes	50
TCGA-BF-AAOX-01A	444	alive	male	175	no	iv	yes		no	m0	n0	stage iic	t4b	tumor free	no	1	yes	80
TCGA-BF-AAP0-01A	454	alive	female	170	no				no	m1	nx	stage iv	t4	tumor free	no	1	yes	57
TCGA-BF-AAP1-01A	409	alive	male	167	no	iv	yes		no	m0	n0	stage iic	t4b	tumor free	no	1	yes	68
TCGA-BF-AAP2-01A	405	alive	male	173	no	iii	yes		no	m0	n0	stage iib	t3b	tumor free	no	1	yes	75
TCGA-BF-AAP4-01A	335	alive	male	176	no	v	yes		no	m0	n0	stage iic	t4b	tumor free	no	1	yes	86
TCGA-BF-AAP6-01A	325	alive	male	170	no	iv	yes		no	m0	n2	stage iii	t4b	tumor free	no	1	yes	75
TCGA-BF-AAP7-01A	318	alive	female	158	no	iv	yes		no	m0	n0	stage iic	t4b	tumor free	no	1	yes	67
TCGA-BF-AAP8-01A	447	alive	male	159	no	iv	yes		no	m0	n0	stage iic	t4b	tumor free	no	1	yes	65
TCGA-D3-A1Q1-01A	504	dead	female	162	no	ii	no	no	no	m0	n3	stage iiic	t1b	with tumor	yes		yes	59
TCGA-D3-A1Q3-01A	507	dead	male	182	yes		yes		no	m0	n0	stage iic	t4b	with tumor	yes		yes	108
TCGA-D3-A1Q4-01A	3408	alive	female	155	no	iv	yes		no	m0	n1b	stage iiic	t2b	tumor free	no		yes	83
TCGA-D3-A1Q5-01A	3424	dead	male	179	no			no	no	m0	n0	i/ii nos	tx		no		yes	125
TCGA-D3-A1Q6-01A	2184	dead	male	175	no	v		yes	no	m0	n1b	stage iii	t4	tumor free	yes		yes	81
TCGA-D3-A1Q7-01A	4053	alive	female	170	no	iii	no	no	no	m0	n0	stage ib	t1b	tumor free	no		yes	79
TCGA-D3-A1Q8-01A	854	dead	male	187	no			no	no	m1b	n3	stage iv	t0	with tumor	no		no	161
TCGA-D3-A1Q9-01A	961	dead	male	177	no	v	yes	yes	no	m0	n2a	stage iiib	t4b	with tumor	yes		yes	98
TCGA-D3-A1QA-01A	2765	alive	male	175	no	iii	no	no	no	m0	n0	stage ib	t2a	with tumor	no		yes	90
TCGA-D3-A1QB-01A	2912	alive	female	147	no			yes	no	m0	n2c	stage iii	t0	tumor free	no		no	86
TCGA-D3-A2J6-01A	1321	dead	male	185	no	iv	yes	yes	no	m0	n0	stage iib	t3b	with tumor	no		yes	141
TCGA-D3-A2J7-01A	3136	dead	male	175	no	iii	yes	yes	no	m0	n1b	stage iiic	t3b	with tumor	no		yes	93
TCGA-D3-A2J8-01A	1992	dead	male	183	no	iv	no	no	no	m0	n0	stage ib	t2a	with tumor	no		yes	79
TCGA-D3-A2J9-01A	723	dead	male	183	no	v	yes	no	no	m0	n3	stage iiic	t4b	with tumor	no	2	yes	70
TCGA-D3-A2JA-01A	3514	alive	male	175	no	iii	no	yes	no	m0	n1a	stage iiia	t2a	tumor free	no		yes	113
TCGA-D3-A2JB-01A	5110	dead	female	163	no			no	no	m0	n0	stage 0	tis	tumor free	no		yes	57
TCGA-D3-A2JC-01A	2639	alive	female	168	no				no	m0	n2b	stage iii	t0	tumor free	yes		no	83
TCGA-D3-A2JD-01A	361	dead	male	183	no	v	yes	no	no	m0	n1b	stage iiic	t4b	with tumor	no		yes	73
TCGA-D3-A2JG-01A	3453	dead	female	165	yes	iv	no	no	no	m0	n1a	stage iiia	t3a	with tumor	no		yes	89
TCGA-D3-A2JH-01A	1280	alive	male	175	no	ii	no	no	no	m0	n0	stage ib	t1b	tumor free	yes		yes	123
TCGA-D3-A2JK-01A	368	dead	male	185	no	iv	yes	no	no	m0	n2b	stage iiic	t4b	with tumor	no		yes	92
TCGA-D3-A2JL-01A	5219	alive	female	165	no			no	no	m0	n0	i/ii nos	tx	tumor free	yes		yes	72
TCGA-D3-A2JN-01A	2022	dead	female	163	no				no	m0	n1b	stage iii	t0	tumor free	no		no	76
TCGA-D3-A2JO-01A	2010	alive	female	174	no		yes	yes	no	m0	n3	stage iiic	tx	with tumor	no		yes	77
TCGA-D3-A2JP-01A	1812	alive	male	175	no			no	no	m0	n3	stage iiic	t0	with tumor	no		no	75
TCGA-D3-A3BZ-01A	3976	alive	male	170	no	v	no	no	no	m0	n0	stage iib	t4a	tumor free	no		yes	99
TCGA-D3-A3C1-01A	0	alive	male	179	no			no	no	m0	n0	i/ii nos	tx	with tumor	yes		yes	83
TCGA-D3-A3C3-01A	0	alive	female	170	no			no	no	m0	n0	i/ii nos	tx	with tumor	no		yes	80
TCGA-D3-A3C6-01A	1766	dead	female	165	no	iv	no	no	no	m0	n0	stage ib	t2a	with tumor	no		yes	85
TCGA-D3-A3C7-01A	1429	alive	female	162	no				no	m0	n1b	stage iii	t0	tumor free	yes		no	72
TCGA-D3-A3CB-01A	5065	alive	male	173	no	iii			no	m0	n0	i/ii nos	t2	tumor free	no		yes	86
TCGA-D3-A3CC-01A	2644	alive	female	164	yes	v	yes	yes	no	m0	n0	stage iic	t4b	with tumor	no		yes	87
TCGA-D3-A3CE-01A	1832	dead	female	165	no			yes	no	m0	n1b	stage iii	t0	with tumor	no		no	75
TCGA-D3-A3CF-01A	746	dead	female	162	no	v	yes	no	no	m0	n3	stage iiic	t4b	with tumor	no		yes	129
TCGA-D3-A3MO-01A	284	dead	male	178	no			no	no	m0	n2c	stage iii	tx	with tumor	no		yes	70
TCGA-D3-A3MR-01A	3151	alive	male	180	no				no	m0	n1b	stage iii	t0	tumor free	no		no	86
TCGA-D3-A3MU-01A	1209	alive	male	181	yes	iv	no	no	no	m0	n2a	stage iiia	t3a	with tumor	no		yes	110
TCGA-D3-A3MV-01A	1378	alive	female	156	no	iv	yes	yes	no	m0	n2a	stage iiib	t2b	tumor free	yes		yes	135
TCGA-D3-A51E-01A	5318	alive	female	163	no	iii			no	m0	n0	i/ii nos	t2	tumor free	yes		yes	61
TCGA-D3-A51F-01A	1695	alive	male	187	no	iv	yes		no	m0	n1b	stage iiic	t4b	tumor free	no		yes	90
TCGA-D3-A51H-01A	1714	alive	male	183	no	iv	yes	no	no	m0	n3	stage iiic	t1b	tumor free	yes		yes	78
TCGA-D3-A51J-01A	4414	alive	male	185	yes			yes	no	m0	n1b	stage iii	t0	tumor free	no		no	126
TCGA-D3-A51K-01A	1002	alive	male	173	no				no	m0	n2b	stage iiib	tis	tumor free	no		yes	90
TCGA-D3-A51N-01A	688	alive	female	163	no				no	m1c	n3	stage iv	t0	with tumor	no		no	84
TCGA-D3-A51R-01A	1941	alive	male	181	no	iv	no	no	no	m0	n0	stage iia	t3a	with tumor	no		yes	72
TCGA-D3-A51T-01A	818	alive	female	152	no	iv	yes	no	no	m0	n1b	stage iiic	t4b	tumor free	no		yes	92
TCGA-D3-A5GL-01A	3826	alive	male	185	no	iv	no	no	no	m0	n0	stage ib	t2a	tumor free	no		yes	113
TCGA-D3-A5GN-01A	4129	alive	female	167	yes	iii		yes	no	m0	n0	stage i	t1	tumor free	no		yes	68
TCGA-D3-A5GO-01A	4195	alive	male	169	no	v		yes	no	m0	n0	stage ii	t4	tumor free	no		yes	83
TCGA-D3-A5GR-01A	5424	alive	female	162	yes	iii		yes	no	m0	n1	stage iii	t1b	with tumor	no		yes	114
TCGA-D3-A5GS-01A	553	alive	male	172	no	ii	no	no	no	m1c	n1b	stage iv	t1b	with tumor	no		yes	99
TCGA-D3-A5GT-01A	487	alive	male	155	no	iv	yes		no	m0	n3	stage iiic	t2b	with tumor	yes		yes	79
TCGA-D3-A5GU-01A	3808	alive	male	177	no	iii	no	yes	no	m0	n0	stage ib	t1b	with tumor	no		yes	75
TCGA-D3-A8GB-01A	938	dead	male	183	no	iv	no	no	no	m0	n1b	stage iiib	t3a	with tumor	yes		yes	89
TCGA-D3-A8GC-01A	2421	dead	male	180	yes			no	no	m0	n3	stage iiic	tx	with tumor	no		no	114
TCGA-D3-A8GD-01A	718	alive	female	168	no	iv	yes	no	no	m0	n3	stage iiic	t4b	tumor free	no		yes	79
TCGA-D3-A8GE-01A	804	alive	male	176	no			no	no	m1b	n0	stage iv	tx	with tumor	no		no	97
TCGA-D3-A8GJ-01A	7342	alive	male	192	no	iii		yes	no	m0	n0	stage ii	t3	tumor free	no		yes	85
TCGA-D3-A8GK-01A	5177	alive	male	178	no	iv	no	yes	no	m0	n0	stage iia	t3a	tumor free	yes		yes	80
TCGA-D3-A8GL-01A	2711	dead	male	183	yes	iv	no	yes	no	m0	n1b	stage iiib	t2a	with tumor	no		yes	107
TCGA-D3-A8GM-01A	3259	dead	male	168	no	iv	yes		no	m0	n0	stage iib	t3b	tumor free	no		yes	75
TCGA-D3-A8GN-01A	4897	alive	female	165	yes			yes	no	m0	n0	i/ii nos	tx	tumor free	yes		no	64
TCGA-D3-A8GO-01A	0	dead	female	167	no	iii		no	no	m0	n0	i/ii nos	t2	with tumor	no		yes	69
TCGA-D3-A8GP-01A	4646	alive	male	175	no	iv		yes	no	m0	n2c	stage iii	t2	tumor free	no		yes	72
TCGA-D3-A8GQ-01A	884	dead	male	174	no	iii		no	no	m0	n0	stage ii	t3	with tumor	no		yes	82
TCGA-D3-A8GR-01A	3943	dead	female	168	no			no	no	m0	n0	stage 0	tis	with tumor	no		yes	84
TCGA-D3-A8GS-01A	3564	dead	male	181	no	iii		yes	no	m0	n0	stage i	t1	with tumor	no		yes	111
TCGA-D3-A8GV-01A	5101	dead	male	182	yes			yes	no	m0	n0	i/ii nos	tx	with tumor	no		yes	102
TCGA-D9-A148-01A	4609	alive	male	179	no		no		no	m1b	n3		tx	with tumor	yes		yes	84
TCGA-D9-A149-01A	1663	alive	female	164	no		no		no	m0	n1b		tx	tumor free	no		yes	87
TCGA-D9-A1JW-01A	111	alive	male	160	no		no		no	m0	n2a		t1a	tumor free	no		yes	86
TCGA-D9-A1JX-01A	216	dead	female	160	no	iii	no		no	m0	nx		tx	with tumor	no		yes	86
TCGA-D9-A1X3-01A	551	alive	male	170	no	v	yes	no	no		n2b		t4b	with tumor	no		yes	95
TCGA-D9-A3Z1-01A	468	dead	male	180	no	iv			no	m0	n3	stage iiic	t2a	with tumor	no	1	yes	80
TCGA-D9-A3Z3-01A	678	alive	female	164	no	iv	no		no	m0	n1b	stage iiib	t3a	tumor free	no	1	yes	61
TCGA-D9-A3Z4-01A	519	dead	male	175	no	v	yes		no	m0	n3	stage iiic	t4b	with tumor	no	1	yes	90
TCGA-D9-A4Z2-01A	190	dead	male	164	no	iv	yes	no	no	m0	n3	stage iiic	t4b	with tumor	no	2	yes	54
TCGA-D9-A4Z3-01A	505	alive	female	170	no	v	yes		no	m0	n1b	stage iiic	t4b	tumor free	no	1	yes	70
TCGA-D9-A4Z5-01A	218	alive	male	176	no	iii	no		no	m0	n0	stage iib	t4a	tumor free	no	1	yes	112
TCGA-D9-A4Z6-01A	561	dead	male	178	no				no	m0	n1b	stage iiic	t3b	with tumor	no	1	yes	88
TCGA-D9-A6E9-01A	301	alive	female	165	no	iv	no		no	m0	n1	stage iiia	t3a	tumor free	no	1	yes	89
TCGA-D9-A6EA-01A	766	alive	male	166	no	iv	no		no	m0	n3	stage iiic	t4a	tumor free	no	1	yes	58
TCGA-D9-A6EC-01A	2359	alive	male	175	no	iii	no		no	m0	n1	stage iiia	t3a	tumor free	no		yes	130
TCGA-D9-A6EG-01A	698	dead	male	165	no	iv	yes	no	no	m0	n1	stage iiia	t4a		no		yes	70
TCGA-DA-A1HV-01A	2329	alive	female		no				no	m0	n2b	stage iiib	t0	tumor free	no		no
TCGA-DA-A1HW-01A	1096	dead	female		no	iii	no		no	m0	n1b	stage iiib	t1a	tumor free	no	1	yes	69
TCGA-DA-A1HY-01A	4407	alive	male	178	no	iv	yes		no	m0	n1	stage iii	t2b	tumor free	no	1	yes	80
TCGA-DA-A1I0-01A	620	dead	male		no	iv	yes		no	m1a	n3	stage iv	t4b	with tumor	no	1	yes
TCGA-DA-A1I1-01A	6768	alive	male		no				no	m0	n2a	stage iii	t0	tumor free	no		no
TCGA-DA-A1I2-01A	5370	dead	male		no	iv	yes		no	m0	n2b	stage iii	t4b	with tumor	no	1	yes	92
TCGA-DA-A1I4-01A	1093	dead	male	170	no	iv	yes		no	m0	n2b	stage iiic	t3b	with tumor	no	1	yes	72
TCGA-DA-A1I5-01A	4107	alive	female		no	iv	no		no	m1c	n0	stage iv	t1a	tumor free	no	1	yes
TCGA-DA-A1I7-01A	2703	alive	male	193	no			no	no	m0	n2b	stage iiib	t0	with tumor	no		no	87
TCGA-DA-A1I8-01A	1640	dead	female	168	no	iv	yes		no	m0	n0	stage iic	t4b	with tumor	no	1	yes	71
TCGA-DA-A1IA-01A	2005	dead	female		no	iv	no		no	m0	n1b	stage iiib	t2a	with tumor	no	1	yes
TCGA-DA-A1IB-01A	1235	dead	female		no	iv	yes		no	m0	n2b	stage iiic	t2b	with tumor	no		yes
TCGA-DA-A1IC-01A	2071	dead	male	175	no	iv	no		no	m0	n2c	stage iiib	t3a	with tumor	no	1	yes	81
TCGA-DA-A3F2-01A	1032	dead	male		no	v	no		no	m0	n2b	stage iiib	t4a	with tumor	no	1	yes	87
TCGA-DA-A3F3-01A	319	dead	male		no				no	m0	n2b	stage iiib	t0	with tumor	no		no
TCGA-DA-A3F5-01A	6873	dead	male		no	iii			no	m0	n0	stage i	t1a	with tumor	no	1	yes
TCGA-DA-A3F8-01A	1319	alive	male		no	iv	no		no	m0	n2b	stage iiib	t2a	tumor free	no	1	yes
TCGA-DA-A95V-01A	2193	alive	female		no	iv	yes	no	no		n0	stage iic	t4b	tumor free	no		yes
TCGA-DA-A95W-01A	1136	alive	male		no				no	m0	n1b	stage iiib	tx	tumor free	no		no
TCGA-DA-A95X-01A	2249	alive	male		no	iv	no	no	no	m0	n0	stage ib	t2a	tumor free	no		yes
TCGA-DA-A95Y-01A	430	dead	male		no	iv	yes	no	no	m0	n0	stage iic	t4b	with tumor	no		yes
TCGA-DA-A95Z-01A	396	alive	male		no			no	no	m1a	n0	stage iv	tx	tumor free	no		no
TCGA-DA-A960-01A	804	alive	male		no	iv	yes	no	no	m0	n0	stage iib	t3b	tumor free	no	1	yes
TCGA-EB-A1NK-01A	1039	alive	male	184	no	iv	yes		no	m0	n0	stage iic	t4b	tumor free	no		yes	132
TCGA-EB-A24C-01A	632	alive	male	180	no		yes		no	m0	nx		t4b	tumor free	yes		yes	74
TCGA-EB-A24D-01A	645	alive	male	175	no		no		no	m0	n2b	stage iiib	t4a	tumor free	yes		yes	86
TCGA-EB-A299-01A	378	alive	male	170	no	iii	yes		no	m0	n0	stage iia	t2b	tumor free	no		yes	90
TCGA-EB-A3HV-01A	39	alive	male	180	no	iv	yes		no	m0	n0	stage iic	t4b	with tumor			yes	69
TCGA-EB-A3XB-01A	796	alive	male	164	no	iv			no	m0	nx	stage ii	t4	tumor free	no		yes	80
TCGA-EB-A3XC-01A	650	alive	male	178	no		yes		no	m0	n0	stage iic	t4b	tumor free	no	1	yes	70
TCGA-EB-A3XD-01A	1160	alive	female	164	no				no	m0	nx	stage iic	t4b	tumor free	no	1	yes	80
TCGA-EB-A3XE-01A	180	alive	female	158	no		no		no	m0	n0	stage iia	t3a	tumor free	no	1	yes	62
TCGA-EB-A3XF-01A	278	alive	male	182	no		yes		no	m0	n0	stage iic	t4b	tumor free	no		yes	88
TCGA-EB-A3Y6-01A	126	alive	female	168	no		yes		no	m0	n0	stage iic	t4b	tumor free	yes		yes	65
TCGA-EB-A3Y7-01A	326	dead	female	146	no		no		no	m0	n2c	stage iiib	t3a	tumor free	no		yes	55
TCGA-EB-A41A-01A	262	alive	male	162	no		yes		no	m0	n0	stage iic	t4b	tumor free	no		yes	63
TCGA-EB-A41B-01A	291	alive	female	150	no	v	yes		no	m0	n0	stage iic	t4b	tumor free	no		yes	53
TCGA-EB-A42Y-01A	721	dead	female	152	no		yes		no	m0	n0	stage iic	t4b	with tumor	no		yes	43
TCGA-EB-A42Z-01A	441	alive	male	165	no		yes		no	m0	n1b	stage iiic	t4b	tumor free	no		yes	50
TCGA-EB-A430-01A	-2	alive	male	168	no	iv	yes		no	m0	n0	stage iic	t4b	tumor free	no		yes	85
TCGA-EB-A431-01A	568	alive	male	170	no	iii	yes		no	m0	n0	stage iic	t4b	tumor free	no		yes	62
TCGA-EB-A44N-01A	205	dead	male	183	no	iii	yes		no	m0	n0	stage iic	t4b	with tumor	no		yes	70
TCGA-EB-A44O-01A	81	alive	male	182	no		no		no	m0	n0	stage iib	t4a	with tumor	no		yes	89
TCGA-EB-A44P-01A	741	alive	female	164	no		no		no	m0	n0	stage iic	t4b	tumor free	no		yes	68
TCGA-EB-A44Q-01A	422	alive	female	154	no		yes		no	m0	n3	stage iiic	tx	tumor free			yes	47
TCGA-EB-A44R-01A	315	dead	male	164	no				no	m0	n2b	stage iiib	tx	tumor free	no	1	yes	53
TCGA-EB-A4IQ-01A	636	dead	female	150	no		yes		no	m0	n1	stage iiib	t4b	tumor free			yes	40
TCGA-EB-A4IS-01A	774	alive	male	155	no		yes		no	m0	nx	stage iib	t3b	tumor free	no		yes	80
TCGA-EB-A4OY-01A	977	alive	female	172	no	v			no	m0	n1a	stage iiib	t4b	tumor free	yes		yes	87
TCGA-EB-A4OZ-01A	620	alive	female	170	no	v	no		no	m0	n3	stage iiic	t4a	tumor free	yes		yes	80
TCGA-EB-A4P0-01A	326	dead	male	178	no	iv	yes		no	m0	n0	stage iic	t4b	tumor free	no		yes	76
TCGA-EB-A4XL-01A	777	alive	female	168	no	iv	yes		no	m0	nx	stage iic	t4b	tumor free	no	1	yes	52
TCGA-EB-A51B-01A	931	alive	male	173	no	iii	yes		no	m0	nx	stage iic	t4b	tumor free	no		yes	94
TCGA-EB-A550-01A	264	dead	female	158	no	iv	yes		no	m0	nx	stage iic	t4b	tumor free	yes		yes	70
TCGA-EB-A551-01A	590	alive	female	172	no	v	yes		no	m0	n2b	stage iiic	t4b	tumor free	no		yes	65
TCGA-EB-A553-01A	226	alive	male	164	no		yes		no	m0	n0	stage iic	t4b	tumor free	yes		yes	74
TCGA-EB-A57M-01A	472	dead	male	168	no		yes		no	m0	n1	stage iiib	t4b	tumor free	yes	1	yes	61
TCGA-EB-A5FP-01A	454	dead	female	180	no		yes		no	m1b	nx	stage iv	t4b	with tumor	no	1	yes	82
TCGA-EB-A5KH-01A	619	dead	male	172	no				no	m0	n1	stage iii	t0	tumor free	yes	1	yes	62
TCGA-EB-A5SE-01A	401	dead	male	183	no	iv	yes		no	m0	nx	stage iib	t3b	with tumor	no	1	yes	77
TCGA-EB-A5SF-01A	369	dead	female	161	no	v	yes		no	m0	nx	stage iic	t4b	tumor free	no		yes	57
TCGA-EB-A5UL-01A	891	alive	male	183	no				no	m0	n1	stage iii	tx	tumor free	yes	1	yes	80
TCGA-EB-A5UM-01A	779	alive	female	162	no		yes		no	m0	n0	stage iic	t4b	tumor free	no		yes	60
TCGA-EB-A5UN-01A	1792	alive	male	180	no	iv	yes		no	m0	nx	stage iic	t4b	tumor free	no	1	yes	62
TCGA-EB-A5VU-01A	321	dead	male	160	no		yes		no	m0	n1	stage iiib	t4b	with tumor	no	1	yes	60
TCGA-EB-A5VV-01A	214	alive	female	160	no		yes	no	no	m0	n1	stage iiib	t3b	tumor free	no	1	yes	96
TCGA-EB-A6L9-01A	1109	alive	male	156	no		yes		no	m0	n3	stage iiic	tx	tumor free	no		yes	58
TCGA-EB-A6QY-01A	382	alive	male	169	no		yes		no	m0	n0	stage iic	t4b	tumor free	no		yes	97
TCGA-EB-A6QZ-01A	352	dead	female	162	no		no		no	m0	n0	stage iia	t3a	with tumor	no		yes	60
TCGA-EB-A6R0-01A	608	dead	female	160	no	iv	yes		no	m0	n0	stage iic	t4b	tumor free	yes		yes	115
TCGA-EB-A82B-01A	390	alive	female	160	no	v	yes		no	m0	n2	stage iii	t4b	tumor free	no		yes	55
TCGA-EB-A82C-01A	17	alive	female	150	no	v	yes		no	m0	n0	stage iic	t4b	tumor free			yes	42
TCGA-EB-A85I-01A	362	alive	male	170	no		yes		no	m0	n0	stage iic	t4b	tumor free	no	1	yes	82
TCGA-EB-A85J-01A	360	alive	female	166	no		no		no	m0	n0	stage iib	t4a	tumor free	yes	1	yes	128
TCGA-EB-A97M-01A	414	alive	male	171	no	iv	yes		no	m0	n0	stage iic	t4b	tumor free	no		yes	68
TCGA-EE-A17X-01A	907	dead	male		no	iii	no	yes	no	m0	n0	stage ia	t1a	with tumor	no		yes
TCGA-EE-A17Y-01A	828	dead	male		no	iv	yes	yes	no	m0	n1a	stage iiib	t3b	with tumor	no		yes
TCGA-EE-A17Z-01A	263	dead	male		no	v	no	no	no	m0	n0	stage iib	t4a	with tumor	no		yes
TCGA-EE-A181-01A	1026	dead	female		no	iv		yes	no	m0	n0	stage ii	t3	tumor free	no		yes
TCGA-EE-A182-01A	447	dead	female		no	v	yes	yes	no	m0	n1b	stage iiic	t4b	with tumor	no		yes
TCGA-EE-A183-01A	818	dead	male		no			no	no	m0	n0	stage 0	tis	with tumor	no		yes
TCGA-EE-A185-01A	151	dead	female		no	iv	yes	no	no	m0	n3	stage iiic	t4b	with tumor	no		yes
TCGA-EE-A20B-01A	4070	alive	female		no	iii			no	m0	n0	stage ii	t3	tumor free	no		yes
TCGA-EE-A20C-01A	4601	dead	male		no			yes	no	m0	n0	stage 0	tis	with tumor	no		yes
TCGA-EE-A20F-01A	2785	alive	male		no				no	m0	n0	stage i	t1	tumor free	no		yes
TCGA-EE-A20I-01A	412	dead	male		no		yes	yes	no	m1c	n0	stage iv	tx	with tumor	no		yes
TCGA-EE-A29A-01A	1927	dead	male		no	iv	no	yes	no	m0	n1a	stage iiia	t3a	with tumor	no		yes
TCGA-EE-A29B-01A	2588	dead	male		no	iii	yes	yes	no	m0	n0	stage iib	t3b	with tumor	no		yes
TCGA-EE-A29C-01A	2402	dead	male		no	iv	no	yes	no	m0	n0	stage ib	t2a	with tumor	no		yes
TCGA-EE-A29D-01A	425	dead	male		no	iv	yes		no	m0	n1b	stage iiic	t3b		no		yes
TCGA-EE-A29E-01A	1940	alive	male		no	iv	no		no	m0	n1b	stage iiib	t3a	tumor free	no		yes
TCGA-EE-A29G-01A	2192	dead	male		no	v	no	yes	no	m0	n2a	stage iiia	t4a	with tumor	no		yes
TCGA-EE-A29H-01A	1966	alive	female		no	ii	no		no	m0	n0	stage ia	t1a	tumor free	yes		yes
TCGA-EE-A29M-01A	1729	alive	female		no	iii	no		no	m0	n0	stage ib	t2a	tumor free	no		yes
TCGA-EE-A29N-01A	566	dead	male		no			no	no	m0	n0	i/ii nos	tx	with tumor	no		yes
TCGA-EE-A29P-01A	1716	alive	female		no	iv	yes	no	no	m0	n0	stage iic	t4b	with tumor	no		yes
TCGA-EE-A29Q-01A	2030	dead	female		no	iv	yes		no	m0	n0	stage iib	t3b	with tumor	no		yes
TCGA-EE-A29R-01A	440	alive	female		no	v	yes	no	no	m0	n1b	stage iiic	t3b	with tumor	no		yes
TCGA-EE-A29S-01A	1864	dead	male		no	iv	no	no	no	m0	n0	stage iia	t3a	with tumor	no		yes
TCGA-EE-A29T-01A	11252	alive	female		no			yes	no	m0	nx		tx	tumor free	no		yes
TCGA-EE-A29V-01A	787	dead	male		no	iv	yes	yes	no	m0	n1b	stage iiic	t3b	with tumor	yes		yes
TCGA-EE-A29W-01A	5932	alive	male		no			yes	no	m0	n0	stage 0	tis	tumor free	no		yes
TCGA-EE-A29X-01A	545	dead	female		no	iv	no	no	no	m0	n0	stage ib	t2a	with tumor	no		yes
TCGA-EE-A2A0-01A	1424	dead	female		no	iv	no	no	no	m0	n0	stage iia	t3a	with tumor	no		yes
TCGA-EE-A2A1-01A	3527	alive	male		no	iv	no		no	m0	n0	stage ib	t2a	tumor free	no		yes
TCGA-EE-A2A2-01A	1814	alive	male		no	iv	yes		no	m0	n1b	stage iiic	t4b	tumor free	no		yes
TCGA-EE-A2A5-01A	1195	dead	male		no	iv	no	no	no	m0	n0	stage ib	t2a	with tumor	no		yes
TCGA-EE-A2A6-01A	2620	alive	male		no	ii	no	yes	no	m0	n0	stage ia	t1a	tumor free	no		yes
TCGA-EE-A2GB-01A	1803	alive	male		no	iii	yes		no	m0	n1a	stage iiib	t2b	tumor free	no		yes
TCGA-EE-A2GC-01A	2051	alive	male		no	iii	yes		no	m0	n0	stage iib	t3b	tumor free	no		yes
TCGA-EE-A2GE-01A	5286	alive	male		no	iii	no		no	m0	n0	stage i	t2	tumor free	no		yes
TCGA-EE-A2GH-01A	6699	alive	male		no	iii			no	m0	n0	stage i	t2	tumor free	yes		yes
TCGA-EE-A2GI-01A	1482	alive	male		no	iii	no		no	m0	n0	stage ia	t1a	tumor free	yes		yes
TCGA-EE-A2GJ-01A	3266	dead	male		no	ii	no	yes	no	m0	n0	stage ia	t1a	with tumor	no		yes
TCGA-EE-A2GK-01A	1665	alive	female		no	iii		no	no	m0	n0	stage i	t1	tumor free	no		yes
TCGA-EE-A2GL-01A	2423	alive	female		no	iv	no		no	m0	n0	stage iia	t3a	with tumor	yes		yes
TCGA-EE-A2GM-01A	2296	alive	female		no	iv	yes	yes	no	m0	n0	stage iic	t4b	tumor free	no		yes
TCGA-EE-A2GN-01A	3106	dead	male		yes	iv	yes	no	no	m0	n0	stage iia	t2b	with tumor	no		yes
TCGA-EE-A2GP-01A	423	dead	male		no	iv	yes		no	m0	n1a	stage iiib	t4b	with tumor	no		yes
TCGA-EE-A2GR-01A	1301	dead	male		no	iv			no	m0	n0	stage ii	t4	with tumor	no	2	yes
TCGA-EE-A2GS-01A	2470	dead	female		no	iv	no	no	no	m0	n0	stage ib	t2a	with tumor	yes		yes
TCGA-EE-A2GT-01A	1365	alive	male		no	iv	no	yes	no	m0	n0	stage iia	t3a	with tumor	no		yes
TCGA-EE-A2GU-01A	2884	alive	female		no	ii	no		no	m0	n0	stage ia	t1a	tumor free	yes		yes
TCGA-EE-A2M5-01A	659	dead	male		no	iii	no	no	no	m0	n0	stage i	t2	with tumor	no		yes
TCGA-EE-A2M6-01A	3932	alive	male		no	ii	no		no	m0	n0	stage i	t1	tumor free	yes		yes
TCGA-EE-A2M7-01A	877	dead	male		no	iii		no	no	m0	n0	stage ii	t3a	with tumor	no		yes
TCGA-EE-A2M8-01A	601	dead	female		no	iv	no	no	no	m0	n1	stage iii	t3a	with tumor	no		yes
TCGA-EE-A2MC-01A	1871	dead	male		no	iii	no	no	no	m0	n0	stage i	t2	tumor free	no		yes
TCGA-EE-A2MD-01A	1438	dead	male		no	iii	yes	no	no	m0	n0	stage ii	t3a	with tumor	no		yes
TCGA-EE-A2ME-01A	3141	dead	male		no	iii	no	no	no	m0	n0	stage i	t2	with tumor	yes		yes
TCGA-EE-A2MF-01A	8174	dead	female		no	iv		yes	no	m0	n0	stage i	t2	with tumor	no	1	yes
TCGA-EE-A2MG-01A	3139	dead	male		no	iii		no	no	m0	n0	stage i	t2	with tumor	yes	1	yes
TCGA-EE-A2MH-01A	516	dead	male		no	v	no	no	no	m0	n0	stage iii	t4a	with tumor	yes		yes
TCGA-EE-A2MI-01A	6225	dead	male		no	ii		yes	no	m0	n0	stage iib	t4	with tumor	no		yes
TCGA-EE-A2MJ-01A	2927	dead	male		no	v	no	yes	no	m0	n0	stage iii	t4b	tumor free	no		yes
TCGA-EE-A2MK-01A	5487	alive	female		no	iv	no		no	m0	n0	stage iii	t4a	tumor free	no		yes
TCGA-EE-A2ML-01A	6590	dead	male		no	iii	no	no	no	m0	n0	stage ii	t3a	with tumor	yes		yes
TCGA-EE-A2MM-01A	5107	dead	female		no	iii		yes	no	m0	n0	stage i	t2	with tumor	yes	1	yes
TCGA-EE-A2MN-01A	1446	dead	male		no	iii	no	no	no	m0	n0	stage i	t2	with tumor	no		yes
TCGA-EE-A2MP-01A	7563	alive	female		no			yes	no	m0	n0	stage i	t2	with tumor	no		yes
TCGA-EE-A2MQ-01A	1315	dead	female		no	iv	no	no	no	m0	n2a	stage iiia	t3a	with tumor	no		yes
TCGA-EE-A2MS-01A	4942	alive	male		no	iv	no	yes	no	m0	n0	stage ii	t3a	tumor free	no		yes
TCGA-EE-A2MT-01A	2166	alive	male		no	iv	no		no	m0	n0	stage ib	t2a	tumor free	no		yes
TCGA-EE-A2MU-01A	1620	alive	male		no	ii	no		no	m0	n0	stage ia	t1a	tumor free	no		yes
TCGA-EE-A3AA-01A	3781	alive	male		no				no	m0	n2a	stage iii	t0	tumor free	yes		no
TCGA-EE-A3AB-01A	3733	alive	male		no				no	m0	n2a	stage iii	t0	tumor free	no		no
TCGA-EE-A3AC-01A	1948	alive	male		no				no	m0	n2b	stage iii	t0	tumor free	no		no
TCGA-EE-A3AD-01A	875	dead	male		no				no	m0	n1b	stage iii	t0	with tumor	no		no
TCGA-EE-A3AE-01A	1658	alive	female		no	iii	no		no	m0	n0	stage ia	t1a	tumor free	yes		yes
TCGA-EE-A3AF-01A	420	dead	female		no			no	no	m0	n3	stage iiic	t0	with tumor	no		no
TCGA-EE-A3AG-01A	1265	dead	male		no			no	no	m0	n2c	stage iii	t0	with tumor	yes		no
TCGA-EE-A3AH-01A	4222	dead	male		no	iii	no	yes	no	m0	n0	stage ii	t3b	with tumor	no		yes
TCGA-EE-A3J3-01A	5237	dead	male		no			yes	no	m0	n0	stage ib	t2	with tumor		1	yes
TCGA-EE-A3J4-01A	3869	dead	male		no	iv	yes	yes	no	m0	n0	stage ii	t3a	with tumor	no	1	yes
TCGA-EE-A3J5-01A	1124	dead	male		no	v	no	no	no	m0	n1	stage iii	t4a	with tumor	no	1	yes
TCGA-EE-A3J7-01A	1949	alive	male		no	ii	yes	yes	no	m0	n0	stage i	t2	tumor free	no	1	yes
TCGA-EE-A3J8-01A	1044	dead	male		no	iv	no	no	no	m0	n1a	stage iiia	t4a	tumor free	no	1	yes
TCGA-EE-A3JA-01A	1618	dead	male		no	iv	no	yes	no	m0	n0	stage ib	t2a	with tumor	no	1	yes
TCGA-EE-A3JB-01A	6138	alive	female		yes	iv		yes	no	m0	n1	stage iii	t3a	with tumor	no	1	yes
TCGA-EE-A3JE-01A	1562	alive	male		no	iv	yes	yes	no	m0	n1a	stage iiib	t3b	tumor free	no	1	yes
TCGA-EE-A3JH-01A	4086	alive	male		no	iii		yes	no	m0	n0	stage ib	t2	tumor free	no	1	yes
TCGA-EE-A3JI-01A	4648	dead	male		no	iv	no	yes	no	m0	n0	stage i	t2	with tumor	no	3	yes
TCGA-ER-A194-01A	1354	dead	male		no	iv	yes		no	m0	n0			with tumor	no		yes
TCGA-ER-A195-01A	1078	dead	male		no				no	m0	n0		tx	with tumor	yes	1	yes
TCGA-ER-A196-01A	1785	alive	female		no	iv	yes		no	m0	n0	stage iic	t4b	tumor free	no		yes
TCGA-ER-A197-01A	424	dead	female		no		yes	no	no	m0	n1a	stage iiib	t4b	with tumor	no		yes
TCGA-ER-A199-01A	279	dead	female		no	iv	yes	no	no	m0	n3	stage iiic	t4b	with tumor		1	yes
TCGA-ER-A19A-01A	2365	alive	male		no			no	no	m1	n0	stage iv	tx	tumor free	no		no
TCGA-ER-A19B-01A	2993	dead	male		yes			yes	no	m0	n0		tx	with tumor	no		yes
TCGA-ER-A19C-01A	1487	dead	male		no	iii	no		no	m0	nx	stage i	t2a	with tumor	no	1	yes
TCGA-ER-A19D-01A	383	dead	female		no	iv	no	no	no	m0	n0	stage ib	t2a	with tumor	no		yes
TCGA-ER-A19E-01A	396	dead	female		no	iii	no	no	no	m0	n0	stage ib	t2a	with tumor	yes		yes
TCGA-ER-A19F-01A	802	dead	male		no				no	m0	n0			tumor free	no		yes
TCGA-ER-A19G-01A	9188	alive	female		no	ii	no		no	m0	n0			tumor free	no	1	yes
TCGA-ER-A19H-01A	4634	dead	male		no	ii			no	m0	n0			tumor free	yes	1	yes
TCGA-ER-A19J-01A	196	dead	male		no			no	no	m1	n3	stage iv	tx	with tumor	no		no
TCGA-ER-A19K-01A	469	dead	female		no	v	yes	no	no	m0	n0	stage iic	t4b	with tumor	yes		yes
TCGA-ER-A19L-01A	4000	dead	male		no			no	no					with tumor	no		yes
TCGA-ER-A19M-01A	1857	dead	male		no	iv	no	no	no	m0	n0	stage ib	t2a	with tumor	yes		yes
TCGA-ER-A19N-01A	1341	dead	male		no				no					tumor free	yes		no
TCGA-ER-A19O-01A	0	dead	male		no			no	no	m0	n1b	stage iiib	t3b	with tumor	yes	1	yes
TCGA-ER-A19P-01A	4930	dead	female		no	iv		no	no	m0	n0			with tumor	no	1	yes
TCGA-ER-A19Q-01A	1548	dead	female		no	iii	no	no	no	m0	n0			with tumor	yes		yes
TCGA-ER-A19S-01A	1505	alive	female		no				no					tumor free	no		no
TCGA-ER-A19T-01A	270	dead	male	167	no	v	no	no	no	m1a	n3	stage iv	t4a	with tumor	no		yes	78
TCGA-ER-A19W-01A	4507	dead	female		no	ii	no	no	no					with tumor	no		yes
TCGA-ER-A1A1-01A	3196	alive	male		no				no	m0	n3	stage iiic	tx	tumor free	yes		no
TCGA-ER-A2NB-01A	857	dead	male		no	iv	yes	no	no	m0	n2	stage iiib	t4b	with tumor	no		yes
TCGA-ER-A2NC-01A	1333	dead	male		no		no	no	no	m0	n0	stage ib	t2a	with tumor	no		yes
TCGA-ER-A2ND-01A	710	dead	female		no	iv	no		no	m0	n3	stage iiic	t1b	with tumor	no		yes
TCGA-ER-A2NE-01A	613	dead	male		yes				no	m0	n0	stage 0	tis	with tumor	no		yes
TCGA-ER-A2NF-01A	877	dead	male		no	v	yes	no	no	m0	n3	stage iiib	t3b	with tumor	yes	2	yes
TCGA-ER-A2NG-01A	1490	dead	female		no	iii	yes	no	no	m0	n3	stage iiic	t3b	with tumor	yes		yes
TCGA-ER-A2NH-01A	1264	alive	male		no	iv	no		no	m0	n3	stage iiic	t3a	with tumor	no		yes
TCGA-ER-A3ES-01A	7514	dead	male		yes				no					with tumor	no		yes
TCGA-ER-A3ET-01A	2829	dead	female		no	iv		no	no	m0	n1a	stage iiia	t3a	with tumor	no		yes
TCGA-ER-A3EV-01A	1429	dead	male	182	no			no	no	m0	n0	stage iii	t4	with tumor	no		yes	90
TCGA-ER-A3PL-01A	1010	alive	male		no	v	yes	no	no	m1a	n0	stage iv	t3b	with tumor	no		yes
TCGA-ER-A42H-01A	426	dead	male		no			no	no					with tumor	no		yes
TCGA-ER-A42K-01A	394	dead	female		no	iv	yes	no	no	m0	n3	stage iiic	t4b	with tumor	no		yes
TCGA-ER-A42L-01A	4533	alive	male		no	iv	no	no	no	m0	n0	stage ii	t3	tumor free	no		yes
TCGA-FR-A2OS-01A	368	dead	female	164	no	v	yes	no	no	m0	n0	stage iic	t4b	with tumor	no	1	yes	84
TCGA-FR-A3R1-01A	685	alive	male	178	no	v	yes		no	m0	n0	stage iic	t4b	with tumor	no		yes	84
TCGA-FR-A3YN-01A	2828	alive	male	179	no	iv	no		no	m0	n0	stage ib	t2a	tumor free	yes		yes	89
TCGA-FR-A44A-01A	5299	alive	female		no	iv	no	no	no	m0	n0	stage ii	t3a	tumor free	yes	1	yes	105
TCGA-FR-A69P-01A	478	alive	female	173	no				no		n3	stage iiic	tx	tumor free	yes		no	76
TCGA-FR-A726-01A	305	dead	male	179	no	iv	yes		no	m0	n0	stage iic	t4b	with tumor	no		yes	81
TCGA-FR-A728-01A	583	alive	female	165	no	iv	yes	no	no	m0	n2a	stage iiib	t4b	tumor free	yes		yes	87
TCGA-FR-A7U8-01A	847	alive	male	183	yes				no	m0	n3	stage iiic	tx	with tumor	no		no	75
TCGA-FR-A7U9-01A	571	alive	female	160	no	iv	yes	no	no	m0	n3	stage iiic	t3b	tumor free	yes		yes	67
TCGA-FR-A7UA-01A	1164	alive	female	162	no	iv	no		no	m0	n0	stage ib	t2a	tumor free	no		yes	87
TCGA-FR-A8YC-01A	1059	dead	male	168	no	iv	yes		no	m0	n0	stage iib	t3b	with tumor	yes		yes	74
TCGA-FR-A8YD-01A	1103	dead	female	158	no	iv	yes		no	m0	n0	stage iic	t4b	with tumor	yes		yes	77
TCGA-FR-A8YE-01A	3176	alive	male	175	no	iii	no		no	m0	n0	stage ia	t1a	tumor free	no		yes	79
TCGA-FS-A1YW-01A	6598	dead	male		no	iv	no		no	m0	n0	stage ib	t1b	with tumor	yes	1	yes
TCGA-FS-A1YX-01A	1478	dead	female		no	iv	no		no	m0	n0	stage i	t2	with tumor	no	1	yes
TCGA-FS-A1YY-01A	6953	dead	female		no	iv	no		no	m0	n0	stage iia	t3a	with tumor	no	1	yes
TCGA-FS-A1Z0-01A	6164	dead	female		no	iii	no		no	m0	n0	stage ia	t1a	with tumor	no	1	yes
TCGA-FS-A1Z3-01A	636	dead	female		no				no	m1	n0	stage iv	tx	with tumor	no	0	no
TCGA-FS-A1Z4-01A	854	dead	male		no	iii	no		no	m0	n0	stage i	t1	with tumor	no	1	yes
TCGA-FS-A1Z7-01A	237	dead	male		no	v	yes		no	m0	n1b	stage iiic	t4b	with tumor	no	1	yes
TCGA-FS-A1ZA-01A	843	dead	female		no	iv	yes		no	m0	n2c	stage iiib	t4b	with tumor	no	1	yes
TCGA-FS-A1ZB-01A	1486	dead	male		no	ii	no		no	m0	n0	stage ii	t3a	with tumor	no	1	yes
TCGA-FS-A1ZC-01A	10870	dead	male		no	iii			no	m0	n0	i/ii nos	tx	with tumor	no	1	yes
TCGA-FS-A1ZD-01A	1628	dead	male		no	iii	yes		no	m0	n0	stage iia	t2b	with tumor	yes	1	yes
TCGA-FS-A1ZE-01A	1413	dead	male		no	iii	yes		no	m0	n0	stage iic	t4b	with tumor	no	1	yes
TCGA-FS-A1ZG-01A	295	dead	female		no	v	yes		no	m0	n2b	stage iiic	t4b	with tumor	no	1	yes
TCGA-FS-A1ZH-01A	996	dead	female		no	iv	yes		no	m1c	n2c	stage iv	t3b	with tumor	no	1	yes
TCGA-FS-A1ZJ-01A	1441	dead	female		no	iv	no		no	m0	n0	stage i	t2	with tumor	no	1	yes
TCGA-FS-A1ZK-01A	728	dead	male		no	iv			no	m0	n0	stage ii	t4	with tumor	no	1	yes
TCGA-FS-A1ZM-01A	3080	alive	male		no	iv			no	m0	n2c	stage iii	t2	tumor free	no	1	yes
TCGA-FS-A1ZN-01A	730	dead	male		no	iv	yes		no	m0	n1a	stage iiia	t4b	with tumor	yes	1	yes
TCGA-FS-A1ZP-01A	2273	dead	male		no	iii			no	m0	n0	stage ii	t3	with tumor	no	1	yes
TCGA-FS-A1ZQ-01A	4062	dead	male		no				no	m0	n0	i/ii nos	tx	with tumor	yes	1	yes
TCGA-FS-A1ZR-01A	347	dead	male		no	iv			no	m0	n0	stage ii	t2	with tumor	no	1	yes
TCGA-FS-A1ZS-01A	4526	alive	male		no				no	m0	n0	stage i	t2	with tumor	no	1	yes
TCGA-FS-A1ZT-01A	1617	alive	male		no	iv			no	m0	n1b	stage iii	t2	tumor free	yes	1	yes
TCGA-FS-A1ZU-01A	808	dead	female		no	v	yes		no	m0	n0	stage iic	t4b	with tumor	no	1	yes
TCGA-FS-A1ZW-01A	1505	alive	male		no	iii	yes		no	m0	n1a	stage iiib	t2b	tumor free	yes	1	yes
TCGA-FS-A1ZY-01A	824	dead	male		yes	iv	yes		no	m0	n0	stage iib	t3b	with tumor	no	1	yes
TCGA-FS-A1ZZ-01A	822	dead	female		yes	iv	yes		no	m0	n0	stage iib	t3b	with tumor	no	1	yes
TCGA-FS-A4F0-01A	2367	alive	female		yes	v	no		no	m0	n0	stage iib	t4a	tumor free	yes	1	yes
TCGA-FS-A4F2-01A	1525	dead	female		no	v	yes		no	m0	n0	stage iic	t4b	with tumor	no	1	yes
TCGA-FS-A4F4-01A	2028	dead	male		no	iv	yes		no	m0	n0	stage ii	t3a	with tumor	no	1	yes
TCGA-FS-A4F5-01A	874	dead	female		no	iv	no		no	m0	n0	stage ib	t2a	with tumor	no	1	yes
TCGA-FS-A4F8-01A	5318	dead	male		no				no	m0	n0	stage i	t1	with tumor	no	1	yes
TCGA-FS-A4F9-01A	1035	alive	male		no		yes	no	no	m0	n3	stage iiic	t4b	with tumor	no	1	yes
TCGA-FS-A4FB-01A	813	dead	female		no	iv			no	m0	n1a	stage iii	t2	with tumor	no	1	yes
TCGA-FS-A4FC-01A	1655	dead	female		no	iv	no		no	m0	n0	stage iia	t3a	with tumor	no	1	yes
TCGA-FS-A4FD-01A	2454	dead	male		yes	iv			no	m0	n3	stage iiic	t2	with tumor	no	1	yes
TCGA-FW-A3I3-01A	531	alive	female	173	no				no	m1	n0	stage iv		tumor free	no		no	105
TCGA-FW-A3TU-01A	1691	dead	female		no	iv			no					with tumor	no	1	yes
TCGA-FW-A3TV-01A	411	alive	female	165	no	iii			no	m0	n2b	stage iiib	t1	with tumor	yes		yes	86
TCGA-FW-A5DX-01A	640	alive	male		no		no		no		n3	stage iiic	t4a	tumor free	no	1	yes
TCGA-FW-A5DY-01A	587	alive	female		no				no		n1	stage iii	t3	tumor free	no		yes
TCGA-GF-A2C7-01A	21	alive	male		no	iv	yes		no	m0	n0	stage iic	t4b	tumor free	no		yes
TCGA-GF-A3OT-01A	301	alive	female		no			no	no	m0	n3	stage iiic	t3	with tumor	yes		yes	66
TCGA-GF-A4EO-01A	591	alive	female	166	no				no	m0	n3	stage iiic	t0	tumor free	no		no	105
TCGA-GF-A6C8-01A	62	alive	female	167	no	iv	yes		no	m0	nx	stage iib	t3b			1	yes	67
TCGA-GF-A6C9-01A	480	alive	male	172	no				no			stage iiib		tumor free	no		no	87
TCGA-GF-A769-01A	1070	dead	male	182	no	iv	yes		no	m0	nx	stage iic	t4b	with tumor	no	1	yes	88
TCGA-GN-A262-01A	4255	alive	female	159	yes			no	no					with tumor	no	1	yes	72
TCGA-GN-A263-01A	467	dead	male	170	no	v	yes	no	no	m1c	n3	stage iv	t4b	with tumor	no	1	yes	92
TCGA-GN-A264-01A	3587	dead	male		no	v	no	no	no					with tumor	yes	1	yes	104
TCGA-GN-A265-01A	2948	alive	male		no			no	no					tumor free	no		no	85
TCGA-GN-A266-01A	308	dead	male	173	no			no	no					with tumor	no		no	103
TCGA-GN-A267-01A	1960	dead	male	167	no	iv	no	yes	no	m0	n1a	stage iiia	t4a	with tumor	yes	1	yes	96
TCGA-GN-A268-01A	1910	dead	female	155	no	v	no	yes	no	m0	n0	stage iib	t4a	with tumor	no	1	yes	55
TCGA-GN-A269-01A	170	dead	male	170	no	v	yes		no	m0	n3	stage iiic	t4b	with tumor	no	1	yes	77
TCGA-GN-A26A-01A	988	dead	female	165	no	iv	no	no	no	m0	n1a	stage iiia	t3a	with tumor	no	1	yes	66
TCGA-GN-A26C-01A	821	dead	male		no	iv	yes	no	no	m0	n2b	stage iiic	t4b	with tumor	no	1	yes	101
TCGA-GN-A26D-01A	1460	dead	female	156	no	v	yes	yes	no		n0	stage iic	t4b	with tumor	yes	1	yes	68
TCGA-GN-A4U3-01A	3708	alive	male	180	no	iv	no	no	no	m0	n1a	stage iii	t3a	tumor free	no	1	yes	84
TCGA-GN-A4U4-01A	1197	alive	male	175	no	iv	yes	no	no	m0	nx	stage iia	t2b	tumor free	no	1	yes	85
TCGA-GN-A4U5-01A	1156	alive	female	157	no	iv	no		no	m0	nx	stage ib	t2a	tumor free	yes	1	yes	84
TCGA-GN-A4U7-01A	317	dead	female	161	no	iv	no	no	no	m0	n3	stage iiic	t2b	with tumor	no	1	yes	48
TCGA-GN-A4U8-01A	1487	alive	male	180	no				no					tumor free	yes		yes
TCGA-GN-A4U9-01A	673	dead	male	176	no	iv	yes	no	no	m0	n3	stage iiic	t2b	with tumor	yes	1	yes	104
TCGA-GN-A8LK-01A	1524	dead	male	175	no	iv	no	yes	no		nx	stage ib	t1b	with tumor	no	1	yes	93
TCGA-GN-A8LL-01A	650	dead	female	154	no		yes		no	m0	nx	stage iic	t4b	with tumor	no		yes	89
TCGA-GN-A8LN-01A	772	alive	male	180	no	iv	yes	no	no	m0	nx	stage iic	t4b	with tumor	no	1	yes	108
TCGA-GN-A9SD-01A	1807	dead	female	158	yes	iii	no	yes	no	m0	nx	stage ia	t1a	with tumor	yes	1	yes	97
TCGA-HR-A2OG-01A	7	alive	female		no				no					tumor free	no		yes
TCGA-HR-A2OH-01A	2004	dead	female	169	no		yes		no	m0	n2a	stage iiib	t3b	with tumor	yes	1	yes
TCGA-HR-A5NC-01A	1000	alive	female	152	no	v		no	no	m0	nx		t4	tumor free	no	1	yes
TCGA-IH-A3EA-01A	524	alive	male	175	no		yes	no	no	m0	n0	stage iic	t4b	with tumor	no		yes	81
TCGA-LH-A9QB-01A	11217	alive	female	160	no	iii		no	no					tumor free	no	1	yes	86
TCGA-OD-A75X-01A	9061	dead	male	182	no				no	m0	nx		tx	with tumor	no		yes	103
TCGA-QB-A6FS-01A	220	alive	male	184	no			no	no	m0	n3	stage iiic	t0	with tumor	no		no	78
TCGA-RP-A690-01A	6	alive	female	162	no				no					tumor free			no	49
TCGA-RP-A693-01A	10	alive	male	178	no				no	m1c	nx	stage iv	tx	tumor free	no		no	81
TCGA-RP-A694-01A	21	alive	male	185	no				no	m1c	nx	stage iv	tx	tumor free	no		no	99
TCGA-RP-A695-01A	0	alive	male	182	no				no	m1c	nx	stage iv	tx	tumor free	no		yes	95
TCGA-RP-A6K9-01A	0	alive	female	162	no			yes	no								yes	48
TCGA-W3-A824-01A	6940	alive	male	170	no			no	no	m0	n0	stage i	t2	with tumor	yes		yes	79
TCGA-W3-A825-01A	1917	dead	female	162	no	iv			no	m0	n0	stage ii	t3	with tumor	yes		yes	77
TCGA-W3-A828-01A	3683	dead	male	180	no	iv		no	no	m0	n0	stage ii	t3		yes		yes	91
TCGA-W3-AA1O-01A	122	dead	male	183	no				no	m0	n2	stage iii	tx	with tumor	yes		no	89
TCGA-W3-AA1Q-01A	2101	dead	male	178	no				no	m0	n1	stage iii	tx	with tumor	yes		no	73
TCGA-W3-AA1R-01A	3379	dead	male	180	no	v		no	no	m0	n0	stage ii	t3	with tumor	yes		yes	86
TCGA-W3-AA1V-01A	1280	dead	male	180	no	iv	no	no	no	m0	n0	stage ii	t3	with tumor	yes		yes	91
TCGA-W3-AA1W-01A	6666	alive	male	170	yes	iv	no	yes	no	m0	n0	stage ii	t3	tumor free	yes		yes	101
TCGA-W3-AA21-01A	3195	dead	male	175	no	iii	no	no	no	m0	n0	stage i	t2	with tumor	yes		yes	99
TCGA-WE-A8JZ-01A	731	alive	male		no		yes		no	m0	n1a	stage iiib	t4b	tumor free	yes	2	yes
TCGA-WE-A8K1-01A	1492	alive	male		no		yes		no	m0	n3	stage iiic	t3b	tumor free	no	1	yes
TCGA-WE-A8K6-01A	546	alive	male		no			no	no	m0	n1b	stage iiib	tx	with tumor	no	1	yes
TCGA-WE-A8ZM-01A	3082	alive	male		no			yes	no	m0	n1b	stage iiib	tx	with tumor	no	1	yes
TCGA-WE-A8ZN-01A	1794	alive	male		no		no		no	m0	nx	stage iib	t4a	with tumor	yes	1	yes
TCGA-WE-A8ZO-01A	2145	alive	female		no	iv	no	yes	no	m0	n1b	stage iiib	t3a	tumor free	no	1	yes
TCGA-WE-A8ZQ-01A	1923	alive	male		no		no		no	m0	n0	stage iia	t3a	with tumor	no	1	yes
TCGA-WE-A8ZR-01A	274	dead	male		no		yes		no	m0	n1b	stage iiic	t4b	with tumor	no	1	yes
TCGA-WE-A8ZT-01A	359	alive	female		no		yes	no	no	m1b	n1b	stage iv	t3b	tumor free	no	1	yes
TCGA-WE-A8ZX-01A	1089	alive	male		no			no	no	m0	n1b	stage iiib	tx	tumor free	no		no
TCGA-WE-A8ZY-01A	1506	dead	male		no		no		no	m0	nx	stage iia	t3a	with tumor	no	1	yes
TCGA-WE-AA9Y-01A	370	alive	male		no		no		no	m0	n3	stage iiic	t2a	tumor free	no	1	yes
TCGA-WE-AAA0-01A	1229	alive	male		no		no		no	m0	n0	stage ia	t1a	tumor free	no	1	yes
TCGA-WE-AAA4-01A	760	alive	female		no				no	m0	n3	stage iiic	tx	with tumor	yes	1	yes
TCGA-XV-A9VZ-01A	11	alive	female	158	no	iv			no	m0	n0	stage ii	t4	tumor free	no		yes	52
TCGA-XV-A9W2-01A	417	alive	male	157	no	ii			no	m0	n0	stage i	t1	tumor free	no		yes	56
TCGA-XV-A9W5-01A	392	alive	male	180	no	iv			no	m0	n0	i/ii nos	t2	with tumor	yes		yes	105
TCGA-XV-AAZV-01A	412	alive	female	172	no	iv			no	m0	n0	stage ii	t4	tumor free	no		yes	83
TCGA-XV-AAZW-01A	393	dead	female	170	no	v			no	m0	n0	stage ii	t4	with tumor	no		yes	74
TCGA-XV-AAZY-01A	405	alive	female	167	no	v			no	m0	n3	stage iiic	t4	tumor free	no		yes	67
TCGA-XV-AB01-01A	403	alive	female	164	no				no	m0	nx	stage ii	t3	with tumor	yes		yes	78
TCGA-YD-A89C-01A	210	alive	female	164	no	iv	no		no	m0	nx	stage ia	t1a	tumor free	no		yes	59
TCGA-YD-A9TA-01A	1496	alive	male	175	no	iii			no					tumor free	no	1	yes	67
TCGA-YD-A9TB-01A	0	alive	female	162	no	iv	no	no	no					with tumor	no	1	yes	56
TCGA-YG-AA3N-01A	306	alive	male	152	no	iv			no	m0	n0	stage iic	t4b	tumor free	no	1	yes	80
TCGA-YG-AA3O-01A	1154	dead	male	173	no				no					with tumor	yes		yes	92
TCGA-YG-AA3P-01A	439	alive	female	160	no	v	no		no	m0	n0	stage iib	t4a	with tumor	yes		yes	64
TCGA-Z2-A8RT-01A	839	alive	female	155	no	iii	yes		no	m0	n0	stage iib	t3b	tumor free	yes		yes	77
TCGA-Z2-AA3S-01A	2950	alive	male	172	no	ii	no	no	no	m0	n0	stage ia	t1a	with tumor	no		yes	78
TCGA-Z2-AA3V-01A	486	alive	female	166	no		no		no	m0	n0	stage ia	t1a	tumor free	yes		yes	63
