# Supplementary material for: Construction and validation of a prognostic risk model of angiogenesis factors in skin cutaneous melanoma
Source: Aging (Albany NY). 2022 Feb 14;14(3):1529–48. doi: 10.18632/aging.203895 (PMC8876895; doi:10.18632/aging.203895)
Supplement: Supplementary Table 2 [file aging-14-203895-s003.xlsx]

## Sheet: Sheet1
Supplementary Table 2. The clinical characteristics of melanoma patients from GSE65904 dataset.
Accession	Gender	Age	Tumor stage	Distant metastasis free survival in days	Distant metastasis free survival (1=death, 0=alive)	Disease specific survival (1=death, 0=alive)	Disease specific survival in days
GSM1608593	Male	55	Regional	1714	0	0	1714
GSM1608602	Female	77	Regional	1401	1	1	1401
GSM1608692	Female	71	Regional	424	0	0	424
GSM1608693	Male	83	Regional	574	1	1	574
GSM1608694	Female	68	Regional	161	1	0	1027
GSM1608695	Male	66	Regional	5632	0	0	5632
GSM1608696	Female	79	Regional	1429	0	0	1429
GSM1608697	Female	62	Regional	145	1	1	303
GSM1608698	Male	65	Regional	333	0	0	333
GSM1608699	Male	73	General	NA	NA	1	82
GSM1608700	Male	84	NA	379	1	1	493
GSM1608701	Male	77	Local	170	0	0	170
GSM1608603	Female	88	Primary	101	0	0	101
GSM1608702	Male	58	Regional	295	1	0	358
GSM1608703	Female	67	Regional	2239	0	0	2239
GSM1608704	Female	52	Regional	NA	NA	1	126
GSM1608705	Female	64	Regional	2319	0	0	2319
GSM1608706	Male	61	Primary	40	1	1	707
GSM1608707	Male	63	Regional	229	1	1	1325
GSM1608708	Male	62	Regional	69	1	1	137
GSM1608709	Male	71	Regional	897	1	1	1432
GSM1608710	Female	66	General	NA	NA	1	6
GSM1608711	Female	49	General	NA	NA	0	158
GSM1608604	Male	47	Regional	2368	1	1	3021
GSM1608712	Female	81	Regional	NA	NA	1	386
GSM1608713	Female	47	Regional	469	1	0	652
GSM1608714	Female	25	Regional	5005	0	0	5005
GSM1608715	Female	74	Regional	186	0	0	186
GSM1608716	Male	86	In-transit	73	1	0	89
GSM1608717	Female	67	Regional	405	1	1	442
GSM1608718	Male	59	Regional	160	1	1	650
GSM1608719	Male	60	Regional	307	0	0	307
GSM1608720	Male	81	Regional	4450	1	0	4450
GSM1608721	Female	59	Regional	NA	NA	1	188
GSM1608605	Male	65	In-transit	502	1	1	643
GSM1608722	Male	65	In-transit	727	1	1	1222
GSM1608723	Male	77	Regional	288	1	0	1231
GSM1608724	Male	67	Regional	20	1	1	623
GSM1608725	Female	84	General	NA	NA	1	197
GSM1608726	Male	63	Regional	NA	NA	0	318
GSM1608727	Male	33	Regional	235	1	1	380
GSM1608728	Male	32	Regional	1912	0	0	1912
GSM1608729	Male	82	Primary	354	1	0	420
GSM1608730	Female	44	Local	NA	NA	1	526
GSM1608731	Female	71	Regional	NA	NA	0	212
GSM1608606	Male	44	Regional	792	1	1	1344
GSM1608732	Female	65	Regional	461	1	0	880
GSM1608733	Male	31	General	NA	NA	1	375
GSM1608734	Male	60	Regional	116	1	1	262
GSM1608735	Male	70	Regional	56	1	1	56
GSM1608736	Female	45	In-transit	NA	NA	1	356
GSM1608737	Male	60	Regional	476	1	1	476
GSM1608738	Female	NA	Primary	NA	NA	NA	NA
GSM1608739	Male	89	Regional	NA	NA	1	638
GSM1608740	Female	63	In-transit	NA	NA	1	435
GSM1608741	Male	64	Primary	43	0	0	43
GSM1608607	Male	33	Regional	1101	0	0	1101
GSM1608742	Male	73	Regional	NA	NA	1	42
GSM1608743	Male	71	In-transit	NA	NA	1	337
GSM1608744	Male	68	Regional	NA	NA	1	392
GSM1608745	Male	63	General	NA	NA	1	593
GSM1608746	Female	48	Regional	110	1	1	957
GSM1608747	Female	77	Regional	678	0	0	678
GSM1608748	Female	87	Primary	324	0	0	324
GSM1608749	Female	55	General	NA	NA	1	634
GSM1608750	Female	29	Regional	647	0	0	647
GSM1608751	Female	67	Regional	235	1	1	732
GSM1608608	Female	65	In-transit	75	0	0	75
GSM1608752	Female	91	Local	252	0	0	252
GSM1608753	Male	58	Regional	357	1	1	411
GSM1608754	Male	72	Regional	155	1	1	336
GSM1608755	Male	62	Regional	114	1	1	132
GSM1608756	Female	70	Regional	861	0	0	861
GSM1608757	Female	62	Regional	1779	0	0	1779
GSM1608758	Male	70	Local	1897	1	1	1958
GSM1608759	Male	70	Regional	NA	NA	1	93
GSM1608760	Female	69	NA	18	1	1	72
GSM1608761	Female	47	Regional	177	1	1	461
GSM1608609	Male	88	Regional	NA	NA	1	77
GSM1608762	Male	69	General	NA	NA	0	456
GSM1608763	Male	41	Regional	811	1	0	2175
GSM1608764	Male	55	Regional	2800	0	0	2800
GSM1608765	Male	52	Regional	NA	NA	1	66
GSM1608766	Female	67	General	NA	NA	0	307
GSM1608767	Female	68	Regional	NA	NA	1	44
GSM1608768	Female	74	Regional	1035	0	0	1035
GSM1608769	Female	58	Regional	194	0	0	194
GSM1608770	Female	57	Regional	3363	0	0	3363
GSM1608771	Male	72	Regional	15	1	1	163
GSM1608610	Male	50	Regional	1099	1	1	1485
GSM1608772	Male	61	Regional	222	1	0	523
GSM1608773	Male	53	Local	511	0	0	511
GSM1608774	Male	73	Regional	NA	NA	1	411
GSM1608775	Male	55	Regional	NA	NA	1	85
GSM1608776	NA	NA	NA	NA	NA	NA	NA
GSM1608777	Female	66	Regional	394	1	1	682
GSM1608778	Male	64	Regional	344	1	1	629
GSM1608779	Male	65	Regional	NA	NA	1	165
GSM1608780	Female	52	General	NA	NA	1	189
GSM1608781	Male	40	Regional	NA	NA	0	66
GSM1608611	Male	85	Regional	65	1	0	93
GSM1608782	Female	30	Regional	1479	0	0	1479
GSM1608783	Female	34	General	NA	NA	1	64
GSM1608784	Female	54	Regional	174	0	0	174
GSM1608785	Male	66	Regional	498	1	1	1182
GSM1608786	Female	79	Regional	1208	1	1	1253
GSM1608787	Female	82	Primary	685	0	0	685
GSM1608788	Female	48	General	NA	NA	1	491
GSM1608789	Male	51	Regional	594	1	1	736
GSM1608790	Male	77	Regional	532	1	1	1097
GSM1608791	Male	72	Regional	NA	NA	0	789
GSM1608594	Female	39	Regional	NA	NA	1	353
GSM1608612	Male	72	Regional	370	1	1	849
GSM1608792	Male	75	Regional	336	1	0	519
GSM1608793	Male	71	Regional	1784	0	0	1784
GSM1608794	Female	64	Regional	147	1	0	566
GSM1608795	Female	73	Regional	1379	0	0	1379
GSM1608796	Male	85	General	NA	NA	0	851
GSM1608797	Female	NA	NA	NA	NA	NA	NA
GSM1608798	Male	36	In-transit	207	1	0	308
GSM1608799	Female	66	Regional	2890	0	0	2890
GSM1608800	Male	37	Regional	NA	NA	1	638
GSM1608801	Male	67	In-transit	135	1	1	295
GSM1608613	Female	79	Local	171	0	0	171
GSM1608802	Female	38	Regional	NA	NA	1	154
GSM1608803	Female	40	Regional	66	1	1	194
GSM1608804	Female	42	Regional	NA	NA	1	145
GSM1608805	Female	72	Regional	140	1	0	1194
GSM1608806	Male	53	Regional	1491	0	0	1491
GSM1608614	Female	55	Regional	NA	NA	1	195
GSM1608615	Female	61	In-transit	1266	0	0	1266
GSM1608616	Male	68	Regional	6343	0	0	6343
GSM1608617	Male	56	Regional	820	0	0	820
GSM1608618	Female	46	NA	NA	NA	NA	NA
GSM1608619	Male	65	Regional	NA	NA	0	189
GSM1608620	Male	65	Regional	372	1	1	453
GSM1608621	Male	50	In-transit	1220	0	0	1220
GSM1608595	Female	67	Primary	2127	0	0	2127
GSM1608622	Female	82	Regional	559	0	0	559
GSM1608623	Male	74	Regional	374	1	1	834
GSM1608624	Male	61	Regional	NA	NA	0	1030
GSM1608625	Male	51	Regional	3206	0	0	3206
GSM1608626	Male	61	Regional	875	1	1	1199
GSM1608627	Female	34	Local	293	1	0	5212
GSM1608628	Male	51	Local	387	1	1	592
GSM1608629	Male	71	Regional	NA	NA	0	50
GSM1608630	Male	73	Regional	655	1	0	1187
GSM1608631	Female	76	In-transit	NA	NA	1	419
GSM1608596	Male	56	NA	1442	0	0	1442
GSM1608632	Male	88	General	NA	NA	1	208
GSM1608633	Female	64	General	NA	NA	1	2481
GSM1608634	Male	78	Regional	267	0	0	267
GSM1608635	Male	74	NA	162	1	1	435
GSM1608636	Male	56	Regional	NA	NA	1	742
GSM1608637	Male	70	In-transit	97	1	1	97
GSM1608638	Male	54	NA	451	0	0	451
GSM1608639	Female	NA	NA	3779	0	0	3779
GSM1608640	Male	62	General	NA	NA	1	194
GSM1608641	Male	55	Regional	229	1	0	2574
GSM1608597	Male	46	General	NA	NA	1	66
GSM1608642	Male	60	Regional	1260	0	0	1260
GSM1608643	Female	58	Regional	561	1	0	634
GSM1608644	Male	78	Primary	22	0	0	22
GSM1608645	Male	74	Regional	421	1	1	591
GSM1608646	Female	86	Regional	105	0	0	105
GSM1608647	Male	65	Regional	NA	NA	0	1455
GSM1608648	Male	43	Regional	727	1	1	1404
GSM1608649	Female	35	General	NA	NA	1	378
GSM1608650	Male	39	Regional	2312	1	1	2530
GSM1608651	Male	52	In-transit	6	1	1	550
GSM1608598	Female	36	Regional	2631	0	0	2631
GSM1608652	Male	59	Regional	3185	0	0	3185
GSM1608653	Male	77	Regional	153	1	1	310
GSM1608654	Female	71	Primary	207	1	0	282
GSM1608655	Female	54	Regional	3315	0	0	3315
GSM1608656	Male	61	Regional	NA	NA	1	275
GSM1608657	Male	70	Regional	3582	0	0	3582
GSM1608658	Male	73	Regional	79	1	0	484
GSM1608659	Female	77	Primary	731	0	0	731
GSM1608660	Female	81	Regional	875	0	0	875
GSM1608661	Male	58	General	NA	NA	1	12
GSM1608599	Male	73	Regional	292	1	0	2427
GSM1608662	Male	53	Regional	280	1	1	642
GSM1608663	Female	74	Regional	331	1	0	461
GSM1608664	Female	71	Regional	1406	0	0	1406
GSM1608665	Male	39	Regional	1143	1	1	1329
GSM1608666	Female	46	Regional	1172	0	0	1172
GSM1608667	Female	43	Local	164	0	0	164
GSM1608668	Male	48	Regional	312	1	1	365
GSM1608669	Male	52	NA	282	1	0	2584
GSM1608670	Male	63	General	NA	NA	0	2619
GSM1608671	Male	71	Regional	21	1	1	399
GSM1608600	Male	59	Primary	1310	0	0	1310
GSM1608672	Female	55	Regional	5530	0	0	5530
GSM1608673	Male	75	Primary	6097	0	0	6097
GSM1608674	Male	56	Local	1312	0	0	1312
GSM1608675	Female	59	Regional	58	1	1	120
GSM1608676	Female	65	Regional	249	1	0	340
GSM1608677	Female	34	Regional	338	1	1	429
GSM1608678	Female	80	Primary	6453	0	0	6453
GSM1608679	Male	59	Primary	1313	0	0	1313
GSM1608680	Male	65	Regional	NA	NA	1	279
GSM1608681	Female	75	Regional	1112	0	0	1112
GSM1608601	Male	50	Regional	817	0	0	817
GSM1608682	Female	56	General	NA	NA	0	111
GSM1608683	Female	63	Regional	NA	NA	1	195
GSM1608684	Male	81	Regional	734	0	0	734
GSM1608685	Male	57	Regional	NA	NA	1	542
GSM1608686	Male	22	General	NA	NA	1	82
GSM1608687	Male	76	Local	185	1	1	303
GSM1608688	Female	76	Regional	NA	NA	1	91
GSM1608689	Male	78	Primary	13	1	0	51
GSM1608690	Male	77	In-transit	338	1	1	455
GSM1608691	Male	71	General	NA	NA	0	71
