# Supplementary material for: Construction and validation of a prognostic risk model of angiogenesis factors in skin cutaneous melanoma
Source: Aging (Albany NY). 2022 Feb 14;14(3):1529–48. doi: 10.18632/aging.203895 (PMC8876895; doi:10.18632/aging.203895)
Supplement: Supplementary Table 3 [file aging-14-203895-s004.xlsx]

## Sheet: Sheet1
Supplementary Table 3. The DEGs list of melanoma from the TCGA dataset.
Gene symbol	logFC	AveExpr	t	P.Value	adj.P.Val	B	color	mean_normal	mean_tumor
PRAME	10.6856	7.26912	77.0987	0	0	1065.01	upregulate	3.114	13.799
MLANA	10.3031	7.21243	68.2693	0	0	945.771	upregulate	3.206	13.509
PMEL	9.3284	10.5546	55.3111	0	0	753.57	upregulate	6.927	16.255
SLC45A2	9.06256	5.53085	65.5193	0	0	906.73	upregulate	2.007	11.069
BIRC7	7.81123	5.72185	53.9794	0	0	732.633	upregulate	2.684	10.495
RGS20	6.92547	5.54751	58.5322	0	0	803.306	upregulate	2.854	9.78
DLL3	6.79442	4.50247	55.6518	0	0	758.892	upregulate	1.86	8.655
FOXD3	6.73417	4.91039	58.2248	0	0	798.616	upregulate	2.292	9.026
EN2	6.69228	4.89228	65.2645	0	0	903.064	upregulate	2.29	8.982
FOXD3-AS1	6.47585	4.29122	65.6964	0	0	909.272	upregulate	1.773	8.249
SERPINE2	5.69037	12.4514	67.3869	0	0	933.344	upregulate	10.238	15.929
LZTS1	4.9632	10.1603	55.2717	0	0	752.954	upregulate	8.23	13.193
GPR19	4.49333	4.84872	57.381	0	0	785.68	upregulate	3.101	7.595
PLOD3	3.17461	12.4741	60.85	0	0	838.292	upregulate	11.24	14.414
ALX1	6.82642	4.99368	53.6144	1.22528280168629e-321	5.27019824418858e-319	726.856	upregulate	2.339	9.165
MMP17	5.3614	7.93932	53.5687	2.51973479379036e-321	1.06253757794618e-318	726.131	upregulate	5.854	11.216
CTC-231O11.1	5.55766	6.33561	52.9574	4.20549270618844e-317	1.67487641002342e-314	716.417	upregulate	4.174	9.732
TBC1D7	2.96808	10.0812	52.5205	4.50176138907189e-314	1.61358134055617e-311	709.447	upregulate	8.927	11.895
DCT	8.5302	7.88571	51.3738	4.49777e-306	1.40187e-303	691.044	upregulate	4.568	13.099
ETV4	4.56442	9.13947	51.3413	7.60059e-306	2.33512e-303	690.52	upregulate	7.364	11.929
CDK5R1	4.21085	8.33181	51.327	9.56475e-306	2.89718e-303	690.29	upregulate	6.694	10.905
RP11-374M1.2	5.09853	5.27606	50.2036	7.67947e-298	1.943e-295	672.105	upregulate	3.293	8.392
RP11-726G1.1	5.7761	6.34157	49.3498	8.59862e-292	1.88696e-289	658.188	upregulate	4.095	9.871
EME1	3.31526	6.13649	48.6486	8.49028e-287	1.75569e-284	646.697	upregulate	4.847	8.162
SLC6A15	6.63478	6.65397	48.4069	4.52732e-285	8.85132e-283	642.724	upregulate	4.074	10.709
GPRIN1	4.25774	7.66377	48.3924	5.75446e-285	1.11491e-282	642.485	upregulate	6.008	10.266
CERS1	5.2197	6.63663	48.1387	3.76776e-283	7.10786e-281	638.306	upregulate	4.607	9.826
CDK2	3.33802	11.1775	48.0349	2.08774e-282	3.8706e-280	636.596	upregulate	9.879	13.217
PLP1	6.82602	9.43293	47.192	2.39241e-276	4.08343e-274	622.655	upregulate	6.778	13.604
MFSD12	3.15975	12.0195	47.0817	1.49412e-275	2.49089e-273	620.825	upregulate	10.791	13.95
MIA	7.72062	7.48003	47.0028	5.5439e-275	8.89755e-273	619.515	upregulate	4.478	12.198
STEAP1B	5.03959	5.29893	46.7634	2.96628e-273	4.62267e-271	615.538	upregulate	3.339	8.379
AP1S2	3.06258	11.3814	46.5776	6.55066e-272	9.92102e-270	612.446	upregulate	10.19	13.253
PPT2	2.11023	10.3868	46.4661	4.19941e-271	6.18578e-269	610.589	upregulate	9.566	11.676
RP5-1039K5.19	3.95958	9.19661	46.2291	2.18919e-269	3.15977e-267	606.639	upregulate	7.657	11.616
PSRC1	2.9855	8.23131	46.1863	4.47571e-269	6.41698e-267	605.924	upregulate	7.07	10.056
POLR3G	2.81352	7.67905	46.1588	7.08809e-269	1.00951e-266	605.465	upregulate	6.585	9.398
SHC4	4.8403	7.25443	45.6321	4.75462e-265	6.51292e-263	596.661	upregulate	5.372	10.212
C16ORF59	3.20297	6.6419	45.6186	5.95392e-265	8.10412e-263	596.436	upregulate	5.396	8.599
EXO1	4.08674	6.80185	45.4144	1.82803e-263	2.44184e-261	593.014	upregulate	5.213	9.299
CLCN7	2.24649	12.4555	45.3548	4.96704e-263	6.51349e-261	592.015	upregulate	11.582	13.828
C10ORF90	6.35509	5.31441	45.3038	1.16968e-262	1.51537e-260	591.16	upregulate	2.843	9.198
SOX10	9.29356	8.72856	44.9367	5.58903e-260	7.15462e-258	584.995	upregulate	5.114	14.408
GTSE1	4.32129	7.33331	44.7787	7.98693e-259	9.98644e-257	582.338	upregulate	5.653	9.974
TUBB4A	6.60148	7.98577	44.3828	6.30702e-256	7.53548e-254	575.671	upregulate	5.419	12.02
RP11-566K11.4	4.48548	5.74499	44.3631	8.7974e-256	1.03954e-253	575.339	upregulate	4.001	8.486
SLC35B2	1.73008	11.882	44.3272	1.61372e-255	1.89643e-253	574.733	upregulate	11.209	12.939
TRPM1	7.4236	5.00804	44.2511	5.82814e-255	6.81195e-253	573.449	upregulate	2.121	9.545
SH3TC2	4.01973	7.04627	44.186	1.74864e-254	2.02184e-252	572.351	upregulate	5.483	9.503
CTD-3065J16.9	2.61233	6.18603	44.1293	4.55718e-254	5.241e-252	571.394	upregulate	5.17	7.782
EXTL1	5.91569	7.07659	44.0027	3.87849e-253	4.36706e-251	569.255	upregulate	4.776	10.692
TTLL4	2.15849	10.3006	43.8996	2.21719e-252	2.47062e-250	567.513	upregulate	9.461	11.62
SLC35B4	1.56337	10.5363	43.8297	7.23192e-252	7.89491e-250	566.331	upregulate	9.928	11.492
TRIB2	2.71895	11.9423	43.7395	3.32877e-251	3.59741e-249	564.806	upregulate	10.885	13.604
VGF	7.8327	5.74037	43.6574	1.33811e-250	1.43887e-248	563.416	upregulate	2.694	10.527
S100B	6.40653	9.94389	43.4915	2.22364e-249	2.35574e-247	560.607	upregulate	7.452	13.859
IGSF11	5.33978	7.09199	43.4565	4.02493e-249	4.24314e-247	560.014	upregulate	5.015	10.355
ETV5	3.38015	11.3823	43.0577	3.5015e-246	3.53536e-244	553.251	upregulate	10.068	13.448
FOXM1	4.13141	9.10944	42.9771	1.37751e-245	1.37152e-243	551.883	upregulate	7.503	11.634
SNCA	3.87108	9.76608	42.9097	4.33869e-245	4.28018e-243	550.736	upregulate	8.261	12.132
CTC-255N20.1	3.62001	2.88017	42.8774	7.5033e-245	7.36831e-243	550.189	upregulate	1.472	5.092
CENPF	4.12522	9.53981	42.745	7.13462e-244	6.94285e-242	547.938	upregulate	7.936	12.061
TYMS	2.96901	9.75485	42.5325	2.66055e-242	2.5206e-240	544.322	upregulate	8.6	11.569
NME1	2.07836	11.3332	42.4593	9.26222e-242	8.62309e-240	543.076	upregulate	10.525	12.603
TTYH3	2.66637	12.2289	42.4536	1.01978e-241	9.45318e-240	542.98	upregulate	11.192	13.858
AURKA	2.81529	8.53994	42.413	2.03866e-241	1.88169e-239	542.288	upregulate	7.445	10.26
FEN1	1.98851	10.0907	42.3706	4.20017e-241	3.86021e-239	541.565	upregulate	9.317	11.306
HPS4	1.92814	11.3107	42.1788	1.10506e-239	9.82046e-238	538.298	upregulate	10.561	12.489
FARP2	2.0044	11.4948	42.1348	2.34229e-239	2.07298e-237	537.547	upregulate	10.715	12.72
MOK	2.76862	9.53837	41.911	1.06869e-237	9.26747e-236	533.73	upregulate	8.462	11.23
FAM64A	4.13493	6.47221	41.8282	4.39517e-237	3.79609e-235	532.317	upregulate	4.864	8.999
SLCO4A1-AS1	5.66362	5.12688	41.8029	6.78034e-237	5.80948e-235	531.883	upregulate	2.924	8.588
KIF4A	4.07661	7.69934	41.7977	7.40684e-237	6.32109e-235	531.795	upregulate	6.114	10.191
TPX2	3.98291	9.39377	41.6992	3.98783e-236	3.36322e-234	530.113	upregulate	7.845	11.828
GDF1	4.50685	3.91287	41.6961	4.20612e-236	3.53347e-234	530.06	upregulate	2.16	6.667
TMCC2	3.29025	8.64868	41.6611	7.6587e-236	6.38403e-234	529.461	upregulate	7.369	10.659
KIF2C	3.6418	8.19492	41.6025	2.08324e-235	1.71001e-233	528.461	upregulate	6.779	10.42
MYO5A	2.69484	11.6415	41.4712	1.97175e-234	1.59415e-232	526.215	upregulate	10.594	13.288
TUBB3	4.91319	8.97486	41.4506	2.80541e-234	2.25967e-232	525.863	upregulate	7.064	11.977
HAGHL	3.51214	7.40082	41.3376	1.94257e-233	1.55304e-231	523.929	upregulate	6.035	9.547
FGD1	2.34784	9.71559	41.3066	3.3021e-233	2.63018e-231	523.399	upregulate	8.803	11.15
PRC1	3.00891	9.58273	41.3025	3.53823e-233	2.80787e-231	523.33	upregulate	8.413	11.422
GAS2L3	3.10189	8.4129	41.2691	6.27723e-233	4.96316e-231	522.757	upregulate	7.207	10.308
ZNF697	2.60098	9.69451	41.2305	1.21489e-232	9.57052e-231	522.097	upregulate	8.683	11.284
MDGA2	4.75272	3.66479	41.0978	1.18022e-231	9.09744e-230	519.825	upregulate	1.817	6.569
SRM	2.20369	11.6052	41.034	3.52465e-231	2.68798e-229	518.732	upregulate	10.748	12.952
HJURP	4.33116	7.09378	40.9852	8.13972e-231	6.1422e-229	517.896	upregulate	5.409	9.741
LEF1	3.93431	9.52407	40.9369	1.86397e-230	1.39674e-228	517.068	upregulate	7.994	11.928
P3H1	1.92585	10.6467	40.876	5.29758e-230	3.94221e-228	516.024	upregulate	9.898	11.824
VARS	1.72831	12.1841	40.8612	6.82952e-230	5.04727e-228	515.77	upregulate	11.512	13.24
TFAP2A-AS1	4.48466	4.88814	40.781	2.70527e-229	1.95891e-227	514.395	upregulate	3.144	7.629
SLC7A5	4.18489	11.9395	40.726	6.94891e-229	4.98144e-227	513.452	upregulate	10.312	14.497
SNX8	2.08831	11.0497	40.6361	3.25317e-228	2.309e-226	511.91	upregulate	10.238	12.326
TROAP	4.19056	7.06944	40.5747	9.34193e-228	6.6088e-226	510.856	upregulate	5.44	9.63
ORC6	2.98589	6.85978	40.55	1.42708e-227	9.99701e-226	510.432	upregulate	5.699	8.684
FAM78B	2.8689	7.47423	40.5395	1.70914e-227	1.1934e-225	510.252	upregulate	6.359	9.227
IL12RB2	4.4532	6.90883	40.5285	2.06586e-227	1.43781e-225	510.063	upregulate	5.177	9.63
MC1R	3.28821	8.45337	40.4851	4.35096e-227	2.99909e-225	509.318	upregulate	7.175	10.463
WDR46	1.58039	11.2179	40.4598	6.72028e-227	4.60275e-225	508.884	upregulate	10.603	12.184
FCRLA	6.20058	7.01189	40.424	1.2445e-226	8.46972e-225	508.268	upregulate	4.601	10.801
MMP14	2.67928	13.4767	40.307	9.29208e-226	6.12992e-224	506.259	upregulate	12.435	15.114
DTL	3.60852	8.11456	40.1548	1.27364e-224	8.22547e-223	503.644	upregulate	6.711	10.32
SDC3	2.80013	13.0556	40.0129	1.46345e-223	9.3115e-222	501.204	upregulate	11.967	14.767
SPC24	3.31848	7.0166	39.9864	2.31241e-223	1.45838e-221	500.747	upregulate	5.726	9.045
UBE2S	2.49774	10.1549	39.9363	5.471e-223	3.42033e-221	499.886	upregulate	9.184	11.681
CDC6	3.3915	8.13441	39.8953	1.10931e-222	6.87518e-221	499.18	upregulate	6.815	10.207
CDC45	4.12421	6.96847	39.8268	3.6055e-222	2.20911e-220	498.002	upregulate	5.365	9.489
KIF18B	4.48567	6.77269	39.7701	9.58368e-222	5.83871e-220	497.025	upregulate	5.028	9.514
CBX8	1.82931	8.49531	39.6571	6.71483e-221	4.01137e-219	495.08	upregulate	7.784	9.613
E2F1	3.28142	8.48874	39.5259	6.43943e-220	3.78378e-218	492.821	upregulate	7.213	10.494
CDCA5	3.25166	8.26973	39.5229	6.78113e-220	3.9737e-218	492.769	upregulate	7.005	10.257
KIF23	3.18911	8.44707	39.4407	2.80104e-219	1.6325e-217	491.352	upregulate	7.207	10.396
KIF14	3.91549	6.44692	39.386	7.19241e-219	4.16927e-217	490.41	upregulate	4.924	8.84
RHEBL1	2.80958	5.4461	39.3843	7.40781e-219	4.27111e-217	490.38	upregulate	4.353	7.163
FMN1	3.66434	10.8768	39.338	1.6459e-218	9.38904e-217	489.582	upregulate	9.452	13.116
KIFC1	3.74233	8.53855	39.3159	2.41164e-218	1.37208e-216	489.201	upregulate	7.083	10.826
TSPAN10	4.45933	7.95638	39.2988	3.23866e-218	1.83775e-216	488.906	upregulate	6.222	10.682
GPC2	3.69471	5.08452	39.2814	4.3734e-218	2.46862e-216	488.606	upregulate	3.648	7.342
FANCI	2.68178	9.61298	39.2524	7.20787e-218	4.05792e-216	488.107	upregulate	8.57	11.252
PLXNA1	2.76908	12.1679	39.2051	1.62935e-217	9.03115e-216	487.292	upregulate	11.091	13.86
LINC01366	3.24998	3.24515	39.1997	1.79026e-217	9.87212e-216	487.198	upregulate	1.981	5.231
UBE2T	2.76751	7.862	39.1938	1.98211e-217	1.09021e-215	487.096	upregulate	6.786	9.553
E2F7	4.00325	6.14932	39.0921	1.14663e-216	6.21144e-215	485.342	upregulate	4.592	8.596
SRGAP2	2.06017	11.2563	38.9184	2.30159e-215	1.22217e-213	482.345	upregulate	10.455	12.515
NCAPG2	1.8606	9.66263	38.888	3.89496e-215	2.06318e-213	481.819	upregulate	8.939	10.8
BCAN	6.43055	6.50515	38.8764	4.75371e-215	2.48743e-213	481.62	upregulate	4.004	10.435
BYSL	1.74479	9.86223	38.8072	1.57313e-214	8.1326e-213	480.424	upregulate	9.184	10.928
CHCHD6	2.57903	9.78583	38.7159	7.61961e-214	3.9016e-212	478.848	upregulate	8.783	11.362
IQGAP3	3.93299	8.07504	38.6002	5.63073e-213	2.86275e-211	476.849	upregulate	6.546	10.479
KIF20A	3.98294	7.78129	38.5717	9.21009e-213	4.66052e-211	476.358	upregulate	6.232	10.215
ST3GAL6-AS1	3.11162	5.06793	38.5334	1.78536e-212	8.97104e-211	475.696	upregulate	3.858	6.969
PRR7-AS1	2.77335	2.52221	38.5295	1.90992e-212	9.57452e-211	475.629	upregulate	1.444	4.217
PKMYT1	4.26479	7.68449	38.498	3.29494e-212	1.64411e-210	475.084	upregulate	6.026	10.291
RP11-549B18.1	2.47348	5.98984	38.3558	3.85597e-211	1.90636e-209	472.626	upregulate	5.028	7.501
LEF1-AS1	3.8358	4.0085	38.3372	5.31482e-211	2.62157e-209	472.305	upregulate	2.517	6.353
RAD54L	3.60748	6.62953	38.3171	7.52919e-211	3.68845e-209	471.957	upregulate	5.227	8.834
ACOT7	2.65182	11.1297	38.1429	1.53433e-209	7.33272e-208	468.945	upregulate	10.098	12.75
FOXRED2	1.82099	10.6449	38.0951	3.50807e-209	1.67283e-207	468.119	upregulate	9.937	11.758
BEST1	3.11603	8.73683	38.0397	9.15437e-209	4.346e-207	467.161	upregulate	7.525	10.641
RECQL4	2.74116	8.62616	38.0291	1.10138e-208	5.20579e-207	466.976	upregulate	7.56	10.301
BIRC5	4.20255	8.37668	38.015	1.40381e-208	6.5918e-207	466.733	upregulate	6.742	10.945
TRIM63	6.16497	6.17249	37.9915	2.10919e-208	9.83955e-207	466.327	upregulate	3.775	9.94
FBXO43	2.71316	4.12697	37.9492	4.38755e-208	2.03359e-206	465.595	upregulate	3.072	5.785
PBK	4.20722	7.0969	37.903	9.77452e-208	4.5013e-206	464.794	upregulate	5.461	9.668
AUNIP	2.21654	5.85461	37.9022	9.90784e-208	4.55295e-206	464.781	upregulate	4.993	7.209
CENPA	4.02081	5.9669	37.8149	4.49245e-207	2.05563e-205	463.27	upregulate	4.403	8.424
CLSPN	3.62769	6.57228	37.8102	4.87536e-207	2.22139e-205	463.189	upregulate	5.162	8.789
WDR62	3.03103	7.67456	37.7892	7.01856e-207	3.17103e-205	462.824	upregulate	6.496	9.527
ANLN	3.79325	8.73777	37.7242	2.16332e-206	9.63239e-205	461.7	upregulate	7.263	11.056
PARVB	2.36321	10.9932	37.6644	6.09503e-206	2.69157e-204	460.665	upregulate	10.074	12.437
GINS4	2.231	7.48284	37.6369	9.81491e-206	4.3254e-204	460.189	upregulate	6.615	8.846
KPNA2	2.0958	11.3661	37.6287	1.13237e-205	4.98012e-204	460.046	upregulate	10.551	12.647
RP13-735L24.1	3.89904	3.93778	37.5863	2.36123e-205	1.02587e-203	459.311	upregulate	2.421	6.321
TONSL	2.29311	9.03832	37.5366	5.58194e-205	2.40572e-203	458.452	upregulate	8.147	10.44
PRR11	3.01753	7.80993	37.4681	1.83247e-204	7.80376e-203	457.264	upregulate	6.636	9.654
UBE2C	4.40203	7.97548	37.454	2.3396e-204	9.92416e-203	457.02	upregulate	6.264	10.666
CDH19	5.06479	8.26332	37.4412	2.91959e-204	1.23115e-202	456.799	upregulate	6.294	11.358
CHST11	2.89802	10.6468	37.3197	2.40098e-203	9.96825e-202	454.693	upregulate	9.52	12.418
TMEM201	1.87541	10.2097	37.3078	2.94987e-203	1.22235e-201	454.487	upregulate	9.48	11.356
TRIP13	2.96877	7.84006	37.2405	9.47277e-203	3.88041e-201	453.322	upregulate	6.686	9.654
TIMM50	1.53671	11.5302	37.2318	1.1017e-202	4.50442e-201	453.171	upregulate	10.933	12.469
C1QTNF6	2.38333	9.22079	37.2263	1.21208e-202	4.94631e-201	453.075	upregulate	8.294	10.677
CCNE1	2.53154	7.07847	37.1761	2.89558e-202	1.1794e-200	452.205	upregulate	6.094	8.626
CALU	1.91373	13.2078	37.0991	1.10168e-201	4.43684e-200	450.87	upregulate	12.464	14.377
KIAA1549L	4.48415	7.855	37.0755	1.65979e-201	6.64721e-200	450.461	upregulate	6.111	10.595
CDCA2	3.59512	6.60925	37.0073	5.41476e-201	2.16048e-199	449.279	upregulate	5.211	8.806
DUSP4	4.30272	11.1333	36.9545	1.35337e-200	5.38994e-199	448.364	upregulate	9.46	13.763
SKA1	3.632	6.25518	36.9201	2.46069e-200	9.74578e-199	447.766	upregulate	4.843	8.475
CNIH3	2.96531	8.04675	36.9117	2.844e-200	1.1202e-198	447.622	upregulate	6.894	9.859
MGAT5B	4.3475	6.35369	36.8798	4.95045e-200	1.93572e-198	447.068	upregulate	4.663	9.01
H2AFZ	1.83956	12.7012	36.8358	1.06219e-199	4.13832e-198	446.305	upregulate	11.986	13.825
P2RX7	3.35358	9.36084	36.8188	1.42578e-199	5.52483e-198	446.011	upregulate	8.057	11.41
BUB1B	3.43212	7.75008	36.77	3.32692e-199	1.27994e-197	445.164	upregulate	6.415	9.847
MND1	2.98255	5.74098	36.7158	8.52574e-199	3.25674e-197	444.224	upregulate	4.581	7.564
PLK1	3.71757	8.36025	36.7108	9.29424e-199	3.54401e-197	444.138	upregulate	6.915	10.632
CENPI	2.84061	6.15264	36.6972	1.17852e-198	4.47796e-197	443.9	upregulate	5.048	7.889
DISC1	2.10245	8.80348	36.6722	1.81901e-198	6.89939e-197	443.467	upregulate	7.986	10.088
PDLIM1P4	2.94702	3.37635	36.519	2.59655e-197	9.74545e-196	440.81	upregulate	2.23	5.177
STMN1	2.20207	12.3546	36.4803	5.09013e-197	1.8972e-195	440.138	upregulate	11.498	13.7
ROPN1B	4.68364	6.27324	36.42	1.44934e-196	5.36479e-195	439.092	upregulate	4.452	9.135
ST3GAL4	2.53479	11.4328	36.403	1.94679e-196	7.16913e-195	438.797	upregulate	10.447	12.982
RNASEH2A	1.88718	9.51272	36.3574	4.30314e-196	1.57119e-194	438.005	upregulate	8.779	10.666
SKA3	3.49219	6.6541	36.3221	7.94317e-196	2.89045e-194	437.392	upregulate	5.296	8.788
NDE1	1.92847	10.3317	36.2945	1.28325e-195	4.63824e-194	436.913	upregulate	9.582	11.51
LDLRAD3	2.85721	9.98522	36.2785	1.69234e-195	6.09641e-194	436.637	upregulate	8.874	11.731
DONSON	1.54588	8.67811	36.2196	4.70578e-195	1.6839e-193	435.615	upregulate	8.077	9.623
RP11-363E6.3	2.87728	3.08293	36.169	1.13509e-194	4.03491e-193	434.735	upregulate	1.964	4.841
CDCA3	2.80321	7.56426	36.1636	1.24609e-194	4.42216e-193	434.642	upregulate	6.474	9.277
MAD1L1	2.00138	10.7601	36.0972	3.95066e-194	1.39283e-192	433.489	upregulate	9.982	11.983
AURKB	4.14089	7.25904	36.0894	4.52075e-194	1.58861e-192	433.354	upregulate	5.649	9.79
PAQR4	2.81798	9.54949	36.0698	6.35314e-194	2.21803e-192	433.014	upregulate	8.454	11.272
CSPG4	4.01441	11.7713	36.0221	1.45538e-193	5.06461e-192	432.186	upregulate	10.21	14.225
LINC00511	4.5592	8.11807	36.0135	1.68985e-193	5.86159e-192	432.037	upregulate	6.345	10.904
GPR137B	2.14923	10.7055	36.004	1.9936e-193	6.89298e-192	431.871	upregulate	9.87	12.019
NUF2	3.42327	6.76447	36.0019	2.06705e-193	7.12404e-192	431.835	upregulate	5.433	8.856
NUSAP1	2.93639	9.04451	35.9766	3.20895e-193	1.10419e-191	431.396	upregulate	7.903	10.839
NCAPH	3.39654	7.40629	35.9194	8.6681e-193	2.96369e-191	430.403	upregulate	6.085	9.482
BLM	2.76975	7.47964	35.9023	1.16748e-192	3.98538e-191	430.105	upregulate	6.403	9.172
CAPN3	4.14956	9.88685	35.9001	1.21327e-192	4.13513e-191	430.067	upregulate	8.273	12.423
LCTL	2.9763	3.64598	35.899	1.23575e-192	4.20507e-191	430.049	upregulate	2.489	5.465
NCAPG	3.53708	7.94014	35.8868	1.52723e-192	5.18872e-191	429.837	upregulate	6.565	10.102
BOP1	1.94164	10.9432	35.8603	2.42017e-192	8.19656e-191	429.377	upregulate	10.188	12.13
ABL2	1.89129	11.1073	35.833	3.89163e-192	1.31387e-190	428.902	upregulate	10.372	12.263
CNP	1.61532	12.7744	35.82	4.87911e-192	1.6421e-190	428.676	upregulate	12.146	13.762
TMEM229B	2.712	9.63816	35.7629	1.31695e-191	4.41158e-190	427.684	upregulate	8.583	11.295
SNHG16	1.66457	12.1977	35.7076	3.44055e-191	1.1454e-189	426.725	upregulate	11.55	13.215
GPNMB	3.31386	13.8718	35.6969	4.14607e-191	1.37814e-189	426.538	upregulate	12.583	15.897
BUB1	3.65842	7.99458	35.6713	6.46558e-191	2.14581e-189	426.094	upregulate	6.572	10.23
TTYH2	2.94033	9.76184	35.6705	6.56055e-191	2.17063e-189	426.08	upregulate	8.618	11.559
CDK5	1.53981	9.54929	35.6473	9.81014e-191	3.24081e-189	425.678	upregulate	8.95	10.49
CKAP2L	3.52674	6.77623	35.6378	1.1581e-190	3.81996e-189	425.512	upregulate	5.405	8.931
STK10	2.24566	11.3264	35.6309	1.30602e-190	4.30127e-189	425.392	upregulate	10.453	12.699
MCM4	1.83765	11.2415	35.6101	1.87243e-190	6.15724e-189	425.032	upregulate	10.527	12.365
UBE2SP2	2.8467	5.64268	35.5859	2.85314e-190	9.33937e-189	424.611	upregulate	4.536	7.382
ST3GAL6	2.78134	10.0629	35.55	5.32808e-190	1.7309e-188	423.987	upregulate	8.981	11.763
TMEM145	3.46354	4.21961	35.5357	6.82245e-190	2.21303e-188	423.74	upregulate	2.873	6.336
GAS7	3.56535	11.8622	35.5263	8.03655e-190	2.59511e-188	423.576	upregulate	10.476	14.041
CTHRC1	4.02796	8.70448	35.517	9.45084e-190	3.04722e-188	423.414	upregulate	7.138	11.166
XRCC2	2.60986	6.43393	35.5015	1.23791e-189	3.98541e-188	423.145	upregulate	5.419	8.029
CCNB1	2.50359	9.53099	35.4995	1.28172e-189	4.12029e-188	423.11	upregulate	8.557	11.061
GLMP	2.02099	11.8759	35.3744	1.12697e-188	3.59595e-187	420.938	upregulate	11.09	13.111
PLOD1	1.6286	12.9648	35.332	2.35671e-188	7.49756e-187	420.201	upregulate	12.331	13.96
ARPC1B	2.35677	13.1069	35.2786	5.95626e-188	1.88931e-186	419.274	upregulate	12.19	14.547
UHRF1	3.75211	8.14434	35.2715	6.73826e-188	2.13108e-186	419.151	upregulate	6.685	10.437
UCN2	5.28435	4.15041	35.2669	7.30095e-188	2.30564e-186	419.071	upregulate	2.095	7.38
E2F3	1.59649	9.85878	35.1805	3.27837e-187	1.02478e-185	417.57	upregulate	9.238	10.834
CDCA8	3.08141	8.05388	35.0929	1.50356e-186	4.67955e-185	416.048	upregulate	6.856	9.937
RAB38	3.66942	9.11704	35.071	2.20301e-186	6.81697e-185	415.667	upregulate	7.69	11.359
LINGO1	3.41858	8.11927	35.0702	2.2315e-186	6.8952e-185	415.654	upregulate	6.79	10.208
TUBB	1.60599	15.1034	35.0635	2.50845e-186	7.73984e-185	415.537	upregulate	14.479	16.085
ATP2A1-AS1	2.66772	3.90866	35.0526	3.03098e-186	9.31204e-185	415.348	upregulate	2.871	5.539
RENBP	3.103	9.87827	35.0157	5.76129e-186	1.75997e-184	414.706	upregulate	8.672	11.775
RCC2	1.74406	12.5733	34.9602	1.51213e-185	4.5997e-184	413.742	upregulate	11.895	13.639
C1ORF216	1.97301	9.85975	34.9179	3.15466e-185	9.55552e-184	413.007	upregulate	9.092	11.065
FAM72A	2.50201	6.30285	34.8756	6.58042e-185	1.98483e-183	412.273	upregulate	5.33	7.832
KCTD15	1.96434	10.8408	34.8287	1.48839e-184	4.44573e-183	411.457	upregulate	10.077	12.041
RP11-424C20.2	3.61181	3.97919	34.8284	1.49604e-184	4.46238e-183	411.452	upregulate	2.575	6.186
AGAP2-AS1	2.54587	8.69279	34.7289	8.42572e-184	2.48565e-182	409.725	upregulate	7.703	10.249
PIK3CD-AS2	2.9303	6.47328	34.7214	9.61098e-184	2.82755e-182	409.593	upregulate	5.334	8.264
CEP170P1	3.24467	4.76847	34.6991	1.41647e-183	4.13331e-182	409.206	upregulate	3.507	6.751
DPF1	3.11563	3.98084	34.6543	3.08693e-183	8.94711e-182	408.428	upregulate	2.769	5.885
CCNF	2.40193	8.7645	34.6454	3.60234e-183	1.04129e-181	408.273	upregulate	7.83	10.232
MCM10	3.46277	6.44146	34.64	3.95635e-183	1.14208e-181	408.18	upregulate	5.095	8.558
FAM72B	2.73161	5.73612	34.5627	1.5175e-182	4.33981e-181	406.836	upregulate	4.674	7.405
SHCBP1	3.08871	7.74888	34.5411	2.20704e-182	6.27839e-181	406.462	upregulate	6.548	9.636
NUDT1	2.06412	8.94095	34.524	2.97392e-182	8.43761e-181	406.164	upregulate	8.138	10.202
C6ORF1	1.77328	10.097	34.4849	5.86387e-182	1.65932e-180	405.486	upregulate	9.407	11.181
QPCT	3.80426	9.93187	34.4836	6.00412e-182	1.69678e-180	405.462	upregulate	8.452	12.257
FKBP10	2.69966	11.7814	34.4408	1.26387e-181	3.54379e-180	404.719	upregulate	10.732	13.431
RP11-551L14.1	4.07279	5.09067	34.3767	3.84856e-181	1.0735e-179	403.606	upregulate	3.507	7.58
NEIL3	3.58033	4.72926	34.3707	4.27466e-181	1.19081e-179	403.501	upregulate	3.337	6.917
UAP1L1	1.92521	9.97797	34.3218	1.00008e-180	2.76804e-179	402.652	upregulate	9.229	11.154
SLC6A17	5.52175	7.0454	34.3074	1.28455e-180	3.53267e-179	402.402	upregulate	4.898	10.42
CBX4	1.72703	10.4553	34.2272	5.18299e-180	1.40385e-178	401.008	upregulate	9.784	11.511
CDKN3	3.03902	6.95506	34.1431	2.23371e-179	5.99728e-178	399.548	upregulate	5.773	8.812
CAD	1.68455	11.337	34.1308	2.76912e-179	7.42553e-178	399.334	upregulate	10.682	12.366
LHX2	4.51727	3.57864	34.1021	4.55831e-179	1.21627e-177	398.836	upregulate	1.822	6.339
INCENP	1.97945	9.83315	34.0853	6.10599e-179	1.62519e-177	398.543	upregulate	9.063	11.043
SOX12	1.73032	10.2463	34.0476	1.17547e-178	3.11325e-177	397.889	upregulate	9.573	11.304
GINS1	2.24165	7.96517	34.0203	1.89031e-178	4.96979e-177	397.414	upregulate	7.093	9.335
METRN	2.10089	10.3074	33.9958	2.89426e-178	7.57226e-177	396.989	upregulate	9.49	11.591
ASPM	3.76865	7.70582	33.9813	3.72568e-178	9.73567e-177	396.736	upregulate	6.24	10.009
LYST	2.21271	11.4039	33.9745	4.18682e-178	1.09142e-176	396.62	upregulate	10.543	12.756
FOXD2-AS1	2.72282	6.92699	33.9591	5.47778e-178	1.42105e-176	396.351	upregulate	5.868	8.591
RP11-42I10.1	2.3102	3.9994	33.8461	3.90462e-177	9.98487e-176	394.389	upregulate	3.101	5.411
SLC7A5P1	2.64368	2.66223	33.8427	4.1454e-177	1.0588e-175	394.329	upregulate	1.634	4.278
VAT1	1.99263	13.9062	33.8336	4.85378e-177	1.23679e-175	394.172	upregulate	13.131	15.124
CDT1	3.21445	8.05661	33.7751	1.34232e-176	3.36849e-175	393.155	upregulate	6.807	10.021
LINC00920	3.1574	6.67335	33.7707	1.44678e-176	3.6264e-175	393.08	upregulate	5.445	8.603
PLXNB3	3.77837	9.0737	33.7003	4.92507e-176	1.22875e-174	391.856	upregulate	7.604	11.383
UBE2SP1	2.92373	4.95976	33.6875	6.14789e-176	1.52851e-174	391.635	upregulate	3.823	6.746
SGOL1	3.02048	5.97281	33.639	1.42916e-175	3.52067e-174	390.792	upregulate	4.798	7.819
RAD51	2.69469	7.10419	33.5219	1.09334e-174	2.65389e-173	388.759	upregulate	6.056	8.751
INPP5F	2.04245	10.7294	33.5108	1.32508e-174	3.20553e-173	388.567	upregulate	9.935	11.978
IRF4	4.43276	8.83015	33.4665	2.8623e-174	6.89324e-173	387.797	upregulate	7.106	11.539
MTHFD1L	2.02564	9.83813	33.4283	5.56256e-174	1.33217e-172	387.134	upregulate	9.05	11.076
CDCA4	1.94651	9.23861	33.4262	5.76419e-174	1.37892e-172	387.098	upregulate	8.482	10.428
PLXNC1	3.13595	10.6169	33.3927	1.03213e-173	2.46359e-172	386.516	upregulate	9.397	12.533
IFI16	2.33033	12.5865	33.3883	1.11407e-173	2.65623e-172	386.44	upregulate	11.68	14.011
ZNF280B	2.88437	6.88898	33.3852	1.17556e-173	2.79974e-172	386.386	upregulate	5.767	8.652
PTTG1	3.53142	8.90262	33.3736	1.43839e-173	3.4219e-172	386.184	upregulate	7.529	11.061
EZH2	2.5376	8.37103	33.3531	2.05172e-173	4.87022e-172	385.83	upregulate	7.384	9.922
PRR7	2.92981	6.52059	33.3149	3.98469e-173	9.43774e-172	385.166	upregulate	5.381	8.311
NEK2	3.61835	6.78639	33.2996	5.20171e-173	1.22932e-171	384.9	upregulate	5.379	8.998
SDCBP	1.99838	13.9685	33.2771	7.68466e-173	1.81015e-171	384.51	upregulate	13.191	15.19
MITF	2.90991	11.3126	33.2407	1.44639e-172	3.37743e-171	383.878	upregulate	10.181	13.091
CDC20	3.53259	8.47335	33.2146	2.27607e-172	5.30326e-171	383.425	upregulate	7.1	10.632
STK32A	3.85767	8.55874	33.2136	2.31849e-172	5.39626e-171	383.407	upregulate	7.059	10.916
CYTH3	2.17207	11.6524	33.2093	2.49751e-172	5.80038e-171	383.332	upregulate	10.808	12.98
KIF3C	2.2258	9.77079	33.1996	2.95507e-172	6.85564e-171	383.164	upregulate	8.905	11.131
MYBL2	4.35918	8.25623	33.1868	3.69074e-172	8.55313e-171	382.942	upregulate	6.561	10.92
TEX41	4.07161	5.84574	33.1202	1.1737e-171	2.70833e-170	381.786	upregulate	4.262	8.334
DNMT1	1.58579	11.4706	33.1118	1.35871e-171	3.13189e-170	381.64	upregulate	10.854	12.44
LIG1	1.71405	10.4229	33.1094	1.41446e-171	3.2569e-170	381.6	upregulate	9.756	11.47
FZD9	3.45915	5.62635	33.1053	1.51995e-171	3.49605e-170	381.528	upregulate	4.281	7.74
TFAP2A	5.18915	9.72183	33.0956	1.79842e-171	4.12772e-170	381.36	upregulate	7.704	12.893
JARID2	1.71038	10.5117	32.9546	2.08282e-170	4.72502e-169	378.913	upregulate	9.847	11.557
ORC1	2.75091	6.8741	32.952	2.17774e-170	4.93513e-169	378.868	upregulate	5.804	8.555
TACC3	2.35728	9.86805	32.9367	2.84155e-170	6.42217e-169	378.602	upregulate	8.951	11.309
MELK	3.67552	7.04108	32.9342	2.96941e-170	6.70095e-169	378.558	upregulate	5.612	9.287
IGF2BP3	4.44933	5.16168	32.8907	6.31975e-170	1.41871e-168	377.804	upregulate	3.431	7.881
CBX2	2.70765	7.8308	32.8694	9.13488e-170	2.0464e-168	377.436	upregulate	6.778	9.485
DLGAP5	3.85576	7.05501	32.8427	1.45209e-169	3.23613e-168	376.973	upregulate	5.556	9.411
CDC25C	3.39668	5.41018	32.8247	1.98695e-169	4.41896e-168	376.659	upregulate	4.089	7.486
CHAF1A	1.75581	9.58795	32.8141	2.38716e-169	5.29807e-168	376.476	upregulate	8.905	10.661
MAD2L2	1.58198	10.214	32.7936	3.40798e-169	7.5481e-168	376.12	upregulate	9.599	11.181
FANCB	2.21321	5.09573	32.771	5.045e-169	1.11166e-167	375.728	upregulate	4.235	6.448
TRPV2	3.2423	10.2931	32.7379	8.95629e-169	1.96344e-167	375.155	upregulate	9.032	12.275
CD63	1.72053	15.2472	32.7258	1.10656e-168	2.42093e-167	374.944	upregulate	14.578	16.299
BACE2	2.27553	12.4773	32.6549	3.78501e-168	8.23059e-167	373.715	upregulate	11.592	13.868
ALK	3.75884	4.82933	32.6513	4.03057e-168	8.75571e-167	373.652	upregulate	3.368	7.126
EMP3	2.55586	11.3437	32.597	1.03368e-167	2.23871e-166	372.711	upregulate	10.35	12.906
MYO10	2.29702	12.6406	32.5939	1.09113e-167	2.36075e-166	372.657	upregulate	11.747	14.044
NME2	1.95491	9.3928	32.5139	4.36894e-167	9.38645e-166	371.271	upregulate	8.633	10.587
EFR3B	3.12562	8.87706	32.511	4.59825e-167	9.85942e-166	371.22	upregulate	7.662	10.787
CDC25A	2.34646	7.53676	32.4476	1.38176e-166	2.93638e-165	370.121	upregulate	6.624	8.971
TICRR	3.19585	6.76062	32.4397	1.5844e-166	3.36036e-165	369.984	upregulate	5.518	8.714
LBX2	2.88575	4.5321	32.3991	3.20613e-166	6.76653e-165	369.28	upregulate	3.41	6.296
CTD-2510F5.4	2.40534	2.52332	32.3886	3.84304e-166	8.08693e-165	369.099	upregulate	1.588	3.993
TOP2A	3.51911	9.80533	32.3795	4.50229e-166	9.46493e-165	368.94	upregulate	8.437	11.956
EDNRB	2.9643	12.1902	32.3567	6.68554e-166	1.40272e-164	368.545	upregulate	11.037	14.002
CDC7	2.10143	7.88883	32.3528	7.15298e-166	1.49934e-164	368.478	upregulate	7.072	9.173
WDHD1	1.88018	8.47605	32.2967	1.89322e-165	3.95296e-164	367.505	upregulate	7.745	9.625
S100A1	4.8876	10.5403	32.2208	7.05504e-165	1.46453e-163	366.191	upregulate	8.64	13.527
C11ORF24	1.7086	11.1791	32.1961	1.08261e-164	2.23872e-163	365.763	upregulate	10.515	12.223
AL589743.1	3.67888	6.43604	32.1545	2.22982e-164	4.58018e-163	365.041	upregulate	5.005	8.684
C17ORF53	2.13847	6.76083	32.1392	2.906e-164	5.95772e-163	364.777	upregulate	5.929	8.068
EXOSC4	1.63598	9.97571	32.0835	7.63114e-164	1.55707e-162	363.812	upregulate	9.339	10.975
GPM6B	3.26875	10.8016	32.0705	9.55067e-164	1.9432e-162	363.588	upregulate	9.53	12.799
DLX1	4.43606	4.2843	32.0572	1.20264e-163	2.4423e-162	363.358	upregulate	2.559	6.995
CENPL	1.58851	7.7633	32.0517	1.32366e-163	2.68552e-162	363.262	upregulate	7.146	8.734
DBNDD1	2.2973	9.90611	32.0267	2.04177e-163	4.13078e-162	362.829	upregulate	9.013	11.31
ASF1B	2.99857	8.20309	31.9521	7.44082e-163	1.49414e-161	361.537	upregulate	7.037	10.036
GJA3	4.54762	5.10305	31.8482	4.49836e-162	8.95757e-161	359.739	upregulate	3.335	7.882
POC1A	1.91905	7.97655	31.8354	5.61472e-162	1.11496e-160	359.518	upregulate	7.23	9.149
PIF1	2.68862	6.00978	31.7558	2.23157e-161	4.39891e-160	358.139	upregulate	4.964	7.653
CA14	4.48944	7.2062	31.7406	2.90391e-161	5.719e-160	357.876	upregulate	5.46	9.95
TMPRSS5	2.88681	4.60341	31.7061	5.27281e-161	1.03088e-159	357.28	upregulate	3.481	6.368
DDX39A	1.57999	11.0481	31.7019	5.67605e-161	1.1057e-159	357.207	upregulate	10.434	12.014
HERC2P10	2.28666	2.42485	31.6782	8.55714e-161	1.66392e-159	356.796	upregulate	1.536	3.822
RP11-809C18.3	3.00747	2.57818	31.6644	1.08649e-160	2.10695e-159	356.558	upregulate	1.409	4.416
CHAF1B	2.0048	8.51812	31.655	1.27729e-160	2.47472e-159	356.396	upregulate	7.738	9.743
CENPN	1.64785	8.55153	31.6442	1.54217e-160	2.98255e-159	356.208	upregulate	7.911	9.559
CCNB2	3.12508	7.96825	31.6231	2.22236e-160	4.29417e-159	355.843	upregulate	6.753	9.878
TRAIP	1.89349	7.14692	31.6188	2.39102e-160	4.61591e-159	355.77	upregulate	6.411	8.304
RP3-412A9.16	2.06618	5.54515	31.6172	2.4611e-160	4.74695e-159	355.741	upregulate	4.742	6.808
VAX2	3.14246	4.43831	31.5703	5.53886e-160	1.06546e-158	354.931	upregulate	3.216	6.359
NFKBIE	1.77573	9.98841	31.5634	6.23871e-160	1.19901e-158	354.812	upregulate	9.298	11.074
LINC00622	2.84306	6.40819	31.5495	7.94524e-160	1.52291e-158	354.57	upregulate	5.303	8.146
CD276	1.69194	12.0287	31.5334	1.0499e-159	2.00526e-158	354.292	upregulate	11.371	13.063
GAPDH	1.61698	16.7603	31.5234	1.24724e-159	2.38004e-158	354.12	upregulate	16.132	17.748
FRMD5	3.91268	6.31715	31.5032	1.77078e-159	3.3731e-158	353.769	upregulate	4.796	8.708
ERCC6L	2.82898	5.89483	31.4467	4.70691e-159	8.93441e-158	352.793	upregulate	4.795	7.624
DDX11-AS1	1.88533	4.42776	31.4221	7.20274e-159	1.36357e-157	352.368	upregulate	3.695	5.58
AC007040.11	2.96463	3.07562	31.3882	1.29346e-158	2.43582e-157	351.783	upregulate	1.923	4.887
ABCD1	2.11956	10.4395	31.354	2.33858e-158	4.40012e-157	351.191	upregulate	9.615	11.735
GINS2	2.33847	8.04823	31.3353	3.2304e-158	6.06752e-157	350.868	upregulate	7.139	9.477
ANXA5	1.70699	14.3718	31.3215	4.10322e-158	7.68674e-157	350.629	upregulate	13.708	15.415
MCM7	1.55979	11.9665	31.3189	4.29001e-158	8.02967e-157	350.585	upregulate	11.36	12.92
SPC25	3.09109	6.11458	31.2257	2.15276e-157	3.99114e-156	348.973	upregulate	4.912	8.004
GAL3ST4	2.80179	9.01462	31.219	2.41513e-157	4.46986e-156	348.859	upregulate	7.925	10.727
GPR143	4.60792	8.46964	31.1548	7.32907e-157	1.34948e-155	347.75	upregulate	6.678	11.286
AC025048.1	3.26536	3.73667	31.1499	7.98273e-157	1.46732e-155	347.664	upregulate	2.467	5.732
HES6	2.81573	8.23108	31.0969	1.99435e-156	3.64716e-155	346.749	upregulate	7.136	9.952
HMCN1	3.1842	10.916	31.0529	4.26491e-156	7.77297e-155	345.99	upregulate	9.678	12.862
MYO9B	1.69472	12.3295	31.042	5.15503e-156	9.37143e-155	345.801	upregulate	11.67	13.365
HCG20	2.94525	3.10956	30.9762	1.60453e-155	2.89003e-154	344.666	upregulate	1.964	4.909
KNTC1	1.64951	9.25756	30.9664	1.90137e-155	3.41896e-154	344.497	upregulate	8.616	10.266
2021-09-03	3.91038	7.73767	30.9576	2.21463e-155	3.97562e-154	344.344	upregulate	6.217	10.127
TMCC1-AS1	2.04061	6.31115	30.9539	2.35838e-155	4.23013e-154	344.282	upregulate	5.518	7.558
KIAA1024	2.88565	6.28211	30.8989	6.10597e-155	1.08975e-153	343.331	upregulate	5.16	8.046
DBF4B	1.52956	8.17981	30.8341	1.86839e-154	3.31805e-153	342.214	upregulate	7.585	9.115
RP5-1054A22.4	2.77376	2.8895	30.8319	1.94156e-154	3.44514e-153	342.176	upregulate	1.811	4.585
HMG20B	1.54704	11.9518	30.8284	2.0611e-154	3.65424e-153	342.116	upregulate	11.35	12.897
CENPM	3.15186	7.17015	30.8267	2.1237e-154	3.76107e-153	342.086	upregulate	5.944	9.096
RP11-390P2.4	1.84607	5.94703	30.8193	2.41283e-154	4.2673e-153	341.958	upregulate	5.229	7.075
KREMEN2	4.04524	4.3939	30.8184	2.45008e-154	4.32962e-153	341.943	upregulate	2.821	6.866
CEP55	3.29787	7.44919	30.8002	3.35544e-154	5.90525e-153	341.629	upregulate	6.167	9.465
RHPN1-AS1	2.06667	5.98661	30.7225	1.28386e-153	2.24294e-152	340.288	upregulate	5.183	7.25
LINC01540	3.47584	4.55027	30.7031	1.79512e-153	3.12346e-152	339.953	upregulate	3.199	6.674
MCM5	1.63773	11.2096	30.7008	1.8653e-153	3.24293e-152	339.915	upregulate	10.573	12.21
RRM2	3.50305	8.95872	30.672	3.06926e-153	5.31035e-152	339.418	upregulate	7.596	11.099
RP3-522D1.1	2.80878	3.00974	30.632	6.11637e-153	1.05484e-151	338.729	upregulate	1.917	4.726
CD320	1.63162	11.0032	30.6312	6.2035e-153	1.06815e-151	338.715	upregulate	10.369	12
ATAD3A	1.59958	10.5381	30.6277	6.5862e-153	1.13314e-151	338.655	upregulate	9.916	11.516
RNF157	2.60419	9.36706	30.6041	9.90832e-153	1.69792e-151	338.247	upregulate	8.354	10.959
COL11A2	3.81224	7.08121	30.6	1.06308e-152	1.82026e-151	338.177	upregulate	5.599	9.411
AEN	1.56569	10.4187	30.5026	5.7034e-152	9.68857e-151	336.498	upregulate	9.81	11.375
ASAP1	1.62707	11.3101	30.4888	7.23103e-152	1.22739e-150	336.261	upregulate	10.677	12.304
AC005592.2	2.15332	2.79525	30.3332	1.05664e-150	1.77256e-149	333.582	upregulate	1.958	4.111
SEMA7A	2.81278	9.04951	30.299	1.90662e-150	3.19345e-149	332.992	upregulate	7.956	10.768
PSMC3IP	1.76793	7.46493	30.2721	3.02904e-150	5.042e-149	332.53	upregulate	6.777	8.545
C19ORF26	2.74536	5.9893	30.2304	6.21581e-150	1.03066e-148	331.812	upregulate	4.922	7.667
NDC80	2.82052	7.37958	30.2232	7.03465e-150	1.16554e-148	331.688	upregulate	6.283	9.103
MAD2L1	2.03734	8.60015	30.2112	8.64885e-150	1.42969e-148	331.482	upregulate	7.808	9.845
SHOX2	4.00453	5.1158	30.1941	1.16083e-149	1.91448e-148	331.188	upregulate	3.558	7.563
HMGA1	2.43493	12.4438	30.1273	3.66576e-149	5.99513e-148	330.039	upregulate	11.497	13.932
POLQ	2.96405	6.25518	30.0454	1.50225e-148	2.42912e-147	328.63	upregulate	5.102	8.067
BRIP1	2.53157	7.01953	30.0304	1.94489e-148	3.13779e-147	328.372	upregulate	6.035	8.567
FAM72C	3.32756	4.66179	29.9727	5.24869e-148	8.43004e-147	327.38	upregulate	3.368	6.695
TRIM9	3.11267	7.39623	29.9095	1.55584e-147	2.48772e-146	326.295	upregulate	6.186	9.298
BTN2A2	1.7731	9.86085	29.8788	2.64142e-147	4.19544e-146	325.766	upregulate	9.171	10.944
ZWINT	2.03785	9.13182	29.8783	2.66086e-147	4.2232e-146	325.759	upregulate	8.339	10.377
RP11-340F14.6	2.73088	3.33132	29.8686	3.14292e-147	4.98096e-146	325.592	upregulate	2.269	5
STXBP1	2.30857	11.7317	29.859	3.71155e-147	5.87349e-146	325.426	upregulate	10.834	13.142
IGSF8	1.70097	11.9688	29.8442	4.78198e-147	7.56186e-146	325.173	upregulate	11.307	13.008
CTB-193M12.5	2.05535	7.26778	29.8127	8.22954e-147	1.29754e-145	324.631	upregulate	6.468	8.524
DDX12P	2.13538	5.55598	29.7481	2.49531e-146	3.90853e-145	323.522	upregulate	4.726	6.861
NRP2	2.56927	12.0253	29.7396	2.88847e-146	4.52107e-145	323.376	upregulate	11.026	13.595
CENPU	2.39491	8.12982	29.736	3.0752e-146	4.80984e-145	323.314	upregulate	7.198	9.593
EIF4EBP1	2.03085	10.406	29.6969	6.01295e-146	9.33679e-145	322.644	upregulate	9.616	11.647
P2RX6	2.91866	6.00989	29.674	8.91722e-146	1.38066e-144	322.25	upregulate	4.875	7.794
FANCD2	1.89617	8.70083	29.6507	1.33109e-145	2.05355e-144	321.85	upregulate	7.963	9.86
KIAA0101	2.77842	7.73202	29.6458	1.44736e-145	2.23132e-144	321.766	upregulate	6.652	9.43
CHST6	3.91096	7.12241	29.645	1.46624e-145	2.25881e-144	321.753	upregulate	5.601	9.512
LINC01356	2.56006	3.0566	29.5739	4.97095e-145	7.61976e-144	320.534	upregulate	2.061	4.621
TRIB3	2.29847	9.92145	29.5736	5.00436e-145	7.6655e-144	320.527	upregulate	9.028	11.326
GSG2	2.80293	5.58019	29.526	1.13177e-144	1.72256e-143	319.712	upregulate	4.49	7.293
AP3M2	1.57081	10.229	29.521	1.2342e-144	1.87581e-143	319.625	upregulate	9.618	11.189
WARS	2.24194	13.5429	29.5065	1.58262e-144	2.39858e-143	319.377	upregulate	12.671	14.913
CCNA2	2.81532	8.17599	29.5036	1.66421e-144	2.52046e-143	319.327	upregulate	7.081	9.896
CDC25B	1.77886	11.3114	29.4998	1.77531e-144	2.68494e-143	319.262	upregulate	10.62	12.398
HRK	3.97221	5.79943	29.4989	1.80201e-144	2.72149e-143	319.247	upregulate	4.255	8.227
FCRLB	2.00948	6.25149	29.3885	1.19733e-143	1.79191e-142	317.355	upregulate	5.47	7.48
QPCTL	1.52759	9.31351	29.3782	1.42958e-143	2.138e-142	317.178	upregulate	8.719	10.247
IFFO1	1.77782	9.54559	29.374	1.53532e-143	2.29296e-142	317.107	upregulate	8.854	10.632
AEBP1	2.38726	13.9788	29.2866	6.88088e-143	1.01775e-141	315.609	upregulate	13.05	15.438
MFI2	3.443	10.0757	29.2613	1.06086e-142	1.56373e-141	315.176	upregulate	8.737	12.18
CHTF18	1.89818	8.678	29.1741	4.72674e-142	6.9058e-141	313.683	upregulate	7.94	9.838
SPAG5	2.09311	9.45061	29.142	8.1987e-142	1.19459e-140	313.133	upregulate	8.637	10.73
TBC1D16	2.04696	12.3306	29.1353	9.18423e-142	1.33601e-140	313.02	upregulate	11.535	13.581
TMEM206	1.5572	8.64504	29.1162	1.27474e-141	1.85109e-140	312.692	upregulate	8.039	9.597
RP11-472N13.3	2.52168	2.53902	29.0972	1.76433e-141	2.54827e-140	312.368	upregulate	1.558	4.08
MKI67	3.4229	9.69805	29.0577	3.47236e-141	5.00849e-140	311.691	upregulate	8.367	11.79
PIR	2.44488	9.96884	29.0504	3.9317e-141	5.66723e-140	311.567	upregulate	9.018	11.463
FANCA	2.16076	8.42065	28.9587	1.88716e-140	2.69491e-139	310	upregulate	7.58	9.741
MAMLD1	1.88719	8.91405	28.8895	6.17287e-140	8.76263e-139	308.817	upregulate	8.18	10.067
RP11-465L10.10	2.71554	2.61848	28.8508	1.1963e-139	1.69372e-138	308.156	upregulate	1.562	4.278
HMGA2	4.52242	5.47928	28.8098	2.40961e-139	3.39587e-138	307.456	upregulate	3.721	8.243
AC004967.7	1.63678	3.79518	28.7454	7.24978e-139	1.01639e-137	306.356	upregulate	3.159	4.795
ARHGAP11A	2.26016	8.42545	28.7297	9.47781e-139	1.32443e-137	306.088	upregulate	7.546	9.807
SLC52A2	1.62497	11.0036	28.7164	1.1881e-138	1.65594e-137	305.862	upregulate	10.372	11.997
CEP131	1.60127	9.39491	28.7094	1.33922e-138	1.86536e-137	305.743	upregulate	8.772	10.373
ABCB5	5.43222	5.36083	28.5939	9.62516e-138	1.32522e-136	303.773	upregulate	3.248	8.681
PIK3CD	2.04669	10.5138	28.5676	1.50734e-137	2.06477e-136	303.325	upregulate	9.718	11.765
H2AFZP3	1.79997	2.11985	28.5655	1.56403e-137	2.14105e-136	303.288	upregulate	1.42	3.22
KIF11	2.16743	8.81087	28.5368	2.55364e-137	3.48468e-136	302.798	upregulate	7.968	10.135
BRCA1	1.63395	8.89695	28.5245	3.14813e-137	4.29048e-136	302.589	upregulate	8.262	9.895
HIST3H2A	2.68789	7.56548	28.4853	6.14756e-137	8.33077e-136	301.92	upregulate	6.52	9.208
FAM72D	2.78191	5.12097	28.4792	6.82099e-137	9.22593e-136	301.817	upregulate	4.039	6.821
ST3GAL5	2.37455	10.6139	28.4691	8.09183e-137	1.09242e-135	301.646	upregulate	9.69	12.065
D4S234E	4.59495	9.15756	28.4375	1.38779e-136	1.86886e-135	301.107	upregulate	7.371	11.966
GBAP1	1.5712	7.33346	28.4149	2.04167e-136	2.74426e-135	300.721	upregulate	6.722	8.294
STRIP2	2.61747	7.09905	28.3957	2.82843e-136	3.78756e-135	300.396	upregulate	6.081	8.699
CEP170	1.70432	11.0916	28.2623	2.74606e-135	3.61204e-134	298.125	upregulate	10.429	12.133
RACGAP1	1.77482	9.67954	28.2547	3.12907e-135	4.11331e-134	297.995	upregulate	8.989	10.764
TTK	2.78146	6.98551	28.2128	6.38265e-135	8.33427e-134	297.283	upregulate	5.904	8.685
MGC16275	2.31895	5.50265	28.1435	2.07739e-134	2.69948e-133	296.104	upregulate	4.601	6.92
BCL2A1	3.64375	8.01059	28.0883	5.31305e-134	6.87086e-133	295.166	upregulate	6.594	10.237
RP11-34F20.7	1.91228	3.18422	28.0228	1.6161e-133	2.07374e-132	294.055	upregulate	2.441	4.353
RNF144A-AS1	2.88482	4.98085	28.0049	2.19352e-133	2.80462e-132	293.75	upregulate	3.859	6.744
ESPL1	2.85978	8.13937	27.9415	6.43605e-133	8.17082e-132	292.674	upregulate	7.027	9.887
RP11-523H20.3	1.86597	2.6866	27.8874	1.61468e-132	2.04387e-131	291.756	upregulate	1.961	3.827
ESCO2	2.8329	6.33242	27.8867	1.63296e-132	2.06579e-131	291.744	upregulate	5.231	8.064
MCM2	1.71141	10.3257	27.8846	1.6929e-132	2.14036e-131	291.708	upregulate	9.66	11.372
MFGE8	2.3514	12.8757	27.8399	3.6177e-132	4.54452e-131	290.95	upregulate	11.961	14.313
DEPDC1	3.16731	6.75035	27.8138	5.63511e-132	7.04585e-131	290.507	upregulate	5.519	8.686
TCF19	1.71918	9.62609	27.7771	1.05065e-131	1.30835e-130	289.885	upregulate	8.958	10.677
OIP5	2.37283	5.65398	27.7548	1.5328e-131	1.90435e-130	289.508	upregulate	4.731	7.104
TYRO3	2.51162	10.2697	27.7518	1.61274e-131	1.99905e-130	289.457	upregulate	9.293	11.805
PYCR1	2.68039	10.114	27.721	2.71905e-131	3.36068e-130	288.935	upregulate	9.072	11.752
KIRREL	1.90036	11.8103	27.7087	3.34758e-131	4.13042e-130	288.728	upregulate	11.071	12.972
C19ORF57	1.95231	6.81719	27.7049	3.574e-131	4.40473e-130	288.662	upregulate	6.058	8.01
OPRD1	3.11768	4.92784	27.6606	7.57963e-131	9.27761e-130	287.911	upregulate	3.715	6.833
MAP3K12	1.71293	9.42265	27.6422	1.03505e-130	1.26333e-129	287.6	upregulate	8.757	10.469
CCSAP	1.64957	9.27447	27.6272	1.3332e-130	1.62171e-129	287.347	upregulate	8.633	10.283
DIRAS1	3.31375	8.46567	27.5819	2.87639e-130	3.47917e-129	286.579	upregulate	7.177	10.491
TK1	2.38593	9.64664	27.5522	4.75341e-130	5.73663e-129	286.077	upregulate	8.719	11.105
SYDE1	1.71378	10.3019	27.5093	9.83489e-130	1.17898e-128	285.351	upregulate	9.635	11.349
RP11-360L9.7	2.42201	4.09563	27.4343	3.49839e-129	4.17284e-128	284.084	upregulate	3.154	5.576
LOXL3	2.76987	8.5403	27.3913	7.24613e-129	8.61445e-128	283.356	upregulate	7.463	10.233
STIL	1.86888	7.81008	27.3692	1.05257e-128	1.24926e-127	282.983	upregulate	7.083	8.952
LIMK1	1.64435	10.8931	27.3513	1.42412e-128	1.68652e-127	282.681	upregulate	10.254	11.898
CPB2-AS1	2.46098	4.20975	27.3495	1.46965e-128	1.73947e-127	282.65	upregulate	3.253	5.714
VIM	2.1584	16.3034	27.2749	5.18561e-128	6.08411e-127	281.391	upregulate	15.464	17.622
PFKFB4	2.17114	8.74772	27.2668	5.94194e-128	6.96009e-127	281.255	upregulate	7.903	10.075
SOX8	3.46688	7.03298	27.2391	9.48324e-128	1.1042e-126	280.788	upregulate	5.685	9.152
C19ORF71	2.10968	4.87328	27.2015	1.7896e-127	2.08039e-126	280.153	upregulate	4.053	6.163
PAFAH1B3	1.71826	9.7104	27.1285	6.13775e-127	7.07008e-126	278.922	upregulate	9.042	10.76
HCN2	3.36783	5.82213	27.1059	8.99586e-127	1.03513e-125	278.541	upregulate	4.512	7.88
PHF19	1.61398	10.3235	27.0399	2.737e-126	3.12763e-125	277.429	upregulate	9.696	11.31
LYPD1	3.29246	7.23642	27.028	3.34915e-126	3.82308e-125	277.228	upregulate	5.956	9.248
MARCKSL1	2.08895	12.6526	27.0084	4.65708e-126	5.30764e-125	276.898	upregulate	11.84	13.929
PLEKHG4	2.3423	9.16299	26.9881	6.55479e-126	7.45859e-125	276.557	upregulate	8.252	10.594
POPDC3	3.73782	5.27057	26.9782	7.7435e-126	8.79724e-125	276.391	upregulate	3.817	7.555
LMNB2	1.58013	11.2839	26.9714	8.68761e-126	9.85421e-125	276.276	upregulate	10.669	12.25
TNFRSF14	1.78223	11.8636	26.9086	2.50172e-125	2.81981e-124	275.219	upregulate	11.171	12.953
DSCC1	1.69842	7.33405	26.7934	1.74178e-124	1.93286e-123	273.281	upregulate	6.674	8.372
FAM69C	3.99178	4.89909	26.7897	1.85133e-124	2.05336e-123	273.22	upregulate	3.347	7.339
KIF15	2.54726	6.91067	26.7499	3.61938e-124	3.99376e-123	272.551	upregulate	5.92	8.467
NRROS	2.13456	9.01808	26.7161	6.39269e-124	7.02151e-123	271.982	upregulate	8.188	10.323
WDR76	1.52577	8.33846	26.6722	1.33555e-123	1.45651e-122	271.247	upregulate	7.745	9.271
CDK1	2.21806	8.73981	26.6519	1.88072e-123	2.0438e-122	270.905	upregulate	7.877	10.095
GYPC	2.02137	11.4122	26.6273	2.84062e-123	3.0776e-122	270.493	upregulate	10.626	12.648
C5ORF34	1.60752	6.52051	26.6093	3.84566e-123	4.1602e-122	270.19	upregulate	5.895	7.503
LL22NC03-N14H11.1	3.08171	5.11622	26.5781	6.49463e-123	7.00469e-122	269.667	upregulate	3.918	6.999
A1BG-AS1	1.73843	7.56432	26.5015	2.34649e-122	2.51312e-121	268.384	upregulate	6.888	8.627
ATP8B2	1.69221	11.3151	26.4931	2.70179e-122	2.89222e-121	268.243	upregulate	10.657	12.349
ISYNA1	1.96387	11.1379	26.4865	3.0214e-122	3.23114e-121	268.131	upregulate	10.374	12.338
TUBB2B	2.68022	9.62897	26.4658	4.27045e-122	4.55105e-121	267.786	upregulate	8.587	11.267
PRR19	1.78382	5.61985	26.4503	5.54212e-122	5.88006e-121	267.526	upregulate	4.926	6.71
KCNAB2	2.62552	10.7792	26.406	1.16406e-121	1.22897e-120	266.784	upregulate	9.758	12.384
RP11-466A19.8	2.09538	2.21923	26.3901	1.52007e-121	1.60248e-120	266.518	upregulate	1.404	3.5
CITED1	3.92604	6.68388	26.3755	1.94282e-121	2.04514e-120	266.273	upregulate	5.157	9.083
HMMR	2.5001	7.2098	26.3534	2.81269e-121	2.95216e-120	265.903	upregulate	6.238	8.738
GRIN2D	2.44447	6.40006	26.3263	4.42733e-121	4.6333e-120	265.45	upregulate	5.449	7.894
GOLGA7B	3.20334	7.5789	26.3172	5.15633e-121	5.39096e-120	265.298	upregulate	6.333	9.536
RP11-161M6.2	2.96367	7.03973	26.3055	6.27763e-121	6.55372e-120	265.101	upregulate	5.887	8.851
LIMD2	2.33751	9.77782	26.283	9.13992e-121	9.51419e-120	264.726	upregulate	8.869	11.206
PTPRZ1	4.45063	8.25849	26.2288	2.26695e-120	2.34389e-119	263.819	upregulate	6.528	10.978
SPRY4	2.26425	11.4479	26.0858	2.47453e-119	2.51737e-118	261.432	upregulate	10.567	12.832
HOXC9	3.96285	5.80411	26.0761	2.91111e-119	2.95732e-118	261.27	upregulate	4.263	8.226
RP11-126K1.6	1.70595	4.42165	26.0165	7.8726e-119	7.9637e-118	260.276	upregulate	3.758	5.464
POU3F1	3.37766	5.16338	25.9492	2.42101e-118	2.42733e-117	259.154	upregulate	3.85	7.228
RP11-359E10.1	2.63481	5.6057	25.9359	3.02276e-118	3.02361e-117	258.932	upregulate	4.581	7.216
RUNX3	2.83181	9.77171	25.7869	3.61966e-117	3.57741e-116	256.453	upregulate	8.67	11.502
PHLDA1	1.85997	12.7754	25.78	4.0598e-117	4.01056e-116	256.338	upregulate	12.052	13.912
PCDHGC3	1.73711	12.576	25.7456	7.19941e-117	7.08282e-116	255.766	upregulate	11.9	13.638
RP11-139H14.5	2.56155	2.92936	25.6997	1.546e-116	1.51128e-115	255.003	upregulate	1.933	4.495
XXBAC-B461K10.4	1.79208	10.1121	25.6604	2.96967e-116	2.88594e-115	254.351	upregulate	9.415	11.207
CECR7	2.75436	7.20432	25.6149	6.33669e-116	6.13584e-115	253.594	upregulate	6.133	8.888
CBX3P9	1.59703	2.97977	25.5896	9.64168e-116	9.30673e-115	253.175	upregulate	2.359	3.956
MTFR2	2.25295	5.66919	25.5824	1.08577e-115	1.04711e-114	253.056	upregulate	4.793	7.046
RPL39L	1.83625	7.97527	25.4724	6.74698e-115	6.44319e-114	251.232	upregulate	7.261	9.097
MREG	2.12679	9.6132	25.4698	7.04669e-115	6.72343e-114	251.189	upregulate	8.786	10.913
PPP1R18	1.63144	11.728	25.457	8.71657e-115	8.30934e-114	250.976	upregulate	11.094	12.725
DPY19L2P2	2.22271	6.63516	25.4537	9.20764e-115	8.76969e-114	250.921	upregulate	5.771	7.993
CKS2	1.79237	9.23	25.4508	9.66434e-115	9.19652e-114	250.873	upregulate	8.533	10.325
RMI2	1.79404	8.07854	25.4272	1.42973e-114	1.35752e-113	250.482	upregulate	7.381	9.175
SIRPA	1.70277	12.3775	25.4238	1.51094e-114	1.43399e-113	250.427	upregulate	11.715	13.418
DUXAP10	2.98855	5.73399	25.411	1.86812e-114	1.77142e-113	250.215	upregulate	4.572	7.56
NAT14	1.78427	9.33735	25.3887	2.70705e-114	2.56354e-113	249.844	upregulate	8.643	10.428
ADAM12	3.03653	8.20876	25.3827	2.98868e-114	2.82525e-113	249.746	upregulate	7.028	10.064
AC064875.2	3.17195	4.24562	25.3003	1.16981e-113	1.10101e-112	248.383	upregulate	3.012	6.184
RNF144A	1.71709	10.6158	25.2676	2.00983e-113	1.88584e-112	247.842	upregulate	9.948	11.665
RASA3	1.59511	10.7043	25.2407	3.1409e-113	2.93305e-112	247.397	upregulate	10.084	11.679
RP11-307C19.2	3.01342	2.88263	25.1822	8.25483e-113	7.66861e-112	246.432	upregulate	1.711	4.724
ST3GAL4-AS1	1.67597	6.56041	25.1819	8.30151e-113	7.70865e-112	246.426	upregulate	5.909	7.585
CNIH2	2.38506	5.08796	25.1771	8.9906e-113	8.34492e-112	246.346	upregulate	4.16	6.545
PVT1	2.27093	7.23752	25.1584	1.22522e-112	1.13527e-111	246.037	upregulate	6.354	8.625
PHACTR1	2.61493	9.84758	25.1576	1.24053e-112	1.14847e-111	246.025	upregulate	8.831	11.446
CENPE	2.31845	7.52408	25.1445	1.54084e-112	1.42403e-111	245.808	upregulate	6.622	8.941
SYCE2	1.60774	3.81106	25.1058	2.9212e-112	2.69397e-111	245.17	upregulate	3.186	4.794
RP11-259N19.1	2.27792	6.12321	25.0722	5.08482e-112	4.67526e-111	244.616	upregulate	5.237	7.515
RP11-51F16.1	2.04111	6.31499	25.0629	5.93397e-112	5.45134e-111	244.462	upregulate	5.521	7.562
PLK4	1.71813	7.48891	25.0554	6.71172e-112	6.1632e-111	244.339	upregulate	6.821	8.539
LA16C-390E6.4	2.09627	2.71781	24.9766	2.46291e-111	2.24342e-110	243.041	upregulate	1.903	3.999
HPDL	2.84584	5.93741	24.9561	3.45567e-111	3.13842e-110	242.702	upregulate	4.831	7.677
SRPX	2.39726	10.7692	24.9315	5.18635e-111	4.70028e-110	242.297	upregulate	9.837	12.234
DAAM2	1.99935	11.4665	24.9041	8.13615e-111	7.35194e-110	241.847	upregulate	10.689	12.688
DUXAP8	2.99274	7.23125	24.8916	1.00064e-110	9.02294e-110	241.641	upregulate	6.067	9.06
DEPDC1B	2.27301	6.7372	24.8851	1.11406e-110	1.00373e-109	241.533	upregulate	5.853	8.126
E2F2	3.09328	6.86922	24.8797	1.21626e-110	1.09443e-109	241.446	upregulate	5.666	8.76
PTPRG-AS1	1.9857	5.11312	24.8605	1.66888e-110	1.49733e-109	241.13	upregulate	4.341	6.327
KLF14	3.12652	3.68514	24.8558	1.80525e-110	1.61901e-109	241.051	upregulate	2.469	5.596
KIAA1211	2.91232	7.58577	24.7481	1.06241e-109	9.41803e-109	239.282	upregulate	6.453	9.366
TMEM121	1.9011	6.81515	24.7224	1.61953e-109	1.43096e-108	238.861	upregulate	6.076	7.977
RP11-363E6.4	2.16586	3.34631	24.7223	1.62217e-109	1.43271e-108	238.859	upregulate	2.504	4.67
BRSK1	2.50116	7.09869	24.7214	1.64643e-109	1.45353e-108	238.844	upregulate	6.126	8.627
RXRG	3.83794	7.14715	24.7095	2.00129e-109	1.76321e-108	238.649	upregulate	5.655	9.493
EOMES	2.56883	6.35705	24.7008	2.30977e-109	2.03248e-108	238.506	upregulate	5.358	7.927
ANKRD34A	1.72959	6.07633	24.7005	2.32296e-109	2.04326e-108	238.5	upregulate	5.404	7.133
SNHG4	2.25994	5.34071	24.6945	2.5607e-109	2.2496e-108	238.403	upregulate	4.462	6.722
SERPINH1	1.57171	12.7818	24.6796	3.27638e-109	2.87247e-108	238.157	upregulate	12.171	13.742
ARHGAP39	1.67733	9.05735	24.6735	3.61772e-109	3.16657e-108	238.058	upregulate	8.405	10.082
RNFT2	1.8449	6.56088	24.6205	8.63982e-109	7.54703e-108	237.189	upregulate	5.843	7.688
RP1-257A7.4	1.79334	4.77578	24.6077	1.06659e-108	9.29798e-108	236.978	upregulate	4.078	5.872
CABLES1	2.14241	11.2038	24.5979	1.25275e-108	1.0912e-107	236.818	upregulate	10.371	12.513
CENPK	2.21994	6.52954	24.5802	1.6755e-108	1.45766e-107	236.527	upregulate	5.666	7.886
COL11A1	3.94774	6.07665	24.5657	2.12293e-108	1.84393e-107	236.291	upregulate	4.541	8.489
RP11-576I22.2	1.94723	3.54066	24.56	2.33254e-108	2.02436e-107	236.197	upregulate	2.783	4.731
LINC00337	2.06908	2.80568	24.5511	2.69745e-108	2.33917e-107	236.052	upregulate	2.001	4.07
TIMP2	1.66829	14.5596	24.5007	6.16547e-108	5.32508e-107	235.226	upregulate	13.911	15.579
SOX5	1.85401	8.72012	24.4889	7.47936e-108	6.44694e-107	235.033	upregulate	7.999	9.853
GPR3	2.23061	6.22332	24.468	1.05452e-107	9.06417e-107	234.69	upregulate	5.356	7.586
C4ORF48	2.33239	6.46919	24.467	1.07216e-107	9.20841e-107	234.674	upregulate	5.562	7.895
MPP4	2.295	2.45445	24.45	1.41537e-107	1.21271e-106	234.397	upregulate	1.562	3.857
KLHL38	2.92659	4.24811	24.3753	4.81051e-107	4.10535e-106	233.175	upregulate	3.11	6.037
FAM178B	3.94317	5.32386	24.3423	8.25055e-107	7.00775e-106	232.636	upregulate	3.79	7.734
NES	2.27134	12.6854	24.3335	9.52906e-107	8.08092e-106	232.492	upregulate	11.802	14.073
RAD51AP1	1.70999	7.22785	24.3129	1.335e-106	1.13034e-105	232.156	upregulate	6.563	8.273
DSCR9	1.71324	2.23979	24.3123	1.34814e-106	1.14101e-105	232.146	upregulate	1.574	3.287
GREB1	3.37853	9.09468	24.3118	1.35929e-106	1.15e-105	232.138	upregulate	7.781	11.159
GDF11	1.75304	9.5439	24.2921	1.87408e-106	1.58303e-105	231.817	upregulate	8.862	10.615
RELL2	1.63586	6.92855	24.254	3.49194e-106	2.9358e-105	231.196	upregulate	6.292	7.928
BAMBI	2.40074	10.1378	24.2264	5.4871e-106	4.6024e-105	230.744	upregulate	9.204	11.605
PDXP	2.02458	9.35197	24.2262	5.50015e-106	4.61155e-105	230.742	upregulate	8.565	10.589
CTNNAP1	2.11858	2.18265	24.1698	1.38238e-105	1.15186e-104	229.822	upregulate	1.359	3.477
DOCK10	1.79058	9.98995	24.1695	1.38822e-105	1.15628e-104	229.818	upregulate	9.294	11.084
CXORF65	2.19512	3.00477	24.1418	2.18275e-105	1.81314e-104	229.366	upregulate	2.151	4.346
GPSM1	1.77536	9.63479	24.1297	2.65726e-105	2.20305e-104	229.169	upregulate	8.944	10.72
BBC3	1.67724	8.38231	24.1235	2.93871e-105	2.43358e-104	229.069	upregulate	7.73	9.407
PLEKHA4	1.66573	11.0553	24.1195	3.13723e-105	2.59697e-104	229.003	upregulate	10.407	12.073
ARNT2	2.37995	10.9797	24.1037	4.05647e-105	3.35403e-104	228.747	upregulate	10.054	12.434
RPP25	1.6732	9.6634	24.0047	2.03676e-104	1.67122e-103	227.136	upregulate	9.013	10.686
CMTM3	1.56554	10.6898	23.9935	2.44357e-104	2.00349e-103	226.954	upregulate	10.081	11.646
CASC15	2.41441	7.65547	23.9904	2.57116e-104	2.10649e-103	226.903	upregulate	6.717	9.131
RP1-257A7.5	2.50063	6.06201	23.9793	3.07692e-104	2.51701e-103	226.724	upregulate	5.09	7.59
PLEKHO2	1.5367	11.8326	23.9748	3.3136e-104	2.70753e-103	226.65	upregulate	11.235	12.772
GLUD2	1.56561	7.57465	23.957	4.42588e-104	3.60952e-103	226.361	upregulate	6.966	8.531
FKBP11	1.78337	10.397	23.9567	4.449e-104	3.627e-103	226.356	upregulate	9.704	11.487
GPR153	2.14472	9.92746	23.9545	4.6087e-104	3.75473e-103	226.32	upregulate	9.093	11.238
C8ORF46	2.4849	6.74412	23.8898	1.31843e-103	1.06675e-102	225.271	upregulate	5.778	8.263
SLITRK2	3.07329	6.30495	23.8855	1.41436e-103	1.14308e-102	225.201	upregulate	5.11	8.183
EGFL8	2.11445	8.55046	23.8734	1.72207e-103	1.3902e-102	225.004	upregulate	7.728	9.843
FXYD5	2.06893	11.7698	23.8733	1.72507e-103	1.3921e-102	225.002	upregulate	10.965	13.034
TNFSF9	2.4861	6.26189	23.8672	1.90518e-103	1.53686e-102	224.903	upregulate	5.295	7.781
SLMO1	1.58018	6.16663	23.8467	2.65707e-103	2.13699e-102	224.571	upregulate	5.552	7.132
TPBGL	2.21509	5.0753	23.8013	5.54894e-103	4.43627e-102	223.836	upregulate	4.214	6.429
KIAA1524	1.56394	7.66178	23.7731	8.76783e-103	6.99151e-102	223.379	upregulate	7.054	8.618
FAM19A3	2.67549	3.3184	23.741	1.47768e-102	1.17136e-101	222.858	upregulate	2.278	4.953
C3ORF67	1.96154	6.46653	23.7104	2.42431e-102	1.91822e-101	222.364	upregulate	5.704	7.665
HEY1	2.05631	9.26951	23.6915	3.29418e-102	2.59981e-101	222.057	upregulate	8.47	10.526
LGALS1	2.10849	13.3861	23.6632	5.21296e-102	4.10358e-101	221.599	upregulate	12.566	14.675
S1PR2	1.60029	9.53833	23.6614	5.35963e-102	4.2175e-101	221.572	upregulate	8.916	10.516
ARHGAP11B	1.82161	6.83027	23.6547	5.97534e-102	4.69856e-101	221.463	upregulate	6.122	7.943
LBX2-AS1	2.04481	8.54273	23.6475	6.71165e-102	5.26599e-101	221.347	upregulate	7.748	9.792
KDELR3	1.64896	9.94934	23.5808	1.97661e-101	1.54129e-100	220.268	upregulate	9.308	10.957
IMPDH1	1.64112	11.0564	23.5697	2.36481e-101	1.84067e-100	220.089	upregulate	10.418	12.059
FIRRE	2.26277	3.0156	23.5456	3.49482e-101	2.71531e-100	219.699	upregulate	2.136	4.398
GYG2	3.06994	9.78716	23.5386	3.91324e-101	3.03929e-100	219.587	upregulate	8.593	11.663
LRP8	2.11039	8.72219	23.5341	4.20615e-101	3.26208e-100	219.515	upregulate	7.901	10.012
LMNB1	1.8715	9.73442	23.5328	4.29623e-101	3.33074e-100	219.493	upregulate	9.007	10.878
SYT5	3.29141	3.76366	23.5196	5.3197e-101	4.11679e-100	219.28	upregulate	2.484	5.775
CTB-129P6.7	2.73676	4.0629	23.4922	8.2722e-101	6.38327e-100	218.839	upregulate	2.999	5.735
LINC00327	2.58356	4.37957	23.4797	1.01329e-100	7.81066e-100	218.637	upregulate	3.375	5.958
SLC6A8	2.20144	11.7881	23.4661	1.26136e-100	9.70892e-100	218.418	upregulate	10.932	13.133
CBR3	2.18623	8.47386	23.4404	1.9107e-100	1.46808e-99	218.003	upregulate	7.624	9.81
KIAA1755	2.27102	8.34375	23.4293	2.28588e-100	1.75134e-99	217.824	upregulate	7.461	9.732
DFNB31	1.58498	9.25055	23.3411	9.47223e-100	7.18553e-99	216.405	upregulate	8.634	10.219
AP001046.5	2.19932	6.79151	23.2794	2.55933e-99	1.93059e-98	215.413	upregulate	5.936	8.136
RP11-124N14.3	2.04609	4.73211	23.2306	5.61146e-99	4.21369e-98	214.629	upregulate	3.936	5.983
ARMC9	1.66749	9.65323	23.2196	6.69582e-99	5.02093e-98	214.452	upregulate	9.005	10.672
KIF18A	2.02924	6.87157	23.2023	8.84965e-99	6.63138e-98	214.174	upregulate	6.082	8.112
BP-21264C1.3	2.30308	2.94679	23.1256	3.03332e-98	2.26116e-97	212.944	upregulate	2.051	4.354
SLC12A5	2.33383	4.98249	23.0795	6.35491e-98	4.72249e-97	212.206	upregulate	4.075	6.409
GPR161	2.10435	9.75744	23.0757	6.75455e-98	5.01427e-97	212.145	upregulate	8.939	11.043
RP3-395M20.7	2.10547	2.11366	23.0741	6.9271e-98	5.14059e-97	212.12	upregulate	1.295	3.4
NT5DC3	1.71954	9.95384	23.054	9.56148e-98	7.08822e-97	211.798	upregulate	9.285	11.005
TUBB2A	1.68152	11.6303	23.0104	1.92613e-97	1.42251e-96	211.099	upregulate	10.976	12.658
UPP1	1.98225	10.4101	22.9972	2.37807e-97	1.75327e-96	210.888	upregulate	9.639	11.621
ANKLE1	2.03384	4.61558	22.9066	1.01451e-96	7.4287e-96	209.44	upregulate	3.825	5.858
SLC16A1-AS1	1.58568	6.33625	22.8813	1.51999e-96	1.10923e-95	209.036	upregulate	5.72	7.305
HOXC6	3.37192	6.84778	22.8112	4.66257e-96	3.38418e-95	207.917	upregulate	5.536	8.908
ARHGEF39	1.66586	6.94192	22.8061	5.05312e-96	3.66641e-95	207.837	upregulate	6.294	7.96
IGSF3	2.25031	11.7783	22.7503	1.2312e-95	8.87636e-95	206.948	upregulate	10.903	13.153
ENO2	2.18721	10.6998	22.7441	1.36066e-95	9.78675e-95	206.848	upregulate	9.849	12.036
RP11-12A20.4	1.89892	3.69183	22.6155	1.05505e-94	7.52819e-94	204.804	upregulate	2.953	4.852
TIMP1	1.83505	13.2503	22.5594	2.57758e-94	1.83069e-93	203.912	upregulate	12.537	14.372
OTX1	3.14929	4.63937	22.5553	2.75124e-94	1.95146e-93	203.847	upregulate	3.415	6.564
PPEF1	2.3362	3.76306	22.5366	3.70383e-94	2.6228e-93	203.55	upregulate	2.855	5.191
RP11-147L13.15	1.57374	7.22702	22.5294	4.15248e-94	2.93857e-93	203.436	upregulate	6.615	8.189
CHRNA5	2.11806	5.90314	22.4643	1.16653e-93	8.22265e-93	202.405	upregulate	5.079	7.198
MXD3	1.6635	7.40417	22.4604	1.24145e-93	8.74503e-93	202.342	upregulate	6.757	8.421
GAPDHP65	1.5258	3.20909	22.4592	1.26521e-93	8.90947e-93	202.324	upregulate	2.616	4.142
ACRV1	1.638	2.00685	22.3649	5.64692e-93	3.94423e-92	200.83	upregulate	1.37	3.008
GPSM3	1.84708	10.1587	22.3476	7.42325e-93	5.16983e-92	200.557	upregulate	9.44	11.287
LINC01296	2.78886	6.55704	22.3304	9.75058e-93	6.78189e-92	200.285	upregulate	5.472	8.261
CASC5	1.89485	7.78405	22.3066	1.42236e-92	9.88348e-92	199.908	upregulate	7.047	8.942
KIAA1731NL	1.7167	2.34441	22.304	1.48099e-92	1.02875e-91	199.868	upregulate	1.677	3.394
HSPA6	2.35047	8.28074	22.288	1.90962e-92	1.32308e-91	199.614	upregulate	7.367	9.717
SYNGR1	1.62245	10.845	22.2627	2.84581e-92	1.96791e-91	199.216	upregulate	10.214	11.836
FKBP9P1	1.83363	6.40226	22.2494	3.51236e-92	2.4265e-91	199.006	upregulate	5.689	7.523
FBXO41	1.82612	8.24777	22.2477	3.61036e-92	2.49339e-91	198.978	upregulate	7.538	9.364
RP11-417E7.1	2.01014	2.32116	22.2456	3.73099e-92	2.57423e-91	198.945	upregulate	1.539	3.55
RPS10-NUDT3	1.67716	7.79652	22.2263	5.063e-92	3.48655e-91	198.641	upregulate	7.144	8.821
PCAT6	1.56918	6.27311	22.21	6.54899e-92	4.49833e-91	198.384	upregulate	5.663	7.232
SMC1B	2.28833	3.02986	22.1932	8.54562e-92	5.8604e-91	198.118	upregulate	2.14	4.428
RP11-680A11.5	1.55876	3.80373	22.186	9.56874e-92	6.55367e-91	198.005	upregulate	3.198	4.756
ANKRD13B	1.65414	7.94376	22.1621	1.39554e-91	9.52475e-91	197.629	upregulate	7.3	8.955
DIAPH3	2.30501	7.5084	22.1453	1.82004e-91	1.23984e-90	197.364	upregulate	6.612	8.917
MPZ	2.99956	7.89813	22.101	3.66004e-91	2.48149e-90	196.666	upregulate	6.732	9.731
GJC1	2.08772	9.02501	22.0602	6.95623e-91	4.68234e-90	196.025	upregulate	8.213	10.301
FLJ16779	3.10152	4.06604	22.0241	1.22844e-90	8.24045e-90	195.457	upregulate	2.86	5.961
U52111.14	1.53533	1.91444	22.0032	1.70841e-90	1.14458e-89	195.128	upregulate	1.317	2.853
ZFPM2-AS1	2.83972	3.64151	22.0023	1.73277e-90	1.16018e-89	195.114	upregulate	2.537	5.377
MIR4435-1HG	1.52392	9.17874	21.9997	1.80379e-90	1.2066e-89	195.074	upregulate	8.586	10.11
MSC	2.26156	8.39419	21.9957	1.92163e-90	1.28423e-89	195.011	upregulate	7.515	9.776
LINC00282	2.17663	2.77895	21.9903	2.09183e-90	1.39624e-89	194.926	upregulate	1.932	4.109
FAM167B	2.30408	8.78378	21.9642	3.15388e-90	2.10057e-89	194.516	upregulate	7.888	10.192
SGCD	2.21373	10.0545	21.9638	3.17331e-90	2.1122e-89	194.51	upregulate	9.194	11.407
KIF26B	2.20972	8.86086	21.9068	7.77634e-90	5.1553e-89	193.615	upregulate	8.002	10.211
RELT	1.74784	8.27051	21.9013	8.4743e-90	5.61455e-89	193.53	upregulate	7.591	9.339
CPA2	3.18161	3.66744	21.8878	1.0477e-89	6.92009e-89	193.318	upregulate	2.43	5.612
MBP	1.71125	12.196	21.8832	1.12567e-89	7.42828e-89	193.246	upregulate	11.531	13.242
MMP11	2.22728	8.26664	21.8129	3.39492e-89	2.22527e-88	192.144	upregulate	7.4	9.628
AC006538.1	1.60653	4.48589	21.7756	6.08802e-89	3.97357e-88	191.561	upregulate	3.861	5.468
COLGALT2	2.3148	8.18973	21.7719	6.4561e-89	4.20997e-88	191.503	upregulate	7.29	9.604
SMOX	1.52572	9.22352	21.768	6.85448e-89	4.4684e-88	191.443	upregulate	8.63	10.156
CCNE2	1.82445	6.17456	21.7653	7.15046e-89	4.65852e-88	191.401	upregulate	5.465	7.289
C19ORF83	1.91178	3.90046	21.7635	7.3572e-89	4.79176e-88	191.372	upregulate	3.157	5.069
RAC3	1.62467	8.3594	21.7212	1.42712e-88	9.25559e-88	190.711	upregulate	7.728	9.352
SORCS1	3.20838	7.372	21.7196	1.46351e-88	9.48875e-88	190.686	upregulate	6.124	9.333
PLTP	1.67849	12.4389	21.709	1.72757e-88	1.11907e-87	190.52	upregulate	11.786	13.465
SYN3	1.92519	5.1526	21.7082	1.7489e-88	1.13255e-87	190.508	upregulate	4.404	6.329
CD44	2.10464	13.9798	21.6953	2.1418e-88	1.38489e-87	190.306	upregulate	13.161	15.266
LHFPL2	1.76386	11.2783	21.6786	2.78101e-88	1.79551e-87	190.045	upregulate	10.592	12.356
HOXC8	3.2734	5.01148	21.6457	4.64809e-88	2.99108e-87	189.532	upregulate	3.738	7.012
CHST10	1.52459	9.29741	21.6353	5.47138e-88	3.51561e-87	189.37	upregulate	8.705	10.229
MMP9	3.15238	9.03923	21.5644	1.6547e-87	1.05753e-86	188.265	upregulate	7.813	10.966
RP11-444E17.6	1.96902	2.98234	21.5627	1.69976e-87	1.08601e-86	188.238	upregulate	2.217	4.186
HERC2P8	2.35925	3.3929	21.5487	2.11266e-87	1.34861e-86	188.021	upregulate	2.475	4.835
RP11-615I2.2	2.94376	4.84845	21.5442	2.26798e-87	1.44648e-86	187.95	upregulate	3.704	6.647
APOE	2.92243	13.8513	21.5245	3.08435e-87	1.96365e-86	187.644	upregulate	12.715	15.637
KB-1742H10.3	1.63685	3.51764	21.5197	3.3225e-87	2.11401e-86	187.569	upregulate	2.881	4.518
CPEB1	2.35819	7.63726	21.5095	3.89165e-87	2.47468e-86	187.412	upregulate	6.72	9.078
SLC1A4	1.87018	10.8523	21.4813	6.04437e-87	3.83452e-86	186.972	upregulate	10.125	11.995
SLC43A3	1.74471	11.78	21.3784	2.996e-86	1.88068e-85	185.374	upregulate	11.102	12.846
RPS2P55	1.60768	6.85171	21.3765	3.08557e-86	1.93634e-85	185.345	upregulate	6.227	7.834
RP11-1055B8.1	1.86098	3.94551	21.3699	3.41867e-86	2.14162e-85	185.243	upregulate	3.222	5.083
GPR37	2.75553	7.20486	21.3603	3.9702e-86	2.48279e-85	185.093	upregulate	6.133	8.889
AC147651.4	2.07422	4.71144	21.3188	7.55718e-86	4.70949e-85	184.451	upregulate	3.905	5.979
DDIAS	1.82481	6.89514	21.2955	1.08575e-85	6.74862e-85	184.089	upregulate	6.185	8.01
PODXL2	1.8529	9.7109	21.2738	1.5191e-85	9.42576e-85	183.754	upregulate	8.99	10.843
RP11-862L9.3	2.57698	2.86314	21.2423	2.47775e-85	1.5343e-84	183.266	upregulate	1.861	4.438
CPEB1-AS1	1.87376	2.31867	21.2416	2.50135e-85	1.54848e-84	183.256	upregulate	1.59	3.464
ITPKB	1.71626	12.1088	21.2396	2.58349e-85	1.5984e-84	183.224	upregulate	11.441	13.158
HSF4	1.73956	8.38584	21.2374	2.67089e-85	1.65153e-84	183.191	upregulate	7.709	9.449
ST6GALNAC2	2.0861	10.5074	21.1973	4.96998e-85	3.06347e-84	182.571	upregulate	9.696	11.782
GPR158	2.75969	5.48941	21.1725	7.29744e-85	4.47885e-84	182.188	upregulate	4.416	7.176
BMP8B	2.26396	8.51655	21.1578	9.15894e-85	5.61494e-84	181.961	upregulate	7.636	9.9
SYT14	3.43543	4.6538	21.1549	9.57922e-85	5.87092e-84	181.916	upregulate	3.318	6.753
PPFIA4	2.19826	6.38097	21.1111	1.88512e-84	1.15109e-83	181.241	upregulate	5.526	7.724
PAG1	1.79054	10.3874	21.0799	3.0558e-84	1.85592e-83	180.758	upregulate	9.691	11.482
TKTL1	2.63837	4.12398	21.0594	4.18785e-84	2.53844e-83	180.444	upregulate	3.098	5.736
C2ORF48	1.7994	2.19599	21.0136	8.49491e-84	5.11598e-83	179.738	upregulate	1.496	3.296
LDHAP2	1.85887	2.66759	20.9579	2.00297e-83	1.20189e-82	178.882	upregulate	1.945	3.804
SPTA1	2.45184	3.25034	20.9184	3.68286e-83	2.20194e-82	178.274	upregulate	2.297	4.749
CCDC78	2.54314	5.80774	20.9052	4.50966e-83	2.69028e-82	178.072	upregulate	4.819	7.362
RP11-521C20.2	1.72564	2.28497	20.8613	8.86624e-83	5.27024e-82	177.397	upregulate	1.614	3.34
HERC2P5	2.39428	3.54272	20.8541	9.90238e-83	5.87802e-82	177.287	upregulate	2.612	5.006
HRNR	2.25918	5.70294	20.7495	4.92814e-82	2.89655e-81	175.686	upregulate	4.824	7.084
HOXC4	2.42987	6.82019	20.6912	1.20441e-81	7.04435e-81	174.794	upregulate	5.875	8.305
AC009065.4	2.43945	4.76613	20.6651	1.79513e-81	1.04623e-80	174.396	upregulate	3.817	6.257
RP11-834C11.14	2.62614	4.30313	20.6475	2.35127e-81	1.36851e-80	174.126	upregulate	3.282	5.908
NRIP3	2.11441	7.31227	20.6397	2.64789e-81	1.53907e-80	174.008	upregulate	6.49	8.604
BRCA2	1.6455	7.36741	20.6179	3.6942e-81	2.14202e-80	173.675	upregulate	6.727	8.373
CHSY3	1.83659	7.06675	20.5745	7.16548e-81	4.13028e-80	173.014	upregulate	6.353	8.189
MICAL1	1.73639	10.9164	20.5603	8.91079e-81	5.13355e-80	172.797	upregulate	10.241	11.977
RDM1	1.90536	3.10473	20.5586	9.13936e-81	5.26382e-80	172.771	upregulate	2.364	4.269
ECM1	2.27957	11.2192	20.5231	1.57072e-80	9.02e-80	172.231	upregulate	10.333	12.612
CTD-2561B21.11	1.56587	3.06399	20.5174	1.71273e-80	9.82765e-80	172.145	upregulate	2.455	4.021
LINC00473	3.48453	6.02964	20.4783	3.11127e-80	1.78049e-79	171.549	upregulate	4.675	8.159
COL22A1	3.24157	6.72759	20.4473	4.98553e-80	2.84551e-79	171.078	upregulate	5.467	8.709
CKS1BP3	1.71607	3.0648	20.43	6.49072e-80	3.69871e-79	170.815	upregulate	2.397	4.114
AC137932.6	1.87103	2.32929	20.4014	1.00278e-79	5.68267e-79	170.381	upregulate	1.602	3.473
APOD	3.35639	12.3767	20.392	1.15658e-79	6.54733e-79	170.239	upregulate	11.071	14.428
SCARF2	1.62428	9.34409	20.3559	2.00269e-79	1.12926e-78	169.691	upregulate	8.712	10.337
MSTO2P	1.54153	5.70602	20.3429	2.44036e-79	1.37388e-78	169.494	upregulate	5.107	6.648
PABPC1L	1.70258	8.7324	20.3375	2.64765e-79	1.48981e-78	169.412	upregulate	8.07	9.773
CTNNA2	3.06927	4.48455	20.335	2.7495e-79	1.54671e-78	169.375	upregulate	3.291	6.36
ADAM11	2.2291	5.43708	20.2583	8.80199e-79	4.90403e-78	168.213	upregulate	4.57	6.799
RP5-858L17.1	1.65975	4.29549	20.2359	1.23663e-78	6.87029e-78	167.874	upregulate	3.65	5.31
NAT8L	3.30825	8.85821	20.2191	1.59484e-78	8.85353e-78	167.62	upregulate	7.572	10.88
LRGUK	1.96675	4.93906	20.1895	2.4931e-78	1.37726e-77	167.175	upregulate	4.174	6.141
SCARB1	1.85063	11.6856	20.1865	2.60908e-78	1.44096e-77	167.129	upregulate	10.966	12.817
CLEC11A	1.69725	9.03473	20.1179	7.36637e-78	4.04652e-77	166.094	upregulate	8.375	10.072
COL9A3	2.60405	7.98739	20.1125	7.99496e-78	4.38846e-77	166.012	upregulate	6.975	9.579
RP11-557H15.4	1.89151	4.0016	20.0701	1.51495e-77	8.28387e-77	165.374	upregulate	3.266	5.158
OLIG1	3.51657	4.55269	20.0669	1.5912e-77	8.6964e-77	165.325	upregulate	3.185	6.702
MATN1	1.5894	2.77313	20.065	1.63687e-77	8.9369e-77	165.297	upregulate	2.155	3.744
AC006946.16	2.18916	4.61107	20.0554	1.89076e-77	1.03126e-76	165.153	upregulate	3.76	5.949
ASB9	1.64841	7.96936	20.0334	2.63653e-77	1.43257e-76	164.821	upregulate	7.328	8.977
SLC7A1	1.60072	11.6515	20.0312	2.72422e-77	1.47985e-76	164.789	upregulate	11.029	12.63
GNG2	1.6649	10.5676	19.9816	5.74827e-77	3.10531e-76	164.043	upregulate	9.92	11.585
HAPLN3	2.02043	8.69044	19.9645	7.44258e-77	4.01455e-76	163.786	upregulate	7.905	9.925
FAM111B	2.1811	6.95131	19.96	7.96121e-77	4.29322e-76	163.719	upregulate	6.103	8.284
TYRP1	5.22945	6.91989	19.9535	8.77969e-77	4.73342e-76	163.621	upregulate	4.886	10.116
LA16C-349E10.1	2.12357	3.05196	19.9157	1.54892e-76	8.31735e-76	163.054	upregulate	2.226	4.35
TWIST1	2.6455	6.9941	19.8808	2.61825e-76	1.40419e-75	162.531	upregulate	5.965	8.611
TFAP2E	1.81272	5.32238	19.8618	3.48054e-76	1.86247e-75	162.247	upregulate	4.617	6.43
RP1-34H18.1	1.78848	2.50053	19.8443	4.52355e-76	2.41578e-75	161.985	upregulate	1.805	3.593
FAM225A	2.20435	6.85257	19.8297	5.63198e-76	3.00251e-75	161.766	upregulate	5.995	8.2
L1CAM	3.16055	9.77883	19.8256	5.98979e-76	3.1909e-75	161.705	upregulate	8.55	11.71
NKAIN1	2.80031	4.55281	19.7806	1.17591e-75	6.23961e-75	161.032	upregulate	3.464	6.264
RP11-49I11.4	1.6235	3.47111	19.7326	2.41158e-75	1.27366e-74	160.315	upregulate	2.84	4.463
SNX32	1.58632	5.59891	19.6983	4.02873e-75	2.11838e-74	159.803	upregulate	4.982	6.568
HOXC10	4.00125	6.12552	19.6641	6.71422e-75	3.51671e-74	159.294	upregulate	4.569	8.571
C16ORF47	1.63048	2.15975	19.6483	8.50694e-75	4.44702e-74	159.058	upregulate	1.526	3.156
APC2	2.14074	4.64202	19.6098	1.50931e-74	7.84795e-74	158.486	upregulate	3.81	5.95
FAM78A	1.72226	8.68992	19.5819	2.28894e-74	1.18502e-73	158.07	upregulate	8.02	9.742
CELSR3	1.66153	7.03265	19.521	5.66922e-74	2.91053e-73	157.165	upregulate	6.387	8.048
ASPHD1	2.17053	6.56885	19.4444	1.7699e-73	9.02192e-73	156.029	upregulate	5.725	7.895
FOXD2	1.94575	6.40936	19.4124	2.84521e-73	1.44553e-72	155.556	upregulate	5.653	7.598
TYMSOS	1.71514	4.79317	19.398	3.52351e-73	1.7855e-72	155.342	upregulate	4.126	5.841
E2F8	2.4332	5.80944	19.3972	3.5633e-73	1.80524e-72	155.331	upregulate	4.863	7.296
IGF2BP2	1.69696	9.58018	19.36	6.18524e-73	3.11522e-72	154.781	upregulate	8.92	10.617
SLAMF9	2.60925	3.24655	19.3439	7.8436e-73	3.94399e-72	154.544	upregulate	2.232	4.841
C1ORF233	1.96027	8.61415	19.3325	9.29759e-73	4.66964e-72	154.374	upregulate	7.852	9.812
STAG3	1.57389	7.40732	19.3056	1.38408e-72	6.93361e-72	153.978	upregulate	6.795	8.369
LINC01117	1.73039	2.49956	19.2518	3.06529e-72	1.52774e-71	153.184	upregulate	1.827	3.557
TRIM46	1.79987	5.70221	19.2286	4.31495e-72	2.1456e-71	152.843	upregulate	5.002	6.802
CTD-2325P2.4	1.83163	3.1821	19.2204	4.86866e-72	2.41647e-71	152.723	upregulate	2.47	4.301
CIT	1.71064	9.79449	19.197	6.88358e-72	3.40788e-71	152.377	upregulate	9.129	10.84
DPYSL4	2.50864	6.26914	19.1807	8.75294e-72	4.3234e-71	152.138	upregulate	5.294	7.802
C1QL4	2.57551	3.48824	19.1589	1.20557e-71	5.93566e-71	151.818	upregulate	2.487	5.062
MEX3A	1.75237	7.87881	19.0847	3.59368e-71	1.75929e-70	150.729	upregulate	7.197	8.95
MYEF2	1.83849	9.82376	19.0795	3.88056e-71	1.8993e-70	150.652	upregulate	9.109	10.947
APOBEC3B	1.93545	7.65122	19.0077	1.11287e-70	5.3989e-70	149.601	upregulate	6.899	8.834
NLGN1	2.45792	7.42228	18.9767	1.75553e-70	8.49178e-70	149.146	upregulate	6.466	8.924
ALS2CR11	1.94154	4.57087	18.9499	2.59819e-70	1.25116e-69	148.755	upregulate	3.816	5.757
ELFN1-AS1	2.538	2.73883	18.9413	2.94704e-70	1.41851e-69	148.63	upregulate	1.752	4.29
GPR56	1.81833	13.2572	18.9158	4.28094e-70	2.05367e-69	148.257	upregulate	12.55	14.368
RP11-589N15.2	1.55346	2.45277	18.9038	5.10501e-70	2.44517e-69	148.082	upregulate	1.849	3.402
HSD3BP5	1.78237	2.96614	18.8822	6.99241e-70	3.34472e-69	147.768	upregulate	2.273	4.055
AC090945.1	1.54564	2.76014	18.863	9.26243e-70	4.42072e-69	147.487	upregulate	2.159	3.705
SNX10	1.84882	10.2429	18.8492	1.13391e-69	5.40465e-69	147.286	upregulate	9.524	11.373
AC016757.3	1.83058	4.88273	18.8464	1.18081e-69	5.62573e-69	147.245	upregulate	4.171	6.001
LA16C-390E6.5	3.05296	7.16031	18.8417	1.26347e-69	6.01552e-69	147.178	upregulate	5.973	9.026
FAM222A	1.52531	8.34576	18.8086	2.05027e-69	9.7207e-69	146.695	upregulate	7.753	9.278
C8ORF48	1.63545	5.77017	18.8067	2.10777e-69	9.98671e-69	146.667	upregulate	5.134	6.77
CDKN2A	2.75476	6.51328	18.7785	3.18004e-69	1.50077e-68	146.257	upregulate	5.442	8.197
AIM2	2.54686	5.55991	18.7396	5.59886e-69	2.63362e-68	145.693	upregulate	4.569	7.116
GAREML	1.52542	8.0364	18.7342	6.05597e-69	2.84615e-68	145.614	upregulate	7.443	8.969
ERBB3	1.85097	12.989	18.7276	6.66608e-69	3.13015e-68	145.519	upregulate	12.269	14.12
IL4I1	2.03636	7.47179	18.6796	1.34051e-68	6.26582e-68	144.822	upregulate	6.68	8.716
MAST1	1.97374	4.91447	18.6192	3.22273e-68	1.5005e-67	143.947	upregulate	4.147	6.121
LY6E	1.57881	13.2212	18.5906	4.87967e-68	2.26608e-67	143.533	upregulate	12.607	14.186
NFIA-AS2	1.97784	2.90557	18.4784	2.47456e-67	1.13738e-66	141.914	upregulate	2.136	4.114
TRPM2	1.65522	8.19118	18.4632	3.08156e-67	1.41365e-66	141.695	upregulate	7.547	9.203
ELOVL2	3.05372	7.29688	18.4583	3.30754e-67	1.51603e-66	141.624	upregulate	6.109	9.163
RP11-666A8.9	2.18589	3.64211	18.408	6.83186e-67	3.11548e-66	140.901	upregulate	2.792	4.978
NKAIN4	2.84421	4.53396	18.3923	8.56449e-67	3.89733e-66	140.675	upregulate	3.428	6.272
BP-21264C1.1	2.10438	3.94861	18.3024	3.12574e-66	1.40898e-65	139.384	upregulate	3.13	5.235
CTSK	2.15685	11.4216	18.3016	3.15995e-66	1.4241e-65	139.373	upregulate	10.583	12.74
NXPH4	2.37775	5.59399	18.2909	3.68483e-66	1.65856e-65	139.22	upregulate	4.669	7.047
CTC-251I16.1	1.83362	6.75986	18.2204	1.01353e-65	4.54105e-65	138.211	upregulate	6.047	7.88
GDPD5	1.56673	9.40833	18.1468	2.90603e-65	1.29367e-64	137.16	upregulate	8.799	10.366
B3GALT1	2.64418	5.41251	18.0953	6.07074e-65	2.68913e-64	136.426	upregulate	4.384	7.028
LINC00944	1.8953	2.43943	18.0501	1.15611e-64	5.09389e-64	135.783	upregulate	1.702	3.598
HIST3H2BB	1.6448	3.77728	18.0453	1.23866e-64	5.45428e-64	135.715	upregulate	3.138	4.782
SCG2	2.65492	6.5586	18.0424	1.28992e-64	5.67533e-64	135.674	upregulate	5.526	8.181
LAMA1	2.39269	8.78446	18.0278	1.58966e-64	6.98413e-64	135.466	upregulate	7.854	10.247
SALL4	2.13666	5.22358	18.0203	1.76888e-64	7.76518e-64	135.359	upregulate	4.393	6.529
RP11-426C22.4	1.68233	3.14843	18.0127	1.97028e-64	8.64753e-64	135.252	upregulate	2.494	4.177
NBEAP3	1.84293	2.58526	18.0122	1.98343e-64	8.70344e-64	135.245	upregulate	1.869	3.711
ADAMTS14	2.05618	5.66797	18.0055	2.18344e-64	9.57527e-64	135.149	upregulate	4.868	6.925
HOXD-AS2	2.32191	4.72898	17.9295	6.43138e-64	2.79986e-63	134.072	upregulate	3.826	6.148
IL1RAP	1.62556	9.92198	17.8995	9.85553e-64	4.28101e-63	133.646	upregulate	9.29	10.915
CHRNA1	2.82387	4.08497	17.881	1.27978e-63	5.55009e-63	133.386	upregulate	2.987	5.811
PKNOX2	2.03254	8.89336	17.8795	1.30786e-63	5.6696e-63	133.364	upregulate	8.103	10.135
MCAM	1.72999	12.9065	17.835	2.4577e-63	1.06092e-62	132.735	upregulate	12.234	13.964
RP4-555D20.1	2.40294	3.86944	17.7761	5.65386e-63	2.42602e-62	131.904	upregulate	2.935	5.338
CADPS	2.60677	5.83104	17.7572	7.38456e-63	3.16359e-62	131.638	upregulate	4.817	7.424
PHLDA3	1.54405	11.202	17.7522	7.92643e-63	3.39438e-62	131.567	upregulate	10.602	12.146
RP11-629N8.5	2.10945	4.8488	17.7472	8.50817e-63	3.64278e-62	131.497	upregulate	4.028	6.138
LRRC39	1.68991	5.10025	17.5854	8.30258e-62	3.50659e-61	129.225	upregulate	4.443	6.133
MMP16	2.55795	7.3699	17.5423	1.52068e-61	6.39494e-61	128.622	upregulate	6.375	8.933
NKX3-2	2.24657	3.44548	17.5381	1.61188e-61	6.77451e-61	128.564	upregulate	2.572	4.818
FSCN1	1.56598	11.6007	17.5143	2.25007e-61	9.43641e-61	128.231	upregulate	10.992	12.558
RP4-555D20.2	2.64911	5.88883	17.5074	2.48044e-61	1.03843e-60	128.134	upregulate	4.859	7.508
SPHK1	1.67946	8.90124	17.4706	4.15063e-61	1.73361e-60	127.621	upregulate	8.248	9.928
ETV1	1.64759	10.1798	17.3966	1.16768e-60	4.8423e-60	126.589	upregulate	9.539	11.187
CTLA4	2.16401	5.50652	17.3704	1.68208e-60	6.96471e-60	126.225	upregulate	4.665	6.829
RP11-38M8.1	1.5363	3.66669	17.3544	2.1015e-60	8.69299e-60	126.003	upregulate	3.069	4.606
HSPA7	2.0393	7.22888	17.3372	2.67154e-60	1.10319e-59	125.764	upregulate	6.436	8.475
TP53TG3D	2.39331	4.37655	17.3248	3.17446e-60	1.30886e-59	125.592	upregulate	3.446	5.839
ANKRD7	1.64359	3.31044	17.3017	4.37923e-60	1.8011e-59	125.271	upregulate	2.671	4.315
COL5A3	1.6981	9.59074	17.3001	4.47855e-60	1.8416e-59	125.249	upregulate	8.93	10.628
RP5-907C10.3	2.03268	3.23242	17.2624	7.55731e-60	3.09694e-59	124.727	upregulate	2.442	4.475
FOXD1-AS1	1.89064	2.79884	17.2499	8.99906e-60	3.68145e-59	124.553	upregulate	2.064	3.954
RP11-4B16.4	1.70088	4.46379	17.2471	9.35475e-60	3.8255e-59	124.515	upregulate	3.802	5.503
AP000349.2	2.28624	3.57536	17.2443	9.71694e-60	3.9721e-59	124.477	upregulate	2.686	4.973
ST3GAL5-AS1	1.57898	3.11095	17.2314	1.16202e-59	4.74199e-59	124.298	upregulate	2.497	4.076
GABRD	1.63493	4.57604	17.2202	1.35794e-59	5.53628e-59	124.143	upregulate	3.94	5.575
RP11-650L12.2	1.68855	4.43581	17.1906	2.048e-59	8.31809e-59	123.733	upregulate	3.779	5.468
ATP10A	1.83302	9.44323	17.18	2.3713e-59	9.62394e-59	123.587	upregulate	8.73	10.563
RP5-1028K7.2	1.8348	3.4216	17.1736	2.59042e-59	1.05033e-58	123.499	upregulate	2.708	4.543
LINC01116	2.16927	7.07606	17.1708	2.69337e-59	1.09187e-58	123.46	upregulate	6.232	8.402
CDIPT-AS1	1.59913	2.50612	17.115	5.8313e-59	2.35419e-58	122.69	upregulate	1.884	3.483
RP11-404F10.2	2.15083	2.95784	17.0464	1.50149e-58	6.01885e-58	121.747	upregulate	2.121	4.272
LA16C-60H5.7	1.75224	3.33174	17.0426	1.58321e-58	6.34406e-58	121.695	upregulate	2.65	4.403
NBAT1	1.61042	2.74985	17.0386	1.67261e-58	6.70103e-58	121.64	upregulate	2.124	3.734
FOXD1	2.27568	4.96798	17.0195	2.17588e-58	8.69623e-58	121.378	upregulate	4.083	6.359
CAMK2N2	1.74924	3.62848	17.0078	2.55763e-58	1.0203e-57	121.216	upregulate	2.948	4.697
VPS9D1-AS1	1.82449	6.21546	16.9761	3.9548e-58	1.573e-57	120.782	upregulate	5.506	7.33
HRH2	1.8842	5.95524	16.9717	4.19981e-58	1.6686e-57	120.722	upregulate	5.222	7.107
TNFRSF19	1.78864	10.3164	16.9522	5.49454e-58	2.17897e-57	120.454	upregulate	9.621	11.409
ACP5	1.89482	11.61	16.9392	6.56324e-58	2.59943e-57	120.277	upregulate	10.873	12.768
SH3BP1	1.61074	9.99504	16.8965	1.18006e-57	4.65829e-57	119.692	upregulate	9.369	10.979
EWSAT1	2.51394	4.59531	16.8792	1.4947e-57	5.89167e-57	119.457	upregulate	3.618	6.132
RP11-66B24.7	2.1248	4.57236	16.8575	2.0127e-57	7.91898e-57	119.16	upregulate	3.746	5.871
BAIAP2L2	2.33672	7.38393	16.8566	2.03863e-57	8.01953e-57	119.147	upregulate	6.475	8.812
PLA1A	2.33032	9.08443	16.8152	3.59323e-57	1.41015e-56	118.582	upregulate	8.178	10.509
SH2D5	1.96842	3.89122	16.8135	3.67831e-57	1.44301e-56	118.559	upregulate	3.126	5.094
AC156455.1	1.66147	4.65395	16.7723	6.45463e-57	2.52204e-56	117.998	upregulate	4.008	5.669
HOXA1	1.59992	5.85491	16.7625	7.37829e-57	2.88086e-56	117.865	upregulate	5.233	6.833
LRRN4CL	2.53913	8.10749	16.7455	9.30057e-57	3.62614e-56	117.634	upregulate	7.12	9.659
GDF15	2.65862	10.7356	16.7307	1.13754e-56	4.42627e-56	117.433	upregulate	9.702	12.36
FXYD7	1.81819	3.58036	16.7287	1.17008e-56	4.55122e-56	117.405	upregulate	2.873	4.691
LSAMP	2.18352	9.33107	16.7095	1.51953e-56	5.89979e-56	117.145	upregulate	8.482	10.665
KIF6	1.59429	6.54633	16.7087	1.5355e-56	5.95967e-56	117.134	upregulate	5.926	7.521
PCDH7	1.86823	10.2988	16.6858	2.09757e-56	8.12359e-56	116.824	upregulate	9.572	11.44
KCNN4	2.57773	8.91606	16.6854	2.10924e-56	8.16732e-56	116.818	upregulate	7.914	10.491
GLI3	1.56954	10.0305	16.6777	2.34348e-56	9.06616e-56	116.713	upregulate	9.42	10.99
LINC01272	2.30578	7.25219	16.6502	3.40597e-56	1.31435e-55	116.34	upregulate	6.356	8.661
ST8SIA1	1.91815	8.10181	16.6423	3.79279e-56	1.46179e-55	116.233	upregulate	7.356	9.274
CCDC154	1.61935	4.2435	16.5956	7.13965e-56	2.73602e-55	115.603	upregulate	3.614	5.233
GDNF-AS1	2.12162	3.24346	16.5752	9.4236e-56	3.60356e-55	115.326	upregulate	2.418	4.54
ADAM23	1.93799	7.72612	16.4828	3.29011e-55	1.25013e-54	114.08	upregulate	6.972	8.91
SH2D2A	1.59443	6.91257	16.4672	4.05802e-55	1.53946e-54	113.871	upregulate	6.293	7.887
CORO2B	1.90067	9.3599	16.3838	1.24779e-54	4.70213e-54	112.751	upregulate	8.621	10.521
DLX6	2.17546	2.99468	16.2875	4.54748e-54	1.69906e-53	111.462	upregulate	2.149	4.324
CSPG5	1.86455	5.86407	16.2668	6.00383e-54	2.23892e-53	111.186	upregulate	5.139	7.004
HTATSF1P2	1.76077	3.77376	16.2552	7.01347e-54	2.61316e-53	111.031	upregulate	3.089	4.85
APBA2	1.7969	7.74492	16.246	7.92761e-54	2.95019e-53	110.909	upregulate	7.046	8.843
PGF	1.63661	9.05963	16.2293	9.92423e-54	3.68555e-53	110.685	upregulate	8.423	10.06
PLEKHH1	1.72485	10.1956	16.2214	1.10241e-53	4.09048e-53	110.58	upregulate	9.525	11.25
NAV3	1.58604	7.90301	16.2086	1.30739e-53	4.84272e-53	110.41	upregulate	7.286	8.872
LINC00896	1.74151	2.80899	16.1908	1.6595e-53	6.13639e-53	110.172	upregulate	2.132	3.873
FLJ35934	1.52828	3.45804	16.1645	2.35533e-53	8.68995e-53	109.823	upregulate	2.864	4.392
GPR84	1.69121	4.67145	16.1521	2.77985e-53	1.02299e-52	109.658	upregulate	4.014	5.705
ZNF695	1.66603	3.56577	16.0669	8.63779e-53	3.15711e-52	108.528	upregulate	2.918	4.584
FBLL1	2.06896	4.49267	16.0656	8.79604e-53	3.2144e-52	108.51	upregulate	3.688	5.757
FCGR2A	1.55338	10.5961	16.0614	9.29296e-53	3.39369e-52	108.456	upregulate	9.992	11.545
RP11-75I2.3	1.97374	3.5711	16.023	1.54732e-52	5.62866e-52	107.948	upregulate	2.804	4.777
CEMIP	2.19707	7.9631	16.0053	1.95712e-52	7.10616e-52	107.713	upregulate	7.109	9.306
TBX2	1.62476	10.5347	15.9175	6.2562e-52	2.25295e-51	106.555	upregulate	9.903	11.528
CARD14	1.77872	6.61634	15.8777	1.05714e-51	3.79041e-51	106.033	upregulate	5.925	7.703
SAPCD2	1.68649	7.92346	15.8498	1.52682e-51	5.45899e-51	105.666	upregulate	7.268	8.954
BRSK2	2.00841	5.06054	15.785	3.57983e-51	1.27253e-50	104.817	upregulate	4.279	6.288
CGREF1	1.79754	7.55222	15.7843	3.61317e-51	1.28395e-50	104.808	upregulate	6.853	8.651
COL1A1	1.90243	14.3445	15.7813	3.76038e-51	1.33604e-50	104.768	upregulate	13.605	15.507
RP11-320N21.1	1.54212	2.30851	15.7366	6.75671e-51	2.39154e-50	104.184	upregulate	1.709	3.251
SPP1	2.68625	11.7293	15.7079	9.85139e-51	3.47888e-50	103.809	upregulate	10.685	13.371
MINOS1-NBL1	1.71309	6.82555	15.6858	1.31585e-50	4.63533e-50	103.52	upregulate	6.159	7.872
NANOS1	1.75819	7.46129	15.6363	2.51165e-50	8.80881e-50	102.876	upregulate	6.778	8.536
RPLP0P2	1.80521	5.22933	15.5869	4.78022e-50	1.66645e-49	102.235	upregulate	4.527	6.333
ACSBG1	2.0182	5.26802	15.5781	5.36224e-50	1.86844e-49	102.121	upregulate	4.483	6.501
CD70	1.86198	4.12938	15.5743	5.63318e-50	1.96158e-49	102.072	upregulate	3.405	5.267
CDCA7	1.99892	7.735	15.5694	6.01099e-50	2.09077e-49	102.007	upregulate	6.958	8.957
GMPR	1.82454	10.0516	15.5559	7.16267e-50	2.48693e-49	101.832	upregulate	9.342	11.167
GJB1	2.88417	9.695	15.4813	1.88673e-49	6.51301e-49	100.867	upregulate	8.573	11.458
TNNT1	2.94597	5.12609	15.4722	2.12455e-49	7.32689e-49	100.749	upregulate	3.98	6.926
TRIM67	1.64253	3.32426	15.471	2.15746e-49	7.43801e-49	100.734	upregulate	2.686	4.328
HAS2	1.78322	8.10093	15.4659	2.30409e-49	7.93718e-49	100.668	upregulate	7.407	9.191
TRPM2-AS	2.15729	3.30763	15.4565	2.60218e-49	8.9583e-49	100.547	upregulate	2.469	4.626
MCOLN2	1.65894	6.89491	15.3605	9.01147e-49	3.07767e-48	99.3097	upregulate	6.25	7.909
KCNJ13	2.77944	5.18481	15.3094	1.74016e-48	5.90842e-48	98.6542	upregulate	4.104	6.883
GPR85	1.60697	6.26726	15.277	2.64146e-48	8.939e-48	98.2385	upregulate	5.642	7.249
B4GALNT4	2.30942	6.48842	15.1683	1.06434e-47	3.57092e-47	96.8503	upregulate	5.59	7.9
SPRY4-IT1	1.58338	2.70237	15.1409	1.51018e-47	5.05336e-47	96.5018	upregulate	2.087	3.67
PNPLA3	2.11974	5.27879	15.0817	3.21841e-47	1.07161e-46	95.7482	upregulate	4.454	6.574
CDH15	2.04791	4.02264	14.9952	9.6631e-47	3.19224e-46	94.6532	upregulate	3.226	5.274
ICAM1	1.58015	12.1802	14.951	1.69255e-46	5.57256e-46	94.095	upregulate	11.566	13.146
TMEM158	1.77637	7.63772	14.9019	3.15214e-46	1.03322e-45	93.4757	upregulate	6.947	8.723
STRA6	2.39665	6.70027	14.8351	7.32703e-46	2.3875e-45	92.6357	upregulate	5.768	8.165
MCHR1	2.15729	4.31978	14.7836	1.40046e-45	4.53793e-45	91.9905	upregulate	3.481	5.638
MEGF10	2.31419	6.12731	14.7461	2.24439e-45	7.25179e-45	91.5209	upregulate	5.227	7.542
TM4SF19	2.25681	4.15529	14.7273	2.84099e-45	9.15606e-45	91.2862	upregulate	3.278	5.534
CILP2	1.73119	5.61707	14.7003	3.98382e-45	1.28238e-44	90.9495	upregulate	4.944	6.675
TNFRSF9	1.88823	5.62594	14.5724	1.96935e-44	6.2615e-44	89.3583	upregulate	4.892	6.78
IRX6	2.46355	6.41377	14.5503	2.59309e-44	8.2228e-44	89.0843	upregulate	5.456	7.919
LHFPL1	1.63379	3.58272	14.5381	3.01712e-44	9.55755e-44	88.9335	upregulate	2.947	4.581
HERC2P4	1.74216	4.54184	14.5059	4.49992e-44	1.42212e-43	88.5355	upregulate	3.864	5.606
RP11-872D17.8	1.65084	5.20207	14.458	8.14325e-44	2.557e-43	87.9449	upregulate	4.56	6.211
ATP10B	2.80424	6.52207	14.4477	9.25914e-44	2.90273e-43	87.8171	upregulate	5.432	8.236
MAPK8IP2	1.56037	7.75221	14.4315	1.13165e-43	3.54304e-43	87.6173	upregulate	7.145	8.706
ARSI	1.87105	6.90428	14.4311	1.13705e-43	3.55945e-43	87.6126	upregulate	6.177	8.048
ADCY1	1.57161	9.26337	14.4177	1.34093e-43	4.1873e-43	87.4484	upregulate	8.652	10.224
HOXB7	1.93044	8.34905	14.4101	1.47321e-43	4.59639e-43	87.3547	upregulate	7.598	9.529
TNC	1.6819	12.8455	14.4094	1.48596e-43	4.6355e-43	87.3461	upregulate	12.191	13.873
FAM83D	1.67219	8.06795	14.3548	2.91451e-43	9.04728e-43	86.6754	upregulate	7.418	9.09
UNC80	1.83241	5.18435	14.2793	7.37564e-43	2.27511e-42	85.7511	upregulate	4.472	6.304
CXCR2P1	2.18679	4.84361	14.2561	9.80056e-43	3.01532e-42	85.4681	upregulate	3.993	6.18
QPRT	1.57264	10.9584	14.2009	1.92772e-42	5.90228e-42	84.7947	upregulate	10.347	11.919
MCOLN3	1.89687	7.88676	14.1573	3.28219e-42	1.00152e-41	84.265	upregulate	7.149	9.046
KCNH1	1.71774	4.81268	14.1414	3.98662e-42	1.21491e-41	84.0714	upregulate	4.145	5.862
CHL1-AS2	1.78788	3.84656	14.0899	7.46562e-42	2.26838e-41	83.4469	upregulate	3.151	4.939
HR	1.84569	9.27161	14.0641	1.02087e-41	3.09397e-41	83.1354	upregulate	8.554	10.4
PHLDA2	1.63576	8.43605	14.0402	1.36436e-41	4.12453e-41	82.8468	upregulate	7.8	9.436
TBX18	1.82513	6.34767	14.0332	1.48499e-41	4.4848e-41	82.7624	upregulate	5.638	7.463
SLC24A4	1.84039	5.73551	13.998	2.27607e-41	6.85948e-41	82.3374	upregulate	5.02	6.86
KCNQ5	2.08374	6.33305	13.9872	2.59211e-41	7.80209e-41	82.208	upregulate	5.523	7.606
FAP	1.67133	7.84177	13.9739	3.04568e-41	9.15705e-41	82.0475	upregulate	7.192	8.863
MFAP2	1.62694	8.90113	13.8852	8.87878e-41	2.64983e-40	80.9826	upregulate	8.268	9.895
SPOCD1	1.93347	5.59452	13.8568	1.24994e-40	3.71905e-40	80.6422	upregulate	4.843	6.776
GJC3	1.63902	4.99068	13.7848	2.96433e-40	8.76302e-40	79.7828	upregulate	4.353	5.992
GNG4	2.01565	6.94375	13.7833	3.01622e-40	8.9115e-40	79.7655	upregulate	6.16	8.176
HAGLROS	1.71356	4.03453	13.7084	7.38575e-40	2.16459e-39	78.8743	upregulate	3.368	5.082
AL162151.3	2.49264	6.00773	13.6974	8.41803e-40	2.46377e-39	78.7442	upregulate	5.038	7.531
SLC35F1	1.77755	6.20015	13.6912	9.06714e-40	2.65159e-39	78.6702	upregulate	5.509	7.286
TAF7L	1.55381	3.24139	13.6627	1.27237e-39	3.7073e-39	78.3331	upregulate	2.637	4.191
ITGA10	1.83028	7.73648	13.6291	1.89641e-39	5.5069e-39	77.936	upregulate	7.025	8.855
CASKIN1	1.79235	4.70442	13.6269	1.94684e-39	5.6503e-39	77.9099	upregulate	4.007	5.8
LINC01314	2.14272	7.91327	13.6119	2.32681e-39	6.74581e-39	77.7325	upregulate	7.08	9.223
HOXA11	2.62709	5.39919	13.6023	2.60786e-39	7.55145e-39	77.619	upregulate	4.378	7.005
SRGAP2D	1.61306	5.72368	13.5196	6.93177e-39	1.99138e-38	76.6463	upregulate	5.096	6.709
FSD1	1.61705	3.93344	13.4814	1.08817e-38	3.11408e-38	76.1976	upregulate	3.305	4.922
MLPH	1.92233	11.4872	13.4615	1.37614e-38	3.93083e-38	75.964	upregulate	10.74	12.662
CYTL1	1.87525	6.4053	13.4604	1.3938e-38	3.98076e-38	75.9513	upregulate	5.676	7.551
RP11-360L9.8	1.80055	5.61921	13.3905	3.16768e-38	8.98499e-38	75.1345	upregulate	4.919	6.72
HCN1	1.904	3.10101	13.3715	3.95699e-38	1.1212e-37	74.9132	upregulate	2.361	4.265
MMP1	2.39089	6.07845	13.3021	8.909e-38	2.50486e-37	74.1058	upregulate	5.149	7.54
ART3	1.78076	4.23997	13.2816	1.13136e-37	3.17224e-37	73.8681	upregulate	3.547	5.328
C1QL1	1.6752	5.36553	13.2561	1.52132e-37	4.25234e-37	73.5735	upregulate	4.714	6.389
FCGR2C	1.55127	6.69276	13.213	2.51092e-37	6.98574e-37	73.0751	upregulate	6.089	7.641
STK32B	1.62972	8.14046	13.2076	2.67428e-37	7.43735e-37	73.0124	upregulate	7.507	9.136
CRNDE	1.52408	7.78292	13.1862	3.42789e-37	9.51842e-37	72.7654	upregulate	7.19	8.714
EVA1A	1.76806	8.79926	13.1597	4.65852e-37	1.29072e-36	72.4603	upregulate	8.112	9.88
EPHA5	2.18501	4.66072	13.1538	4.9864e-37	1.38068e-36	72.3926	upregulate	3.811	5.996
TEX15	1.93406	2.94552	13.1361	6.12416e-37	1.69223e-36	72.1882	upregulate	2.193	4.127
RFPL2	1.83012	2.69282	13.0992	9.37728e-37	2.58118e-36	71.7644	upregulate	1.981	3.811
TRPM8	2.69166	4.54551	13.0684	1.33692e-36	3.67435e-36	71.4117	upregulate	3.499	6.19
PTCRA	1.73314	3.20438	13.0625	1.43146e-36	3.93166e-36	71.3437	upregulate	2.53	4.264
POSTN	1.83101	11.4034	12.9939	3.14539e-36	8.58654e-36	70.5608	upregulate	10.691	12.522
ABCB4	1.73655	6.75186	12.9633	4.46531e-36	1.21574e-35	70.2123	upregulate	6.077	7.813
RP11-284F21.10	1.62467	6.01089	12.9538	4.98141e-36	1.35505e-35	70.1035	upregulate	5.379	7.004
LINC01010	1.55144	3.35112	12.9095	8.25749e-36	2.23688e-35	69.6009	upregulate	2.748	4.299
ABCC2	2.06754	7.21816	12.8775	1.1903e-35	3.21388e-35	69.2373	upregulate	6.414	8.482
ANO4	2.09442	5.32261	12.7808	3.56811e-35	9.5395e-35	68.1456	upregulate	4.508	6.603
CXCL9	1.88354	9.3531	12.6973	9.1696e-35	2.43098e-34	67.2071	upregulate	8.621	10.504
LINC00839	1.63328	6.45111	12.6551	1.47405e-34	3.88873e-34	66.7351	upregulate	5.816	7.449
SCD	1.71209	13.5117	12.6247	2.07272e-34	5.44939e-34	66.3962	upregulate	12.846	14.558
HOXD4	1.76562	5.26206	12.6094	2.46092e-34	6.45814e-34	66.2256	upregulate	4.575	6.341
KCNK2	1.85904	6.39229	12.489	9.44875e-34	2.45328e-33	64.8881	upregulate	5.669	7.528
WDR63	1.60462	5.65995	12.3885	2.88246e-33	7.4151e-33	63.7794	upregulate	5.036	6.641
APOC1	2.32458	10.6125	12.3874	2.91665e-33	7.50126e-33	63.7677	upregulate	9.708	12.033
BAALC	1.68247	8.17546	12.3744	3.36717e-33	8.6558e-33	63.6249	upregulate	7.521	9.204
XIRP1	1.94701	4.10286	12.1381	4.50369e-32	1.13455e-31	61.0475	upregulate	3.346	5.293
PTPRH	2.09499	6.91869	12.1332	4.74836e-32	1.19548e-31	60.9949	upregulate	6.104	8.199
DLX5	1.65919	4.58201	12.123	5.30816e-32	1.3347e-31	60.8842	upregulate	3.937	5.596
GDNF	1.93718	5.30749	12.0874	7.81154e-32	1.95913e-31	60.5003	upregulate	4.554	6.491
LINC00189	1.56963	3.06867	12.0261	1.51723e-31	3.78182e-31	59.8406	upregulate	2.458	4.028
FAM180B	1.72921	4.15019	12.0187	1.6445e-31	4.09478e-31	59.7606	upregulate	3.478	5.207
CHRNB2	1.54831	4.67747	11.9946	2.13168e-31	5.29621e-31	59.5028	upregulate	4.075	5.624
PCSK1	1.71354	5.13979	11.9417	3.76906e-31	9.33196e-31	58.9366	upregulate	4.473	6.187
TCN1	2.59365	5.2545	11.7743	2.25978e-30	5.51571e-30	57.1574	upregulate	4.246	6.84
RP11-766F14.2	1.94962	4.16137	11.7338	3.4737e-30	8.44512e-30	56.7303	upregulate	3.403	5.353
FAM133A	1.65459	3.3499	11.7086	4.53959e-30	1.1014e-29	56.4645	upregulate	2.706	4.361
ATP8A2	1.56483	6.85196	11.6537	8.10898e-30	1.9588e-29	55.8883	upregulate	6.243	7.808
DCSTAMP	1.87505	3.71918	11.5965	1.48075e-29	3.55691e-29	55.2903	upregulate	2.99	4.865
FLG	1.73242	6.75187	11.5742	1.87207e-29	4.48888e-29	55.0574	upregulate	6.078	7.811
COL19A1	1.78009	4.12234	11.4611	6.10454e-29	1.4521e-28	53.8837	upregulate	3.43	5.21
RP11-161H23.5	1.56004	9.92187	11.3841	1.35853e-28	3.20919e-28	53.0894	upregulate	9.315	10.875
LGI3	2.45794	6.98098	11.3679	1.60578e-28	3.79036e-28	52.9234	upregulate	6.025	8.483
SAP25	1.77355	4.20078	11.1703	1.22356e-27	2.83799e-27	50.9075	upregulate	3.511	5.285
DNASE2B	1.82474	4.14453	11.1606	1.35083e-27	3.12915e-27	50.8093	upregulate	3.435	5.26
KCNJ10	2.10534	6.71621	11.0942	2.65444e-27	6.11727e-27	50.1389	upregulate	5.897	8.003
MYEOV	1.93768	5.84001	10.8555	2.93063e-26	6.61414e-26	47.7559	upregulate	5.086	7.024
BCHE	1.63805	8.70111	10.7758	6.47301e-26	1.44979e-25	46.9698	upregulate	8.064	9.702
SYT6	1.58836	3.9799	10.7525	8.14975e-26	1.82287e-25	46.7413	upregulate	3.362	4.951
LINC01152	1.6084	4.44843	10.7459	8.70463e-26	1.94536e-25	46.6759	upregulate	3.823	5.431
RNF182	1.58099	6.25744	10.6097	3.32504e-25	7.33796e-25	45.3467	upregulate	5.643	7.224
CHL1	1.54689	10.1055	10.5418	6.45067e-25	1.41473e-24	44.6895	upregulate	9.504	11.051
CXCL13	2.11034	6.51129	10.4778	1.20087e-24	2.62272e-24	44.0733	upregulate	5.691	7.801
LINC01579	1.71963	3.38832	10.4027	2.48148e-24	5.38241e-24	43.3537	upregulate	2.72	4.439
RP11-386G11.10	1.54282	10.358	10.3276	5.10636e-24	1.10126e-23	42.6383	upregulate	9.758	11.301
TTYH1	1.67077	6.16792	10.2818	7.90936e-24	1.69844e-23	42.2046	upregulate	5.518	7.189
DGKI	1.53077	6.86467	10.1528	2.69233e-23	5.71301e-23	40.9906	upregulate	6.269	7.8
IGF2BP1	1.69476	3.38787	10.1154	3.82935e-23	8.09535e-23	40.6415	upregulate	2.729	4.424
LRRC15	1.59818	6.92742	9.93617	2.04432e-22	4.25854e-22	38.9821	upregulate	6.306	7.904
LINC01291	1.79088	5.65286	9.82538	5.68622e-22	1.17336e-21	37.9689	upregulate	4.956	6.747
NRG3	1.56065	5.35617	9.77894	8.70552e-22	1.79056e-21	37.5471	upregulate	4.749	6.31
APOC4-APOC2	2.05107	7.50343	9.70156	1.76366e-21	3.60749e-21	36.848	upregulate	6.706	8.757
COL2A1	1.76418	4.21585	9.54532	7.23273e-21	1.46013e-20	35.451	upregulate	3.53	5.294
PLA2G2D	1.72707	5.57125	9.33514	4.68316e-20	9.29458e-20	33.6026	upregulate	4.9	6.627
APOC2	1.82592	5.92111	8.87821	2.40634e-18	4.58742e-18	29.7076	upregulate	5.211	7.037
IGHG1	1.78243	13.9741	8.47782	6.60821e-17	1.21936e-16	26.4359	upregulate	13.281	15.063
HOXA13	1.71941	4.40148	8.44364	8.71517e-17	1.60332e-16	26.1627	upregulate	3.733	5.452
PI15	1.62752	7.70887	8.15101	8.9521e-16	1.6057e-15	23.8649	upregulate	7.076	8.703
ADAMDEC1	1.5511	5.74033	8.12836	1.06891e-15	1.91391e-15	23.69	upregulate	5.137	6.688
HOXA11-AS	1.54011	4.45796	8.07275	1.649e-15	2.93911e-15	23.2626	upregulate	3.859	5.399
CCL18	1.64747	7.55694	8.01505	2.57885e-15	4.57356e-15	22.8219	upregulate	6.916	8.564
SOX2	1.63219	5.2268	7.81231	1.21362e-14	2.11371e-14	21.296	upregulate	4.592	6.224
BAAT	1.72508	4.06635	7.37803	2.97938e-13	4.99918e-13	18.1469	upregulate	3.395	5.121
RPH3AL	-3.76242	8.17634	-55.7941	0	0	761.11	downregulate	9.639	5.877
MAGI1	-3.84184	9.84274	-59.0076	0	0	810.537	downregulate	11.337	7.495
SH3BGRL2	-4.46468	10.1966	-61.2997	0	0	845.002	downregulate	11.933	7.468
EGFR	-4.8779	10.6933	-56.9327	0	0	778.77	downregulate	12.59	7.712
ASXL3	-5.0154	4.93692	-55.2212	0	0	752.164	downregulate	6.887	1.872
OR7E14P	-5.02369	4.77271	-55.341	0	0	754.038	downregulate	6.726	1.703
GIPC2	-5.20043	7.02131	-56.0465	0	0	765.039	downregulate	9.044	3.843
HLF	-5.41948	8.75684	-58.5097	0	0	802.963	downregulate	10.864	5.445
ADIRF	-5.59157	9.97571	-57.0119	0	0	779.993	downregulate	12.15	6.559
SAMD12	-5.63374	7.43406	-58.8585	0	0	808.273	downregulate	9.625	3.991
C11ORF52	-5.68886	7.01173	-58.9063	0	0	808.998	downregulate	9.224	3.535
ANK3	-5.69635	9.40444	-56.5544	0	0	772.921	downregulate	11.62	5.923
MAOA	-5.75731	10.8097	-65.4064	0	0	905.107	downregulate	13.049	7.291
RERGL	-5.88159	4.72548	-58.583	0	0	804.08	downregulate	7.013	1.131
TMEM30B	-5.89723	9.15172	-63.791	0	0	881.715	downregulate	11.445	5.548
KCNK1	-5.92146	7.18164	-57.2287	0	0	783.335	downregulate	9.484	3.563
ZBTB16	-5.94562	6.75924	-56.4469	0	0	771.255	downregulate	9.071	3.126
MPP7	-5.99862	8.27743	-59.1351	0	0	812.472	downregulate	10.61	4.612
CHMP4C	-6.00466	6.93396	-57.3874	0	0	785.779	downregulate	9.269	3.264
CTD-2396E7.11	-6.17996	5.96359	-57.0689	0	0	780.872	downregulate	8.367	2.187
EPB41L4B	-6.23697	8.37715	-54.0918	0	0	734.407	downregulate	10.803	4.566
FAM110C	-6.25996	7.10341	-55.2377	0	0	752.422	downregulate	9.538	3.278
SSTR1	-6.54886	5.32172	-56.5866	0	0	773.42	downregulate	7.868	1.32
RGN	-6.56585	6.66336	-57.9945	0	0	795.094	downregulate	9.217	2.651
SOWAHB	-6.79463	5.60421	-60.1625	0	0	827.984	downregulate	8.247	1.452
SHANK2	-6.94889	7.56506	-61.1049	0	0	842.099	downregulate	10.267	3.319
FGFR2	-7.19547	8.85178	-70.3426	0	0	974.597	downregulate	11.65	4.455
C1ORF210	-7.62702	6.092	-60.2396	0	0	829.143	downregulate	9.058	1.431
RP4-568C11.4	-7.64235	6.29752	-62.9996	0	0	870.137	downregulate	9.27	1.627
SCNN1A	-7.69549	9.303	-54.7023	0	0	744.025	downregulate	12.296	4.6
PRR15L	-8.05522	6.54112	-58.5815	0	0	804.057	downregulate	9.674	1.618
ELF3	-8.31212	8.9667	-55.47	0	0	756.054	downregulate	12.199	3.887
MAL2	-8.33336	9.4368	-57.7401	0	0	791.195	downregulate	12.678	4.344
EPCAM	-8.85588	8.77933	-58.8356	0	0	807.924	downregulate	12.223	3.367
KRT19	-9.02955	9.46227	-56.0461	0	0	765.033	downregulate	12.974	3.944
TJP3	-6.72059	7.19286	-53.1773	1.26629025029111e-318	5.23708423537454e-316	719.916	downregulate	9.806	3.086
MARVELD3	-5.86254	6.74113	-53.1365	2.424498699898e-318	9.83797530641463e-316	719.267	downregulate	9.021	3.158
CRB3	-6.01118	6.87114	-52.9448	5.13820168998305e-317	2.00913028266821e-314	716.217	downregulate	9.209	3.198
FAAH2	-5.02914	6.57443	-52.7709	8.24249410636251e-316	3.16541211162919e-313	713.444	downregulate	8.53	3.501
METTL7A	-3.79709	11.9875	-52.7117	2.12081225868692e-315	8.00178744478188e-313	712.5	downregulate	13.464	9.667
MARVELD2	-5.55512	8.05712	-52.5772	1.81797199975495e-314	6.74091479771446e-312	710.353	downregulate	10.217	4.662
ACADL	-6.79267	5.84238	-52.5213	4.44288525896327e-314	1.61358134055617e-311	709.46	downregulate	8.484	1.691
GRHL2	-7.91066	6.82871	-52.2216	5.39384656139383e-312	0	704.666	downregulate	9.905	1.994
GRB7	-6.33019	7.07976	-52.1208	2.71826915595276e-311	0	703.05	downregulate	9.542	3.211
ASS1	-5.47164	11.0793	-52.0117	1.5650907884101e-310	5.25919e-308	701.301	downregulate	13.207	7.736
SDPR	-5.15114	10.0016	-51.8696	0	5.07259e-307	699.021	downregulate	12.005	6.854
C1QTNF7	-5.3731	6.30142	-51.6624	4.29774e-308	1.40041e-305	695.69	downregulate	8.391	3.018
PRSS8	-8.25758	8.68975	-51.4585	1.14731e-306	3.6827e-304	692.409	downregulate	11.901	3.643
NUDT16P1	-4.02533	6.65931	-51.4443	1.44198e-306	4.56046e-304	692.18	downregulate	8.225	4.199
ATP8B1	-4.14597	9.97914	-51.3122	1.21466e-305	3.62813e-303	690.051	downregulate	11.591	7.445
PLIN5	-5.22661	6.21412	-51.2862	1.84659e-305	5.44009e-303	689.633	downregulate	8.247	3.02
DDAH1	-3.86777	10.6319	-51.0639	6.7038e-304	1.94827e-301	686.044	downregulate	12.136	8.268
FAM150B	-5.10969	4.51238	-50.9826	2.49448e-303	7.15285e-301	684.731	downregulate	6.499	1.39
ESRP2	-6.47047	8.03416	-50.7679	8.06762e-302	2.28292e-299	681.258	downregulate	10.55	4.08
RAI2	-4.08878	8.6906	-50.7501	1.07572e-301	3.00446e-299	680.97	downregulate	10.281	6.192
FAAH	-3.88983	8.7103	-50.7316	1.45173e-301	4.00268e-299	680.671	downregulate	10.223	6.333
KIAA2022	-5.36842	4.73325	-50.7277	1.54687e-301	4.21101e-299	680.607	downregulate	6.821	1.453
RPS6KA6	-5.84832	6.42717	-50.7218	1.70324e-301	4.57874e-299	680.511	downregulate	8.702	2.853
TMC4	-5.61607	8.83881	-50.5402	3.23472e-300	8.58839e-298	677.57	downregulate	11.023	5.407
NEBL	-6.0494	9.24099	-50.5258	4.08642e-300	1.07174e-297	677.336	downregulate	11.594	5.544
COLCA1	-5.84237	6.87631	-50.4662	1.07519e-299	2.78591e-297	676.37	downregulate	9.148	3.306
TSPAN12	-4.5262	9.08731	-50.3549	6.55775e-299	1.67894e-296	674.563	downregulate	10.847	6.321
THSD4	-4.39593	9.71042	-50.1606	1.54448e-297	3.8179e-295	671.407	downregulate	11.42	7.024
AP1M2	-7.76725	7.58462	-50.0944	4.53893e-297	1.10925e-294	670.329	downregulate	10.605	2.838
RGS7BP	-4.90972	4.30511	-50.0143	1.67204e-296	4.04032e-294	669.027	downregulate	6.214	1.305
CCDC68	-5.50227	6.0963	-49.9138	8.59205e-296	2.05312e-293	667.391	downregulate	8.236	2.734
TCEAL2	-6.56802	5.37773	-49.9086	9.35914e-296	2.21184e-293	667.306	downregulate	7.932	1.364
RP11-392P7.6	-3.5101	5.87568	-49.8013	5.38563e-295	1.25895e-292	665.557	downregulate	7.241	3.731
INADL	-3.7176	10.2312	-49.7413	1.43187e-294	3.31117e-292	664.58	downregulate	11.677	7.959
FAM107A	-4.85979	9.55102	-49.6263	9.3595e-294	2.14133e-291	662.704	downregulate	11.441	6.581
PLEKHA7	-3.88656	8.99314	-49.568	2.42618e-293	5.49236e-291	661.753	downregulate	10.505	6.618
OCLN	-4.49092	9.38304	-49.4535	1.57753e-292	3.534e-290	659.882	downregulate	11.13	6.639
DUSP1	-3.98557	13.0782	-49.4402	1.95841e-292	4.34203e-290	659.666	downregulate	14.628	10.643
KDF1	-6.20551	6.52217	-49.0281	1.6699e-289	3.62756e-287	652.923	downregulate	8.935	2.73
THRB	-4.53521	8.77823	-48.9294	8.43348e-289	1.81371e-286	651.305	downregulate	10.542	6.007
ERICH5	-5.02118	4.46997	-48.8548	2.86753e-288	6.10584e-286	650.083	downregulate	6.423	1.401
GPRC5C	-4.78902	9.85643	-48.8385	3.75051e-288	7.9077e-286	649.814	downregulate	11.719	6.93
PBX1	-4.39026	10.6359	-48.7746	1.07034e-287	2.23483e-285	648.767	downregulate	12.343	7.953
FAM201A	-4.73301	4.32514	-48.5513	4.2084e-286	8.61961e-284	645.098	downregulate	6.166	1.433
RASL11A	-3.42778	8.05123	-48.5239	6.60737e-286	1.34055e-283	644.647	downregulate	9.384	5.956
PRRG2	-4.06052	7.0041	-48.4504	2.21404e-285	4.45002e-283	643.439	downregulate	8.583	4.523
NMNAT3	-3.96854	6.98382	-48.4496	2.24324e-285	4.46696e-283	643.426	downregulate	8.527	4.559
EXPH5	-4.72415	7.67634	-48.4207	3.60721e-285	7.11713e-283	642.951	downregulate	9.514	4.789
CD24	-7.51449	11.4822	-48.2059	1.24348e-283	2.3877e-281	639.414	downregulate	14.404	6.89
CYP4X1	-4.9189	6.74602	-48.1888	1.649e-283	3.13835e-281	639.132	downregulate	8.659	3.74
CLDN3	-7.79621	7.04172	-48.0508	1.60528e-282	3.00202e-280	636.858	downregulate	10.074	2.277
VSIG2	-7.15062	6.40797	-47.8274	6.43643e-281	1.18309e-278	633.17	downregulate	9.189	2.038
RASSF6	-6.09806	6.57207	-47.7793	1.42423e-280	2.59571e-278	632.376	downregulate	8.944	2.845
RBM47	-4.25972	10.8659	-47.5142	1.14625e-278	2.03729e-276	627.992	downregulate	12.522	8.263
BTC	-5.41166	6.18672	-47.3341	2.26591e-277	3.96184e-275	625.01	downregulate	8.291	2.88
ZBED9	-4.81395	5.13773	-47.2338	1.19631e-276	2.07483e-274	623.348	downregulate	7.01	2.196
CLDN7	-5.69711	9.25865	-47.193	2.35467e-276	4.05116e-274	622.671	downregulate	11.474	5.777
ADH1C	-7.56575	6.68603	-47.1202	7.88246e-276	1.3348e-273	621.464	downregulate	9.628	2.063
CLDN4	-7.19808	9.76206	-47.1163	8.40649e-276	1.41242e-273	621.399	downregulate	12.561	5.363
NR3C2	-3.91737	9.1205	-47.0669	1.91072e-275	3.16091e-273	620.579	downregulate	10.644	6.727
CDS1	-5.06391	8.58618	-47.0562	2.28281e-275	3.74765e-273	620.401	downregulate	10.555	5.492
TMEM45B	-6.98899	6.9333	-47.0557	2.30253e-275	3.75138e-273	620.393	downregulate	9.651	2.662
TMEM125	-7.22354	6.73924	-47.0431	2.83821e-275	4.58937e-273	620.184	downregulate	9.548	2.325
NPNT	-5.16182	9.7128	-46.8427	7.93113e-274	1.26346e-271	616.856	downregulate	11.72	6.558
ABCC6	-5.15017	7.40149	-46.8021	1.55996e-273	2.4668e-271	616.18	downregulate	9.404	4.254
KRT8	-6.08128	11.9842	-46.7981	1.66677e-273	2.61646e-271	616.114	downregulate	14.349	8.268
ACSM1	-4.81098	4.19702	-46.7284	5.31003e-273	8.21565e-271	614.956	downregulate	6.068	1.257
SGSM1	-4.53478	6.31986	-46.6997	8.56421e-273	1.31559e-270	614.479	downregulate	8.083	3.549
ADH1B	-8.65906	9.49589	-46.666	1.5016e-272	2.29031e-270	613.918	downregulate	12.863	4.204
NAP1L2	-4.67049	6.42557	-46.576	6.72291e-272	1.01107e-269	612.42	downregulate	8.242	3.571
ZNF204P	-5.03201	7.0168	-46.5519	1.00443e-271	1.50009e-269	612.019	downregulate	8.974	3.942
AKR1C3	-4.88991	9.24605	-46.5314	1.4146e-271	2.0981e-269	611.676	downregulate	11.148	6.258
IRF6	-5.73941	9.55765	-46.4385	6.6562e-271	9.73797e-269	610.129	downregulate	11.79	6.05
CGNL1	-5.00646	10.2239	-46.3718	2.02321e-270	2.93994e-268	609.018	downregulate	12.171	7.164
C2ORF40	-6.26226	6.60289	-46.1205	1.34347e-268	1.90083e-266	604.826	downregulate	9.038	2.776
PTPRD-AS1	-3.93029	3.55107	-45.9871	1.24857e-267	1.75502e-265	602.598	downregulate	5.08	1.149
ANGPTL1	-4.85521	7.75998	-45.8873	6.62613e-267	9.25335e-265	600.931	downregulate	9.648	4.793
PPAP2B	-3.12644	11.8704	-45.6658	2.70214e-265	3.72514e-263	597.225	downregulate	13.086	9.96
ABO	-5.71033	7.24413	-45.5691	1.36554e-264	1.84699e-262	595.606	downregulate	9.465	3.754
LNX1	-3.43413	8.18056	-45.5247	2.87485e-264	3.86416e-262	594.863	downregulate	9.516	6.082
SPINT2	-4.86688	11.514	-45.4098	1.97436e-263	2.62103e-261	592.937	downregulate	13.407	8.54
NSUN7	-4.72519	6.1763	-45.3386	6.51899e-263	8.49682e-261	591.744	downregulate	8.014	3.289
PRKAA2	-5.82264	7.16428	-45.2617	2.37208e-262	3.05472e-260	590.453	downregulate	9.429	3.606
MYZAP	-5.25344	7.79269	-44.9193	7.48493e-260	9.52491e-258	584.703	downregulate	9.836	4.582
THRB-AS1	-3.2048	3.0794	-44.832	3.25549e-259	4.11839e-257	583.234	downregulate	4.326	1.121
ALDH2	-4.16661	12.5545	-44.8292	3.41267e-259	4.29198e-257	583.187	downregulate	14.175	10.008
MAP7	-3.7033	9.53089	-44.7572	1.1456e-258	1.42412e-256	581.977	downregulate	10.971	7.268
RP11-477H21.2	-3.01694	2.90571	-44.7564	1.16241e-258	1.43671e-256	581.963	downregulate	4.079	1.062
SYBU	-4.1654	8.35233	-44.7404	1.52046e-258	1.86851e-256	581.694	downregulate	9.972	5.807
SDR42E1	-4.70753	7.29322	-44.6979	3.11316e-258	3.80407e-256	580.978	downregulate	9.124	4.416
RP11-255H23.2	-4.5852	5.22692	-44.586	2.05064e-257	2.49158e-255	579.095	downregulate	7.01	2.425
MLK4	-4.4485	7.19755	-44.583	2.15564e-257	2.60445e-255	579.045	downregulate	8.928	4.479
ACE2	-5.39486	5.61037	-44.5662	2.86059e-257	3.43686e-255	578.762	downregulate	7.708	2.314
GREM2	-5.65277	5.75108	-44.3774	6.91178e-256	8.21241e-254	575.58	downregulate	7.949	2.297
COLCA2	-4.09758	5.60693	-44.1875	1.70556e-254	1.98269e-252	572.376	downregulate	7.2	3.103
MYO5C	-3.86746	9.43796	-44.116	5.70587e-254	6.52715e-252	571.17	downregulate	10.942	7.075
SYNE4	-4.21725	6.13876	-44.0777	1.09107e-253	1.24151e-251	570.522	downregulate	7.779	3.562
WBSCR17	-5.27129	6.18065	-44.0275	2.54834e-253	2.88445e-251	569.674	downregulate	8.231	2.959
TMPRSS2	-6.93695	8.83722	-43.9874	5.01685e-253	5.61939e-251	568.998	downregulate	11.535	4.598
RAB25	-7.56904	7.72882	-43.8781	3.18779e-252	3.53384e-250	567.15	downregulate	10.672	3.103
PACRG	-4.3372	5.28837	-43.8701	3.65131e-252	4.02692e-250	567.014	downregulate	6.975	2.638
PGR	-5.53281	6.41988	-43.8567	4.57775e-252	5.02292e-250	566.788	downregulate	8.572	3.039
AR	-5.05283	8.5032	-43.8043	1.11172e-251	1.2075e-249	565.902	downregulate	10.468	5.415
AC073283.4	-4.38177	3.89588	-43.6481	1.56618e-250	1.67574e-248	563.258	downregulate	5.6	1.218
NPR3	-5.57451	8.09415	-43.3381	2.99735e-248	3.12917e-246	558.008	downregulate	10.262	4.688
C8ORF4	-4.7021	9.93761	-43.3335	3.24231e-248	3.36855e-246	557.93	downregulate	11.766	7.064
RP11-736K20.4	-3.81818	6.20275	-43.2854	7.33328e-248	7.58219e-246	557.114	downregulate	7.688	3.869
CLU	-5.02769	13.5869	-43.1848	4.04291e-247	4.16014e-245	555.408	downregulate	15.542	10.514
PIGR	-9.31024	8.94469	-43.1478	7.58273e-247	7.76543e-245	554.78	downregulate	12.565	3.255
ITGB6	-7.33663	7.55571	-43.1291	1.04254e-246	1.0626e-244	554.462	downregulate	10.409	3.072
RASSF9	-4.24099	6.88062	-43.103	1.62299e-246	1.64642e-244	554.02	downregulate	8.53	4.289
AKR1C1	-5.19493	9.01646	-43.0264	5.96827e-246	5.99783e-244	552.718	downregulate	11.037	5.842
NTN4	-4.50736	10.2315	-43.0068	8.32447e-246	8.32679e-244	552.386	downregulate	11.984	7.477
LINC01354	-3.61456	3.74702	-42.9314	2.99708e-245	2.97029e-243	551.106	downregulate	5.153	1.538
CLEC3B	-4.03635	9.77342	-42.8751	7.81354e-245	7.63809e-243	550.148	downregulate	11.343	7.307
PID1	-4.33306	8.19483	-42.733	8.75337e-244	8.47973e-242	547.734	downregulate	9.88	5.547
KIAA1217	-3.15139	11.0576	-42.7156	1.17845e-243	1.13649e-241	547.437	downregulate	12.283	9.132
TSPAN8	-7.13887	6.95806	-42.6308	4.98597e-243	4.78698e-241	545.996	downregulate	9.734	2.595
SYTL4	-3.04741	8.80738	-42.5815	1.15486e-242	1.10384e-240	545.156	downregulate	9.992	6.945
MUC20	-4.79617	8.33227	-42.5681	1.4502e-242	1.38e-240	544.929	downregulate	10.197	5.401
SLC16A9	-5.84198	6.78318	-42.5281	2.8665e-242	2.70381e-240	544.248	downregulate	9.055	3.213
ARHGEF38	-5.73913	5.0218	-42.5029	4.4038e-242	4.13573e-240	543.819	downregulate	7.254	1.515
KRT7	-7.41798	9.03738	-42.4721	7.44016e-242	6.95688e-240	543.295	downregulate	11.922	4.504
RP3-406A7.7	-3.2319	3.44235	-42.3406	6.99964e-241	6.40571e-239	541.055	downregulate	4.699	1.467
ILDR1	-5.54885	6.3129	-42.3131	1.11796e-240	1.01876e-238	540.587	downregulate	8.471	2.922
LINC01558	-3.52955	3.81123	-42.2966	1.48228e-240	1.34506e-238	540.305	downregulate	5.184	1.654
CHDH	-4.74765	8.52257	-42.2703	2.31884e-240	2.09533e-238	539.858	downregulate	10.369	5.621
GGT6	-7.55334	6.38071	-42.2466	3.47682e-240	3.12855e-238	539.453	downregulate	9.318	1.765
PLEKHG6	-5.27031	6.43417	-42.1937	8.56498e-240	7.67494e-238	538.552	downregulate	8.484	3.213
MAN1A1	-3.30725	11.1795	-42.1912	8.94953e-240	7.98625e-238	538.509	downregulate	12.466	9.158
PKP2	-5.48049	7.45333	-42.1172	3.16043e-239	2.78558e-237	537.248	downregulate	9.585	4.104
SEPP1	-3.89406	13.3391	-41.7418	1.92492e-236	1.62982e-234	530.841	downregulate	14.853	10.959
AGR2	-8.44487	6.84614	-41.6756	5.97176e-236	4.99722e-234	529.71	downregulate	10.13	1.685
KCND3	-4.23712	7.75736	-41.652	8.94529e-236	7.4277e-234	529.306	downregulate	9.405	5.168
RORC	-5.33386	8.46207	-41.644	1.02534e-235	8.48113e-234	529.169	downregulate	10.536	5.202
TSPAN1	-6.25992	9.22373	-41.6367	1.16102e-235	9.56662e-234	529.045	downregulate	11.658	5.398
GSTO2	-3.71865	7.97443	-41.5346	6.65702e-235	5.44357e-233	527.3	downregulate	9.421	5.702
PROM2	-6.26989	8.43656	-41.4974	1.25863e-234	1.02531e-232	526.664	downregulate	10.875	4.605
IL20RA	-5.95509	6.02672	-41.3751	1.02181e-233	8.19965e-232	524.571	downregulate	8.343	2.388
NUP62CL	-3.94926	4.65273	-41.1842	2.68598e-232	2.10053e-230	521.305	downregulate	6.189	2.239
SHROOM3	-4.23785	10.2329	-41.1407	5.65897e-232	4.40948e-230	520.56	downregulate	11.881	7.643
LGR6	-4.62586	6.15863	-41.1299	6.81248e-232	5.28914e-230	520.375	downregulate	7.958	3.332
RHOU	-3.3108	9.90764	-41.1191	8.20408e-232	6.34666e-230	520.189	downregulate	11.195	7.884
ARHGAP44	-3.8886	8.08203	-41.0592	2.29046e-231	1.75924e-229	519.163	downregulate	9.594	5.706
DSCAML1	-4.25761	4.84165	-41.0351	3.46153e-231	2.64924e-229	518.75	downregulate	6.497	2.24
TCEAL7	-4.01329	5.80227	-41.0046	5.8336e-231	4.43312e-229	518.229	downregulate	7.363	3.35
FAM3B	-5.52267	6.76705	-40.9872	7.86483e-231	5.95567e-229	517.93	downregulate	8.915	3.392
AGTR1	-5.15804	6.4533	-40.9502	1.48321e-230	1.11531e-228	517.296	downregulate	8.459	3.301
MYOCD	-5.50334	5.65544	-40.8831	4.6944e-230	3.50548e-228	516.145	downregulate	7.796	2.292
NOSTRIN	-3.32227	8.3414	-40.8684	6.03229e-230	4.47346e-228	515.894	downregulate	9.633	6.311
TMEM184A	-5.47061	6.73605	-40.8258	1.25319e-229	9.22986e-228	515.164	downregulate	8.864	3.393
RIC3	-4.39191	6.52958	-40.8204	1.37596e-229	1.00994e-227	515.071	downregulate	8.238	3.846
ANKEF1	-3.24419	7.60103	-40.8186	1.4181e-229	1.03734e-227	515.04	downregulate	8.863	5.618
METTL24	-3.66343	3.77185	-40.812	1.58867e-229	1.15817e-227	514.927	downregulate	5.197	1.533
CRIM1	-3.06689	11.6559	-40.795	2.12826e-229	1.54629e-227	514.635	downregulate	12.849	9.782
MFSD6L	-4.79019	4.45838	-40.7713	3.19714e-229	2.3073e-227	514.228	downregulate	6.321	1.531
LINC01018	-5.0726	4.29116	-40.7237	7.22797e-229	5.16427e-227	513.413	downregulate	6.264	1.191
CYS1	-5.2869	7.5552	-40.721	7.57538e-229	5.39457e-227	513.366	downregulate	9.611	4.324
LIFR	-4.38188	10.5142	-40.5704	1.00609e-227	7.07091e-226	510.782	downregulate	12.218	7.836
ACTR3C	-3.56031	6.47698	-40.5273	2.10852e-227	1.46277e-225	510.042	downregulate	7.862	4.301
ID1	-3.78308	10.3374	-40.4135	1.4915e-226	1.01187e-224	508.087	downregulate	11.809	8.026
SPTLC3	-3.60102	8.62519	-40.408	1.63738e-226	1.10734e-224	507.994	downregulate	10.026	6.425
MIR99AHG	-3.84464	6.43209	-40.3937	2.09554e-226	1.41275e-224	507.748	downregulate	7.927	4.083
BSPRY	-4.91457	7.58052	-40.3844	2.45788e-226	1.65185e-224	507.588	downregulate	9.492	4.577
DIRAS3	-3.26427	6.31305	-40.382	2.5606e-226	1.71552e-224	507.547	downregulate	7.582	4.318
ZDHHC15	-4.2651	5.75559	-40.3438	4.93803e-226	3.28784e-224	506.891	downregulate	7.414	3.149
RNF180	-3.60772	7.72282	-40.3345	5.79222e-226	3.84468e-224	506.732	downregulate	9.126	5.518
GSTM5	-4.32476	7.0379	-40.2877	1.29494e-225	8.51649e-224	505.928	downregulate	8.72	4.395
AQP7	-5.15817	6.36136	-40.244	2.74618e-225	1.80059e-223	505.177	downregulate	8.367	3.209
HGD	-7.16181	5.94178	-40.2283	3.60009e-225	2.3533e-223	504.906	downregulate	8.727	1.565
TSLP	-4.04498	5.19766	-40.2194	4.19415e-225	2.73332e-223	504.754	downregulate	6.771	2.726
ECHDC2	-2.96548	10.5133	-40.2096	4.96514e-225	3.22599e-223	504.585	downregulate	11.667	8.701
CYP4F12	-5.39164	5.46912	-40.1767	8.74585e-225	5.66531e-223	504.019	downregulate	7.566	2.174
EDN1	-4.03543	7.79787	-40.0595	6.56819e-224	4.22921e-222	502.004	downregulate	9.367	5.332
ADAMTSL3	-3.8354	8.07593	-40.0279	1.13051e-223	7.25752e-222	501.462	downregulate	9.567	5.732
SGMS2	-3.24191	9.82895	-40.0175	1.35329e-223	8.66185e-222	501.282	downregulate	11.09	7.848
SMIM22	-6.1893	5.30454	-40.0172	1.35938e-223	8.67504e-222	501.278	downregulate	7.711	1.522
CAPN6	-5.57311	6.5443	-39.9868	2.29534e-223	1.45187e-221	500.754	downregulate	8.712	3.139
TSTD1	-3.88204	9.07304	-39.979	2.62477e-223	1.65054e-221	500.62	downregulate	10.583	6.701
ANKRD18A	-3.85063	3.75044	-39.902	9.88104e-223	6.15947e-221	499.296	downregulate	5.248	1.397
GPR39	-4.63191	6.17701	-39.897	1.0776e-222	6.69791e-221	499.209	downregulate	7.978	3.346
ACSM3	-4.49638	8.06783	-39.8821	1.39096e-222	8.59597e-221	498.954	downregulate	9.816	5.32
DLG2	-3.48336	6.81387	-39.8783	1.48582e-222	9.15587e-221	498.888	downregulate	8.169	4.685
RP11-490M8.1	-2.97776	3.82533	-39.8705	1.70038e-222	1.04481e-220	498.753	downregulate	4.983	2.006
ZNF385B	-5.31357	6.03375	-39.7289	1.94688e-221	1.18276e-219	496.317	downregulate	8.1	2.787
FRK	-3.27993	8.83794	-39.7078	2.80231e-221	1.69288e-219	495.953	downregulate	10.113	6.834
AC006273.5	-3.93942	3.34805	-39.6934	3.59253e-221	2.16417e-219	495.705	downregulate	4.88	0.941
RP11-762L8.6	-3.42516	4.15134	-39.6924	3.65168e-221	2.19366e-219	495.689	downregulate	5.483	2.058
ZC3H12B	-3.06347	6.00264	-39.6898	3.82297e-221	2.29016e-219	495.643	downregulate	7.194	4.131
DRD1	-3.76439	3.50408	-39.6397	9.05953e-221	5.39707e-219	494.781	downregulate	4.968	1.204
CAMSAP3	-5.07634	8.05733	-39.6266	1.13623e-220	6.75019e-219	494.554	downregulate	10.031	4.955
NRG1	-4.56742	6.90187	-39.5453	4.61566e-220	2.71957e-218	493.154	downregulate	8.678	4.111
KRT222	-3.35588	4.38363	-39.449	2.4253e-219	1.41735e-217	491.496	downregulate	5.689	2.333
WFDC2	-6.47016	8.48549	-39.4124	4.56382e-219	2.65269e-217	490.864	downregulate	11.002	4.532
GCNT4	-3.70212	7.05361	-39.3852	7.29031e-219	4.21466e-217	490.396	downregulate	8.493	4.791
LINC01106	-3.74379	7.2869	-39.3749	8.71137e-219	5.00927e-217	490.218	downregulate	8.743	4.999
ENPP4	-3.80714	9.20127	-39.3712	9.27976e-219	5.32188e-217	490.155	downregulate	10.682	6.875
AC113188.2	-3.78	3.55374	-39.3651	1.03073e-218	5.89543e-217	490.05	downregulate	5.024	1.244
TMEM47	-3.66152	9.86302	-39.284	4.17928e-218	2.36525e-216	488.651	downregulate	11.287	7.625
SLPI	-7.19272	8.84329	-39.2088	1.53027e-217	8.52588e-216	487.354	downregulate	11.64	4.448
AKR1C2	-5.15396	8.45902	-39.2056	1.61765e-217	8.98943e-216	487.299	downregulate	10.463	5.309
ADCY5	-4.27851	8.25137	-39.2041	1.65981e-217	9.17633e-216	487.273	downregulate	9.915	5.637
LINC00908	-4.02932	3.61093	-39.18	2.51573e-217	1.38019e-215	486.858	downregulate	5.178	1.149
ABLIM1	-3.14703	12.1314	-39.1782	2.59488e-217	1.41999e-215	486.827	downregulate	13.355	10.208
CCDC158	-3.54589	3.38415	-39.1602	3.54183e-217	1.93326e-215	486.516	downregulate	4.763	1.217
NCMAP	-5.12925	5.6414	-39.1381	5.17933e-217	2.81992e-215	486.136	downregulate	7.636	2.507
ELMO3	-3.72476	8.4742	-39.0979	1.03711e-216	5.63233e-215	485.442	downregulate	9.923	6.198
TRPV6	-5.33323	5.555	-39.0571	2.10021e-216	1.13485e-214	484.737	downregulate	7.629	2.296
RNF152	-3.35557	9.3283	-39.0557	2.1511e-216	1.15944e-214	484.713	downregulate	10.633	7.278
PDZK1IP1	-7.0883	7.24609	-39.0546	2.19245e-216	1.17877e-214	484.694	downregulate	10.003	2.914
CPAMD8	-4.4881	8.17736	-38.9966	5.96607e-216	3.19966e-214	483.694	downregulate	9.923	5.435
ADAMTS9-AS2	-3.98341	5.07016	-38.9642	1.04352e-215	5.56874e-214	483.135	downregulate	6.619	2.636
TSPAN2	-4.12576	7.20826	-38.9262	2.01234e-215	1.07122e-213	482.479	downregulate	8.813	4.687
MAPK10	-3.87331	7.91296	-38.8866	3.98568e-215	2.10604e-213	481.796	downregulate	9.419	5.546
PITPNM3	-3.53472	8.0243	-38.8841	4.16658e-215	2.19624e-213	481.752	downregulate	9.399	5.864
AC069213.1	-4.23321	5.42045	-38.8809	4.40021e-215	2.31371e-213	481.697	downregulate	7.067	2.833
VIPR1	-5.3974	7.50259	-38.8619	6.10862e-215	3.18864e-213	481.37	downregulate	9.602	4.204
KRTCAP3	-4.13684	7.27245	-38.8328	1.01033e-214	5.26106e-213	480.867	downregulate	8.881	4.744
SH3RF2	-5.1642	6.95653	-38.8297	1.06509e-214	5.53282e-213	480.814	downregulate	8.965	3.801
BEX5	-4.12686	6.06777	-38.8246	1.16334e-214	6.0286e-213	480.726	downregulate	7.673	3.546
SLC16A11	-3.84102	5.57299	-38.7844	2.33199e-214	1.20268e-212	480.031	downregulate	7.067	3.226
SCN7A	-5.94555	5.97524	-38.7659	3.20701e-214	1.65e-212	479.713	downregulate	8.287	2.342
REEP1	-3.93315	6.69046	-38.7646	3.28411e-214	1.68563e-212	479.689	downregulate	8.22	4.287
KCNJ11	-3.88353	5.70272	-38.6771	1.48929e-213	7.60774e-212	478.178	downregulate	7.213	3.329
STEAP2	-4.01776	8.5579	-38.6288	3.43428e-213	1.75018e-211	477.343	downregulate	10.12	6.103
GPM6A	-5.51052	6.63095	-38.5743	8.81075e-213	4.46896e-211	476.402	downregulate	8.774	3.263
OGN	-5.8964	7.55559	-38.5566	1.19686e-212	6.0422e-211	476.096	downregulate	9.849	3.952
ACOX2	-3.93402	8.32242	-38.5359	1.70995e-212	8.61224e-211	475.739	downregulate	9.852	5.918
RBM24	-4.35506	5.09084	-38.4154	1.37393e-211	6.80822e-210	473.657	downregulate	6.784	2.429
LEPR	-3.51607	9.51892	-38.3351	5.51137e-211	2.7123e-209	472.269	downregulate	10.886	7.37
PHYHD1	-3.38596	8.95001	-38.3152	7.77512e-211	3.80026e-209	471.925	downregulate	10.267	6.881
FAT4	-3.12344	8.96357	-38.2698	1.7078e-210	8.3095e-209	471.139	downregulate	10.178	7.055
CNGA1	-4.35499	5.2956	-38.2315	3.31416e-210	1.60528e-208	470.477	downregulate	6.989	2.634
MGST1	-5.09894	10.5744	-38.2083	4.9454e-210	2.39002e-208	470.077	downregulate	12.557	7.458
RANBP3L	-5.2198	5.38621	-38.165	1.04595e-209	5.03224e-208	469.328	downregulate	7.416	2.196
RIMBP2	-4.33358	4.49768	-38.1548	1.24969e-209	5.99909e-208	469.15	downregulate	6.183	1.849
DMRTC1B	-4.00233	3.75326	-38.1478	1.41018e-209	6.75443e-208	469.03	downregulate	5.31	1.307
PGM5	-4.26249	9.30403	-38.0628	6.13744e-209	2.92017e-207	467.56	downregulate	10.962	6.699
LINC00857	-3.30014	4.7706	-38.0308	1.06809e-208	5.05954e-207	467.006	downregulate	6.054	2.754
FAM171A1	-3.16585	9.78536	-38.0145	1.41652e-208	6.63698e-207	466.724	downregulate	11.017	7.851
MYH11	-5.82438	11.898	-37.9937	2.03029e-208	9.49205e-207	466.365	downregulate	14.163	8.339
NWD1	-5.25754	4.54733	-37.9782	2.65498e-208	1.23589e-206	466.097	downregulate	6.592	1.334
TNFSF10	-3.39108	11.0771	-37.9531	4.10328e-208	1.90594e-206	465.662	downregulate	12.396	9.005
MACC1	-4.64598	7.68622	-37.9332	5.7959e-208	2.68057e-206	465.317	downregulate	9.493	4.847
STON2	-3.0887	7.85955	-37.864	1.92101e-207	8.80881e-206	464.119	downregulate	9.061	5.972
NDNF	-6.00331	6.65266	-37.8029	5.53314e-207	2.51576e-205	463.062	downregulate	8.987	2.984
TCEA3	-3.26476	10.2119	-37.7942	6.42898e-207	2.91691e-205	462.912	downregulate	11.482	8.217
ZBTB7C	-4.52665	8.02727	-37.792	6.68405e-207	3.02625e-205	462.873	downregulate	9.788	5.261
SCN2B	-4.72036	5.02634	-37.7637	1.0903e-206	4.90545e-205	462.384	downregulate	6.862	2.142
TMEM25	-3.17086	8.98516	-37.7608	1.14829e-206	5.15555e-205	462.333	downregulate	10.218	7.047
PDK4	-4.26724	11.6227	-37.7585	1.19372e-206	5.34836e-205	462.294	downregulate	13.282	9.015
RP3-325F22.5	-3.61446	4.05827	-37.7528	1.31879e-206	5.89644e-205	462.194	downregulate	5.464	1.849
CFAP221	-5.62062	4.45537	-37.7266	2.07539e-206	9.26005e-205	461.741	downregulate	6.641	1.021
ADAMTS9-AS1	-5.65483	5.22217	-37.7067	2.92787e-206	1.30097e-204	461.397	downregulate	7.421	1.766
DACH1	-4.59607	6.81126	-37.699	3.35018e-206	1.48555e-204	461.263	downregulate	8.599	4.003
THSD7B	-4.03838	4.47998	-37.6199	1.3178e-205	5.78381e-204	459.894	downregulate	6.05	2.012
EHF	-6.26556	8.13507	-37.6098	1.57078e-205	6.88007e-204	459.719	downregulate	10.572	4.306
SLC22A3	-4.58123	7.61885	-37.5987	1.90338e-205	8.31992e-204	459.527	downregulate	9.4	4.819
GPR110	-6.68753	5.69566	-37.5846	2.43162e-205	1.05433e-203	459.282	downregulate	8.296	1.609
IL1RL2	-3.56089	5.03784	-37.5679	3.24546e-205	1.40436e-203	458.994	downregulate	6.423	2.862
PDZRN4	-4.55219	5.04956	-37.5637	3.49193e-205	1.50798e-203	458.92	downregulate	6.82	2.268
TTC22	-4.91115	7.33622	-37.5117	8.5998e-205	3.69895e-203	458.02	downregulate	9.246	4.335
FAM95C	-4.10742	4.06369	-37.511	8.71245e-205	3.73992e-203	458.007	downregulate	5.661	1.554
KIF12	-5.82575	6.28997	-37.4881	1.29413e-204	5.54412e-203	457.612	downregulate	8.556	2.73
SRL	-3.65521	5.78575	-37.4822	1.43502e-204	6.12333e-203	457.508	downregulate	7.207	3.552
BTG2	-3.13995	12.4384	-37.4656	1.9125e-204	8.12849e-203	457.221	downregulate	13.66	10.52
LLGL2	-3.31895	10.2769	-37.4489	2.55463e-204	1.08149e-202	456.932	downregulate	11.568	8.249
KLHDC9	-3.97885	6.38405	-37.4423	2.86524e-204	1.2106e-202	456.817	downregulate	7.931	3.953
GRAMD1C	-3.0153	8.30926	-37.3877	7.37728e-204	3.0927e-202	455.872	downregulate	9.482	6.467
TEK	-3.32996	9.16228	-37.3781	8.71445e-204	3.63909e-202	455.706	downregulate	10.457	7.127
AK7	-3.232	6.20106	-37.3678	1.04172e-203	4.34171e-202	455.528	downregulate	7.458	4.226
PTPRN2	-3.40886	8.46965	-37.3663	1.0689e-203	4.44636e-202	455.502	downregulate	9.795	6.386
MISP	-6.76388	5.84348	-37.291	3.94684e-203	1.63232e-201	454.197	downregulate	8.474	1.71
LMOD1	-4.37042	9.95996	-37.2898	4.02886e-203	1.65986e-201	454.176	downregulate	11.66	7.289
PCSK5	-3.30012	8.29161	-37.2739	5.31168e-203	2.18419e-201	453.9	downregulate	9.575	6.275
FHL1	-4.13872	11.7083	-37.2556	7.29119e-203	2.99245e-201	453.583	downregulate	13.318	9.179
F3	-3.9503	9.53835	-37.176	2.90139e-202	1.17953e-200	452.203	downregulate	11.075	7.124
EPPK1	-5.32891	7.48297	-37.1726	3.08002e-202	1.24979e-200	452.144	downregulate	9.555	4.226
HID1	-3.37839	9.31326	-37.1714	3.14205e-202	1.27256e-200	452.124	downregulate	10.627	7.249
SCNN1B	-6.05716	7.70655	-37.134	6.00667e-202	2.42818e-200	451.476	downregulate	10.062	4.005
FAM83F	-5.64232	6.99039	-37.0856	1.39194e-201	5.59535e-200	450.636	downregulate	9.185	3.542
PTPRD	-4.2268	7.50497	-37.0813	1.50062e-201	6.02094e-200	450.561	downregulate	9.149	4.922
FAM47E	-3.19554	6.41367	-36.9516	1.42234e-200	5.65411e-199	448.314	downregulate	7.656	4.461
KRT18	-4.54059	11.9916	-36.9437	1.63403e-200	6.48368e-199	448.175	downregulate	13.757	9.217
BRINP1	-4.45882	4.43976	-36.9143	2.72107e-200	1.07375e-198	447.666	downregulate	6.174	1.715
CACNB2	-3.23524	6.05171	-36.9088	2.99329e-200	1.17685e-198	447.571	downregulate	7.31	4.075
TMEM37	-3.57592	9.26894	-36.9024	3.34342e-200	1.31211e-198	447.46	downregulate	10.66	7.084
LRIG1	-3.12908	10.8542	-36.8979	3.61471e-200	1.41599e-198	447.382	downregulate	12.071	8.942
EPHA1	-3.85618	7.7076	-36.8533	7.84041e-200	3.06018e-198	446.608	downregulate	9.207	5.351
SLC44A4	-6.21227	7.96499	-36.8327	1.12146e-199	4.36131e-198	446.251	downregulate	10.381	4.169
LAMC2	-5.17535	9.25526	-36.8171	1.46996e-199	5.68578e-198	445.98	downregulate	11.268	6.093
COL4A6	-5.29226	6.43137	-36.7806	2.77079e-199	1.0679e-197	445.347	downregulate	8.489	3.197
LINGO4	-3.42322	3.47906	-36.7525	4.51075e-199	1.73229e-197	444.86	downregulate	4.81	1.387
EDN2	-4.55296	4.20296	-36.7101	9.41352e-199	3.58314e-197	444.125	downregulate	5.974	1.421
C1ORF186	-4.09421	5.43645	-36.6627	2.1451e-198	8.12193e-197	443.302	downregulate	7.029	2.934
DNAH5	-4.81804	5.7895	-36.6079	5.54697e-198	2.09654e-196	442.353	downregulate	7.663	2.845
CTD-2554C21.3	-3.93991	4.53437	-36.5465	1.6104e-197	6.076e-196	441.288	downregulate	6.067	2.127
ZFP36	-3.10308	13.0468	-36.523	2.42378e-197	9.11291e-196	440.879	downregulate	14.254	11.151
RP13-514E23.1	-3.1746	3.20865	-36.503	3.43159e-197	1.28571e-195	440.532	downregulate	4.443	1.269
RP11-88H9.2	-3.00265	2.92552	-36.5018	3.50381e-197	1.31049e-195	440.511	downregulate	4.093	1.091
EPN3	-6.02617	6.11342	-36.4934	4.05329e-197	1.51337e-195	440.365	downregulate	8.457	2.431
DIO3OS	-4.06899	5.17275	-36.4771	5.37601e-197	2.00028e-195	440.083	downregulate	6.755	2.686
MPZL2	-3.60899	9.92143	-36.4665	6.46513e-197	2.40137e-195	439.899	downregulate	11.325	7.716
BCAM	-3.18688	12.194	-36.422	1.40086e-196	5.19428e-195	439.126	downregulate	13.433	10.246
RNF165	-3.65039	5.88134	-36.4162	1.54906e-196	5.72407e-195	439.026	downregulate	7.301	3.651
PLCXD3	-4.46599	6.00587	-36.3957	2.20977e-196	8.12365e-195	438.671	downregulate	7.743	3.277
VWA7	-3.23268	6.57785	-36.3768	3.06949e-196	1.12649e-194	438.342	downregulate	7.835	4.602
FAM160A1	-3.92294	6.5489	-36.3728	3.29076e-196	1.20359e-194	438.273	downregulate	8.074	4.152
TMEM139	-4.10704	7.55105	-36.3433	5.48856e-196	2.00063e-194	437.762	downregulate	9.148	5.041
NPY1R	-5.12509	6.78104	-36.3136	9.1988e-196	3.34171e-194	437.246	downregulate	8.774	3.649
RGS6	-4.08958	4.63188	-36.2966	1.23534e-195	4.47259e-194	436.951	downregulate	6.222	2.133
NTF3	-3.43145	4.62007	-36.1931	7.46286e-195	2.66605e-193	435.154	downregulate	5.955	2.523
ALS2CL	-3.09375	9.19853	-36.1898	7.90552e-195	2.8195e-193	435.096	downregulate	10.402	7.308
PPARG	-3.27841	8.86035	-36.1711	1.09445e-194	3.89689e-193	434.771	downregulate	10.135	6.857
MAATS1	-4.18539	6.15568	-36.1368	1.98526e-194	7.03376e-193	434.176	downregulate	7.783	3.598
SLC40A1	-3.15526	11.8108	-36.1172	2.79008e-194	9.86898e-193	433.836	downregulate	13.038	9.883
RERG	-4.08569	8.06955	-36.1028	3.58466e-194	1.26587e-192	433.586	downregulate	9.658	5.573
ATP1A2	-5.59047	7.02642	-36.0837	4.99584e-194	1.7527e-192	433.254	downregulate	9.2	3.61
CA3	-4.72464	5.41306	-36.0821	5.1297e-194	1.79673e-192	433.228	downregulate	7.25	2.526
DEGS2	-4.43562	7.05628	-35.9654	3.90101e-193	1.34018e-191	431.201	downregulate	8.781	4.346
ABCC6P2	-3.91995	3.81525	-35.9377	6.30475e-193	2.16252e-191	430.721	downregulate	5.34	1.42
TACC2	-3.08716	10.7633	-35.9311	7.07453e-193	2.42269e-191	430.606	downregulate	11.964	8.877
CMYA5	-4.14784	7.49565	-35.8835	1.61858e-192	5.49041e-191	429.779	downregulate	9.109	4.961
C9ORF152	-6.14519	4.92495	-35.7935	7.73086e-192	2.59781e-190	428.217	downregulate	7.315	1.17
SLC2A12	-4.47575	6.77342	-35.7851	8.94301e-192	3.00044e-190	428.071	downregulate	8.514	4.038
PARM1	-4.03147	10.5495	-35.7298	2.3384e-191	7.82109e-190	427.111	downregulate	12.117	8.086
TCF21	-6.80934	5.54081	-35.7272	2.44817e-191	8.17552e-190	427.065	downregulate	8.189	1.38
CNKSR1	-3.84522	7.79319	-35.7177	2.88515e-191	9.61984e-190	426.901	downregulate	9.289	5.443
GABRE	-3.79124	7.09226	-35.6708	6.52234e-191	2.16132e-189	426.086	downregulate	8.567	4.775
CCDC64B	-5.49346	6.41892	-35.6098	1.88377e-190	6.18509e-189	425.026	downregulate	8.555	3.062
EPB41L4A	-2.93976	8.60132	-35.5814	3.08347e-190	1.0078e-188	424.534	downregulate	9.745	6.805
PPP1R14A	-3.65919	7.45887	-35.5781	3.26924e-190	1.06689e-188	424.475	downregulate	8.882	5.223
WSCD2	-4.95696	5.23828	-35.5553	4.85227e-190	1.5811e-188	424.081	downregulate	7.166	2.209
PAMR1	-3.41844	8.16075	-35.5519	5.15645e-190	1.67768e-188	424.02	downregulate	9.49	6.072
TPTEP1	-3.78254	7.65345	-35.4587	2.60573e-189	8.364e-188	422.401	downregulate	9.124	5.342
CTB-51J22.1	-3.29572	3.58557	-35.4548	2.78794e-189	8.93554e-188	422.334	downregulate	4.867	1.572
MECOM	-3.77468	9.40033	-35.433	4.07029e-189	1.30068e-187	421.955	downregulate	10.868	7.094
GNA14	-3.2986	7.37122	-35.2588	8.41306e-188	2.65295e-186	418.929	downregulate	8.654	5.355
SLC16A12	-5.44832	5.39666	-35.2466	1.03914e-187	3.27201e-186	418.718	downregulate	7.515	2.067
KCNMB2	-4.05169	3.87653	-35.2458	1.05455e-187	3.31566e-186	418.704	downregulate	5.452	1.4
SUSD4	-4.3085	7.01938	-35.2435	1.0981e-187	3.44755e-186	418.663	downregulate	8.695	4.386
SLC9A2	-5.82537	4.91023	-35.1902	2.77011e-187	8.67161e-186	417.739	downregulate	7.176	1.35
CSDC2	-4.8667	5.39922	-35.1445	6.13257e-187	1.91418e-185	416.944	downregulate	7.292	2.425
KITLG	-3.27865	9.68024	-35.1221	9.06137e-187	2.82426e-185	416.554	downregulate	10.955	7.677
C2CD4A	-3.88898	3.62826	-35.0861	1.69297e-186	5.26142e-185	415.93	downregulate	5.141	1.252
KCNB1	-4.25338	5.95479	-35.0856	1.70695e-186	5.29722e-185	415.922	downregulate	7.609	3.355
CCBE1	-4.27214	6.4274	-35.0745	2.07109e-186	6.41798e-185	415.728	downregulate	8.089	3.817
ATF3	-3.32507	10.9453	-35.0627	2.54302e-186	7.83526e-185	415.523	downregulate	12.238	8.913
PEG3	-4.18499	7.80251	-35.0564	2.83961e-186	8.73658e-185	415.413	downregulate	9.43	5.245
C1ORF115	-3.09107	10.5363	-35.0505	3.14498e-186	9.63474e-185	415.311	downregulate	11.738	8.647
BMP2	-4.02251	8.17601	-35.0344	4.15972e-186	1.27253e-184	415.032	downregulate	9.74	5.718
HRASLS2	-3.92488	3.64161	-34.9673	1.33594e-185	4.0695e-184	413.866	downregulate	5.168	1.243
RRAD	-4.50007	7.31601	-34.9327	2.43978e-185	7.41102e-184	413.264	downregulate	9.066	4.566
TDGF1	-4.61346	3.90641	-34.9212	2.97725e-185	9.03086e-184	413.065	downregulate	5.701	1.087
MKX	-4.01063	4.4658	-34.8513	1.00397e-184	3.02401e-183	411.851	downregulate	6.025	2.015
GHR	-3.9594	8.55967	-34.8409	1.20381e-184	3.61076e-183	411.669	downregulate	10.099	6.14
FA2H	-4.82892	5.99936	-34.8348	1.33807e-184	4.00786e-183	411.564	downregulate	7.877	3.048
KRT8P3	-3.33626	2.97314	-34.8325	1.39293e-184	4.1664e-183	411.523	downregulate	4.271	0.934
KBTBD12	-4.13162	3.66455	-34.8282	1.49968e-184	4.46706e-183	411.45	downregulate	5.271	1.14
P2RY2	-3.64197	6.40203	-34.8267	1.54007e-184	4.58102e-183	411.423	downregulate	7.818	4.176
ECM2	-3.25931	8.60255	-34.7853	3.16308e-184	9.36988e-183	410.704	downregulate	9.87	6.611
BMP5	-5.46382	4.79113	-34.7607	4.85281e-184	1.43358e-182	410.276	downregulate	6.916	1.452
OCIAD2	-3.07472	9.60024	-34.7168	1.04127e-183	3.05923e-182	409.513	downregulate	10.796	7.721
TNXB	-3.85737	10.878	-34.7082	1.20948e-183	3.54857e-182	409.364	downregulate	12.378	8.521
S100A14	-6.46544	8.20444	-34.7011	1.36625e-183	3.99764e-182	409.242	downregulate	10.719	4.253
CFTR	-5.76095	5.41163	-34.7007	1.37802e-183	4.02659e-182	409.233	downregulate	7.652	1.891
TACSTD2	-6.24091	9.60941	-34.683	1.87215e-183	5.45563e-182	408.927	downregulate	12.036	5.796
F10	-3.64064	7.27192	-34.6786	2.02233e-183	5.88528e-182	408.85	downregulate	8.688	5.047
TC2N	-3.66442	9.57855	-34.678	2.04361e-183	5.93917e-182	408.84	downregulate	11.004	7.339
PRR15	-5.00037	5.9467	-34.671	2.30907e-183	6.70161e-182	408.718	downregulate	7.891	2.891
NOS1	-5.01633	4.93815	-34.6458	3.57791e-183	1.03562e-181	408.28	downregulate	6.889	1.873
GLS2	-4.11145	6.09269	-34.6167	5.93291e-183	1.71037e-181	407.775	downregulate	7.692	3.58
MFAP4	-4.2032	10.9834	-34.6022	7.63074e-183	2.19394e-181	407.523	downregulate	12.618	8.415
RP11-164P12.5	-3.2533	5.6463	-34.5935	8.88369e-183	2.55077e-181	407.371	downregulate	6.911	3.658
TRHDE	-5.15141	5.5342	-34.5925	9.03419e-183	2.59053e-181	407.355	downregulate	7.538	2.386
FOLR1	-7.03629	6.20508	-34.5643	1.4748e-182	4.22332e-181	406.865	downregulate	8.941	1.905
F2RL1	-4.08321	8.43167	-34.5613	1.55372e-182	4.4375e-181	406.813	downregulate	10.02	5.936
CEBPA-AS1	-2.98625	6.10339	-34.4917	5.20915e-182	1.47599e-180	405.604	downregulate	7.265	4.278
C6ORF132	-4.63966	8.20923	-34.4631	8.57052e-182	2.4157e-180	405.107	downregulate	10.014	5.374
POF1B	-5.57803	5.9173	-34.4625	8.65747e-182	2.43701e-180	405.097	downregulate	8.087	2.508
CES4A	-3.14619	6.30114	-34.4446	1.18234e-181	3.31951e-180	404.785	downregulate	7.525	4.378
TMEM132C	-4.98444	4.94543	-34.4291	1.54909e-181	4.33782e-180	404.515	downregulate	6.884	1.899
KCNK3	-4.72911	6.89359	-34.429	1.55109e-181	4.33782e-180	404.514	downregulate	8.733	4.004
KSR2	-4.38409	4.86762	-34.3633	4.86073e-181	1.35233e-179	403.373	downregulate	6.573	2.188
EPS8L2	-3.55427	10.7253	-34.3492	6.2087e-181	1.72289e-179	403.128	downregulate	12.108	8.553
SLC1A1	-3.67491	8.97763	-34.3201	1.03063e-180	2.84894e-179	402.622	downregulate	10.407	6.732
RP11-89H19.2	-3.36888	4.04591	-34.3167	1.09304e-180	3.01759e-179	402.563	downregulate	5.356	1.987
LDHD	-3.33905	8.85229	-34.2975	1.52519e-180	4.18911e-179	402.23	downregulate	10.151	6.812
ST14	-3.91175	10.8022	-34.2796	2.08157e-180	5.6882e-179	401.919	downregulate	12.323	8.412
LIMCH1	-3.67669	10.7192	-34.2645	2.70726e-180	7.38861e-179	401.657	downregulate	12.149	8.472
GYLTL1B	-4.51509	6.97498	-34.2566	3.10774e-180	8.46013e-179	401.519	downregulate	8.731	4.216
KLB	-4.72655	5.00916	-34.2373	4.3443e-180	1.18114e-178	401.184	downregulate	6.847	2.121
PREX2	-2.99098	8.18868	-34.2343	4.57688e-180	1.24281e-178	401.132	downregulate	9.352	6.361
SH2D3A	-3.56399	7.71333	-34.2317	4.79224e-180	1.29965e-178	401.086	downregulate	9.099	5.535
TMC5	-5.80781	6.14108	-34.1623	1.60167e-179	4.30568e-178	399.881	downregulate	8.4	2.592
ENPP5	-4.51226	7.77159	-34.1173	3.5e-179	9.36206e-178	399.1	downregulate	9.526	5.014
FERMT1	-4.99994	6.55005	-34.1082	4.09694e-179	1.09452e-177	398.942	downregulate	8.494	3.495
MPV17L	-3.45208	7.79921	-34.0626	9.05204e-179	2.40337e-177	398.15	downregulate	9.142	5.69
SCUBE1	-4.22149	6.81591	-34.0336	1.50048e-178	3.96428e-177	397.645	downregulate	8.458	4.236
MYRIP	-3.47998	7.08269	-34.0316	1.55256e-178	4.09684e-177	397.611	downregulate	8.436	4.956
LYVE1	-3.85356	8.61773	-34.0203	1.89025e-178	4.96979e-177	397.414	downregulate	10.116	6.263
CYP4B1	-6.85163	6.01996	-34.0102	2.25332e-178	5.90975e-177	397.239	downregulate	8.684	1.833
RP4-755D9.1	-4.36743	4.01137	-33.9712	4.44073e-178	1.1562e-176	396.561	downregulate	5.71	1.342
ABAT	-3.48682	9.80812	-33.9672	4.76054e-178	1.23797e-176	396.492	downregulate	11.164	7.677
SLC38A4	-5.22771	5.16584	-33.9661	4.84895e-178	1.25944e-176	396.473	downregulate	7.199	1.971
CLSTN2	-4.32347	7.918	-33.9072	1.35009e-177	3.4898e-176	395.45	downregulate	9.599	5.276
INMT	-4.10528	8.5741	-33.9037	1.43532e-177	3.70563e-176	395.389	downregulate	10.171	6.065
TMEM178A	-3.36323	6.48156	-33.8902	1.81365e-177	4.67118e-176	395.155	downregulate	7.789	4.426
ATP2C2	-5.1611	6.60102	-33.8805	2.1455e-177	5.51927e-176	394.987	downregulate	8.608	3.447
VWA2	-4.60284	5.06628	-33.8793	2.1926e-177	5.6337e-176	394.966	downregulate	6.856	2.253
HHIP	-5.39127	5.6977	-33.8415	4.22724e-177	1.07842e-175	394.31	downregulate	7.794	2.403
MASP1	-4.7946	7.35536	-33.8302	5.14824e-177	1.31027e-175	394.113	downregulate	9.22	4.425
CA4	-5.6407	6.3066	-33.8279	5.3535e-177	1.3609e-175	394.074	downregulate	8.5	2.86
PRDM6	-3.57089	5.8103	-33.82	6.14652e-177	1.55697e-175	393.936	downregulate	7.199	3.628
SOWAHA	-4.72307	5.25329	-33.8139	6.83678e-177	1.72979e-175	393.829	downregulate	7.09	2.367
FAM13C	-3.12793	7.46557	-33.8028	8.2931e-177	2.095e-175	393.636	downregulate	8.682	5.554
AOX1	-4.33276	9.2549	-33.8027	8.29973e-177	2.095e-175	393.636	downregulate	10.94	6.607
TMEM35	-4.62247	4.72152	-33.787	1.09161e-176	2.75219e-175	393.362	downregulate	6.519	1.897
SLC5A1	-5.96305	5.92217	-33.7847	1.13513e-176	2.85857e-175	393.323	downregulate	8.241	2.278
EFEMP1	-3.466	11.1909	-33.7794	1.24414e-176	3.12942e-175	393.231	downregulate	12.539	9.073
DEFB1	-6.38252	6.42489	-33.768	1.5174e-176	3.79898e-175	393.033	downregulate	8.907	2.524
DCN	-3.47437	13.4842	-33.6935	5.53536e-176	1.37941e-174	391.74	downregulate	14.835	11.361
MMP24	-3.45063	6.69026	-33.6619	9.59409e-176	2.37434e-174	391.19	downregulate	8.032	4.582
CLIC6	-3.92379	7.95821	-33.6459	1.26741e-175	3.12579e-174	390.912	downregulate	9.484	5.56
SLC27A2	-4.80065	7.13288	-33.6327	1.59246e-175	3.91848e-174	390.684	downregulate	9	4.199
GPX3	-4.20818	13.2811	-33.6242	1.84791e-175	4.54185e-174	390.535	downregulate	14.918	10.709
PLS1	-3.9963	8.64995	-33.5973	2.94728e-175	7.23563e-174	390.069	downregulate	10.204	6.208
RSPO3	-3.57349	6.94226	-33.5873	3.50849e-175	8.5938e-174	389.895	downregulate	8.332	4.758
NTRK3	-3.65428	6.57578	-33.5778	4.1379e-175	1.0124e-173	389.73	downregulate	7.997	4.343
GOLT1A	-4.65424	5.3162	-33.5556	6.08223e-175	1.48473e-173	389.345	downregulate	7.126	2.472
ENTPD3	-4.53287	5.86297	-33.5531	6.36079e-175	1.55097e-173	389.3	downregulate	7.626	3.093
POU2F3	-4.27697	4.86432	-33.5281	9.82169e-175	2.38673e-173	388.866	downregulate	6.528	2.251
LINC00982	-5.0708	5.22157	-33.5209	1.11298e-174	2.69851e-173	388.741	downregulate	7.194	2.123
LIN7A	-3.5246	7.64944	-33.4825	2.16724e-174	5.22518e-173	388.075	downregulate	9.02	5.496
OXGR1	-4.12442	3.77233	-33.446	4.08419e-174	9.81881e-173	387.442	downregulate	5.376	1.252
LINC01123	-3.47297	7.01115	-33.4455	4.12387e-174	9.89821e-173	387.433	downregulate	8.362	4.889
C1ORF132	-3.36618	6.68508	-33.4449	4.16685e-174	9.99021e-173	387.422	downregulate	7.994	4.628
ESRRG	-4.96081	6.36625	-33.3733	1.44489e-173	3.43356e-172	386.18	downregulate	8.295	3.335
C19ORF33	-5.50596	6.51187	-33.3317	2.97825e-173	7.06176e-172	385.457	downregulate	8.653	3.147
MESTIT1	-2.99123	3.02444	-33.3142	4.03726e-173	9.55174e-172	385.153	downregulate	4.188	1.196
RASD1	-3.65638	9.55078	-33.292	5.93947e-173	1.40213e-171	384.767	downregulate	10.973	7.316
PRSS22	-4.86034	5.58943	-33.2715	8.47903e-173	1.99508e-171	384.412	downregulate	7.48	2.619
EPHA7	-5.16542	5.04039	-33.2638	9.68885e-173	2.27725e-171	384.279	downregulate	7.049	1.884
BHMT2	-5.06449	7.55437	-33.2448	1.34744e-172	3.15322e-171	383.949	downregulate	9.524	4.459
ALDH1L1	-5.44219	7.92866	-33.243	1.39117e-172	3.252e-171	383.917	downregulate	10.045	4.603
IL1RL1	-4.72757	5.74868	-33.2132	2.33256e-172	5.42314e-171	383.401	downregulate	7.587	2.86
RP11-465N4.4	-3.03719	3.94731	-33.1232	1.11353e-171	2.57225e-170	381.839	downregulate	5.128	2.091
CLDN5	-3.15471	9.39965	-33.092	1.9145e-171	4.38947e-170	381.298	downregulate	10.626	7.472
FGF10	-4.48144	4.58447	-33.0718	2.71796e-171	6.22498e-170	380.947	downregulate	6.327	1.846
CXADR	-4.03888	9.43181	-33.0332	5.31699e-171	1.21646e-169	380.277	downregulate	11.002	6.964
LIFR-AS1	-3.53574	5.62519	-33.0175	6.98556e-171	1.59651e-169	380.004	downregulate	7	3.464
B3GALT5	-5.22329	5.30861	-32.9976	9.87128e-171	2.25363e-169	379.659	downregulate	7.34	2.117
CPE	-3.10963	11.002	-32.9837	1.25694e-170	2.86658e-169	379.417	downregulate	12.211	9.102
USP43	-3.89701	6.57976	-32.9702	1.58833e-170	3.61849e-169	379.184	downregulate	8.095	4.198
TRABD2B	-3.61589	6.8671	-32.9367	2.84288e-170	6.42217e-169	378.602	downregulate	8.273	4.657
MFSD4	-4.35608	7.958	-32.9091	4.5888e-170	1.03445e-168	378.124	downregulate	9.652	5.296
RP5-1033H22.2	-3.3854	3.01668	-32.8992	5.45039e-170	1.22483e-168	377.952	downregulate	4.333	0.948
BCO1	-3.56898	3.87568	-32.8759	8.16933e-170	1.83201e-168	377.547	downregulate	5.264	1.695
DNASE1L3	-4.25849	7.543	-32.8543	1.18853e-169	2.65978e-168	377.173	downregulate	9.199	4.941
GLIS3	-3.31217	8.15026	-32.8466	1.35719e-169	3.02778e-168	377.04	downregulate	9.438	6.126
MMRN1	-4.08173	8.04966	-32.8221	2.07626e-169	4.6128e-168	376.615	downregulate	9.637	5.555
SBSPON	-3.67477	7.59619	-32.7887	3.71074e-169	8.21021e-168	376.035	downregulate	9.025	5.35
ENPP3	-3.52432	5.69889	-32.7849	3.9628e-169	8.75888e-168	375.97	downregulate	7.069	3.545
SNCAIP	-3.22456	6.37788	-32.7791	4.38121e-169	9.66383e-168	375.869	downregulate	7.632	4.407
IQCA1	-4.18263	6.12368	-32.7653	5.56835e-169	1.22572e-167	375.63	downregulate	7.75	3.568
TMEM56	-3.5845	8.81627	-32.7626	5.83541e-169	1.28188e-167	375.583	downregulate	10.21	6.626
PPL	-4.18684	10.7012	-32.7524	6.97257e-169	1.53012e-167	375.405	downregulate	12.329	8.143
RP11-677M14.3	-3.17578	3.90916	-32.727	1.08213e-168	2.36988e-167	374.966	downregulate	5.144	1.968
EDAR	-4.03165	4.10038	-32.7132	1.3758e-168	3.0069e-167	374.726	downregulate	5.668	1.637
FOXQ1	-4.81318	4.45025	-32.7103	1.4472e-168	3.15973e-167	374.675	downregulate	6.322	1.509
EPHX2	-3.03288	10.3514	-32.669	2.9651e-168	6.46074e-167	373.959	downregulate	11.531	8.498
TMEM100	-4.7357	6.54816	-32.6441	4.56831e-168	9.91384e-167	373.527	downregulate	8.39	3.654
PRSS16	-4.4638	6.95052	-32.6097	8.29834e-168	1.79903e-166	372.931	downregulate	8.686	4.223
WWC1	-3.70362	10.0556	-32.5739	1.5424e-167	3.33374e-166	372.311	downregulate	11.496	7.792
COBL	-3.98975	9.58085	-32.5684	1.69941e-167	3.66574e-166	372.214	downregulate	11.132	7.143
HMCN2	-3.89597	6.99588	-32.5456	2.52179e-167	5.42879e-166	371.82	downregulate	8.511	4.615
KL	-4.34687	7.12963	-32.5418	2.69624e-167	5.79854e-166	371.753	downregulate	8.82	4.473
TTC9	-3.27656	8.19233	-32.5138	4.38243e-167	9.40605e-166	371.268	downregulate	9.467	6.19
RP11-747H7.3	-3.56072	5.72593	-32.5029	5.29114e-167	1.13225e-165	371.08	downregulate	7.111	3.55
PRRG4	-3.07306	9.41783	-32.4986	5.70063e-167	1.21867e-165	371.005	downregulate	10.613	7.54
FCER1A	-3.55435	6.04233	-32.4665	9.94843e-167	2.12043e-165	370.449	downregulate	7.425	3.87
XK	-3.53393	6.37991	-32.4583	1.14698e-166	2.44227e-165	370.307	downregulate	7.754	4.22
PALMD	-3.06073	9.40297	-32.4499	1.3271e-166	2.82301e-165	370.161	downregulate	10.593	7.533
ANXA3	-4.24583	9.41438	-32.4417	1.53011e-166	3.24842e-165	370.019	downregulate	11.066	6.82
SCARA3	-3.27089	9.68972	-32.4354	1.70575e-166	3.61417e-165	369.91	downregulate	10.962	7.691
HSD11B2	-4.74199	8.34619	-32.4267	1.98601e-166	4.20385e-165	369.758	downregulate	10.19	5.448
ABCC8	-4.25577	3.92799	-32.3902	3.73726e-166	7.87977e-165	369.127	downregulate	5.583	1.327
RP11-532F12.5	-4.20642	6.32828	-32.3579	6.55162e-166	1.37597e-164	368.566	downregulate	7.964	3.758
C9ORF24	-3.95193	3.79035	-32.3462	8.02585e-166	1.68066e-164	368.363	downregulate	5.327	1.375
RP11-1069G10.1	-3.55651	3.79689	-32.326	1.1384e-165	2.38156e-164	368.014	downregulate	5.18	1.623
GRB14	-4.0836	5.86629	-32.2679	3.121e-165	6.51021e-164	367.006	downregulate	7.454	3.371
NEXN	-3.28524	8.67207	-32.2638	3.34898e-165	6.979e-164	366.936	downregulate	9.95	6.664
MAP6	-3.37615	7.46277	-32.2261	6.43629e-165	1.33738e-163	366.283	downregulate	8.776	5.4
RP11-54O7.3	-3.19191	5.39849	-32.1998	1.01638e-164	2.10378e-163	365.826	downregulate	6.64	3.448
SLC4A4	-4.41831	9.24248	-32.1863	1.28346e-164	2.6515e-163	365.593	downregulate	10.961	6.542
AC005083.1	-3.39677	4.72199	-32.1797	1.43919e-164	2.97036e-163	365.479	downregulate	6.043	2.646
FOXP2	-3.33298	7.50877	-32.175	1.56046e-164	3.21758e-163	365.398	downregulate	8.805	5.472
HHIP-AS1	-3.48257	4.43661	-32.1633	1.91169e-164	3.93425e-163	365.195	downregulate	5.791	2.308
EYA2	-3.6054	7.79004	-32.1526	2.30397e-164	4.72797e-163	365.009	downregulate	9.192	5.587
HBB	-4.62172	9.8128	-32.0802	8.08232e-164	1.64757e-162	363.755	downregulate	11.61	6.988
SLC34A2	-7.63315	6.79284	-32.0734	9.0954e-164	1.85233e-162	363.637	downregulate	9.761	2.128
PCP4L1	-4.44527	4.69417	-32.0657	1.03901e-163	2.11199e-162	363.504	downregulate	6.423	1.978
RP11-800A3.4	-3.87423	6.18968	-32.0426	1.55115e-163	3.14411e-162	363.104	downregulate	7.696	3.822
ZNF711	-3.689	6.80877	-32.0287	1.97279e-163	3.99499e-162	362.863	downregulate	8.243	4.554
CTD-2554C21.2	-3.34083	3.90422	-32.0009	3.19103e-163	6.44379e-162	362.383	downregulate	5.203	1.863
FHL5	-3.63336	5.892	-31.9875	4.02506e-163	8.12035e-162	362.151	downregulate	7.305	3.672
SMAD9	-3.0591	8.32048	-31.9607	6.40571e-163	1.28869e-161	361.687	downregulate	9.51	6.451
ATAD3C	-3.0424	6.77409	-31.9596	6.53551e-163	1.31358e-161	361.667	downregulate	7.957	4.915
MUC1	-4.88089	10.0051	-31.88	2.59444e-162	5.1855e-161	360.289	downregulate	11.903	7.022
KCNJ16	-6.66652	5.58747	-31.8321	5.94888e-162	1.18023e-160	359.46	downregulate	8.18	1.513
DPP4	-3.74317	9.18035	-31.7881	1.27587e-161	2.52427e-160	358.698	downregulate	10.636	6.893
MUM1L1	-4.57217	4.90772	-31.7765	1.55814e-161	3.0799e-160	358.498	downregulate	6.686	2.114
MLXIPL	-4.31777	6.57685	-31.7193	4.19675e-161	8.25003e-160	357.508	downregulate	8.256	3.938
DLGAP2	-3.04744	3.65177	-31.7145	4.55838e-161	8.93642e-160	357.426	downregulate	4.837	1.789
GCOM1	-4.35616	5.29927	-31.7123	4.74312e-161	9.29012e-160	357.386	downregulate	6.993	2.637
MRVI1	-2.98733	9.18724	-31.7108	4.8629e-161	9.51606e-160	357.361	downregulate	10.349	7.362
MKRN2OS	-3.194	3.56648	-31.7032	5.54489e-161	1.08211e-159	357.23	downregulate	4.809	1.615
PKHD1L1	-4.74735	5.1565	-31.7025	5.61091e-161	1.094e-159	357.218	downregulate	7.003	2.255
FILIP1	-2.96884	7.90177	-31.6461	1.49064e-160	2.88549e-159	356.242	downregulate	9.056	6.087
C2CD4B	-3.57072	5.14805	-31.5451	8.57297e-160	1.6403e-158	354.494	downregulate	6.537	2.966
MAOB	-4.00349	10.339	-31.4728	2.99359e-159	5.69231e-158	353.245	downregulate	11.896	7.892
ENTPD2	-4.02419	5.87657	-31.4524	4.263e-159	8.09894e-158	352.892	downregulate	7.442	3.417
SYT7	-3.37305	8.6776	-31.4454	4.81253e-159	9.12684e-158	352.771	downregulate	9.989	6.616
TOX3	-5.28789	5.70262	-31.4011	1.03573e-158	1.95733e-157	352.005	downregulate	7.759	2.471
SLC24A3	-3.81839	7.72915	-31.3385	3.05623e-158	5.7454e-157	350.924	downregulate	9.214	5.396
AC009299.3	-3.90497	4.82851	-31.3265	3.76563e-158	7.06048e-157	350.715	downregulate	6.347	2.442
RSPH1	-3.60713	5.9215	-31.2849	7.72872e-158	1.44534e-156	349.997	downregulate	7.324	3.717
TFPI	-2.98549	10.329	-31.2813	8.22613e-158	1.53702e-156	349.935	downregulate	11.49	8.504
C7	-5.05642	10.7346	-31.2728	9.52837e-158	1.77879e-156	349.788	downregulate	12.701	7.645
SHISA6	-3.92193	4.92039	-31.2524	1.35527e-157	2.52132e-156	349.436	downregulate	6.446	2.524
ADRA1A	-4.16776	3.98393	-31.2476	1.47213e-157	2.73635e-156	349.353	downregulate	5.605	1.437
ATP1B1	-3.0656	12.8776	-31.2421	1.61963e-157	3.00792e-156	349.258	downregulate	14.07	11.004
PGM5-AS1	-4.08691	3.47117	-31.1813	4.63463e-157	8.56292e-156	348.207	downregulate	5.061	0.974
IGSF9	-4.36514	6.54725	-31.1735	5.30337e-157	9.79007e-156	348.073	downregulate	8.245	3.88
DSP	-4.7381	11.5934	-31.1699	5.64327e-157	1.04086e-155	348.011	downregulate	13.436	8.698
C1ORF116	-5.30146	8.68599	-31.16	6.69869e-157	1.23447e-155	347.839	downregulate	10.748	5.446
LSR	-2.98955	10.7222	-31.1498	7.99376e-157	1.46809e-155	347.663	downregulate	11.885	8.895
CMBL	-3.72326	9.90773	-31.1299	1.1279e-156	2.06969e-155	347.319	downregulate	11.356	7.632
CES1	-5.33637	9.51964	-31.107	1.67485e-156	3.06808e-155	346.924	downregulate	11.595	6.259
KANK4	-4.1613	5.34736	-31.0523	4.30976e-156	7.84807e-155	345.98	downregulate	6.966	2.804
C6	-5.1528	5.43511	-31.0444	4.94179e-156	8.99138e-155	345.843	downregulate	7.439	2.286
KCNT2	-3.30889	5.45965	-31.0259	6.80462e-156	1.2339e-154	345.523	downregulate	6.746	3.438
CKMT2	-4.24619	5.95067	-31.0219	7.28961e-156	1.31962e-154	345.455	downregulate	7.602	3.356
MUSTN1	-3.91287	5.39255	-31.018	7.80205e-156	1.41119e-154	345.387	downregulate	6.914	3.001
RBP4	-6.3257	7.17116	-31.0177	7.8358e-156	1.41611e-154	345.382	downregulate	9.631	3.305
DSC2	-3.93693	9.40745	-31.0164	8.01258e-156	1.44684e-154	345.36	downregulate	10.938	7.002
SORBS2	-3.0354	10.7521	-30.9709	1.75926e-155	3.16607e-154	344.574	downregulate	11.933	8.897
CCDC178	-3.5152	4.1452	-30.9303	3.55078e-155	6.3583e-154	343.873	downregulate	5.512	1.997
CCL14	-3.89828	8.81529	-30.9053	5.46962e-155	9.76991e-154	343.441	downregulate	10.331	6.433
MALRD1	-3.47191	3.52103	-30.8971	6.29456e-155	1.12248e-153	343.301	downregulate	4.871	1.399
CASZ1	-2.98783	9.40322	-30.8672	1.05603e-154	1.88005e-153	342.784	downregulate	10.565	7.577
HSPB7	-4.48437	8.02558	-30.8132	2.68316e-154	4.73373e-153	341.852	downregulate	9.77	5.285
CLDN10	-5.43019	4.79	-30.7683	5.82361e-154	1.02239e-152	341.078	downregulate	6.902	1.472
STK33	-4.27566	5.65057	-30.7319	1.09067e-153	1.90855e-152	340.451	downregulate	7.313	3.038
KIAA1683	-2.9489	7.50927	-30.7295	1.13665e-153	1.98738e-152	340.41	downregulate	8.656	5.707
CGN	-3.71827	9.89828	-30.7202	1.33529e-153	2.33091e-152	340.249	downregulate	11.344	7.626
CDO1	-4.3386	7.0714	-30.7177	1.39363e-153	2.4288e-152	340.206	downregulate	8.759	4.42
SYNPO2	-3.75795	10.8045	-30.6879	2.33054e-153	4.04525e-152	339.693	downregulate	12.266	8.508
TMPRSS3	-4.04827	6.21733	-30.6756	2.88301e-153	4.99614e-152	339.48	downregulate	7.792	3.743
LRRN1	-3.79881	6.10123	-30.6245	6.96685e-153	1.19767e-151	338.599	downregulate	7.579	3.78
CXCL2	-4.40808	7.35172	-30.6153	8.16136e-153	1.39967e-151	338.441	downregulate	9.066	4.658
CTNNA3	-3.54411	4.07644	-30.599	1.08062e-152	1.84883e-151	338.16	downregulate	5.455	1.911
SLC1A7	-3.15423	4.6249	-30.558	2.195e-152	3.75244e-151	337.452	downregulate	5.852	2.697
PPP1R1A	-5.32829	7.06049	-30.5539	2.3524e-152	4.01832e-151	337.383	downregulate	9.133	3.804
DYNLRB2	-3.12334	3.94526	-30.5034	5.62426e-152	9.56168e-151	336.512	downregulate	5.16	2.037
RP11-903H12.5	-2.99269	9.09376	-30.4885	7.27181e-152	1.23334e-150	336.256	downregulate	10.258	7.265
TLL1	-3.16503	6.22505	-30.486	7.58914e-152	1.28615e-150	336.213	downregulate	7.456	4.291
SULT1A2	-4.15947	5.52529	-30.4121	2.71274e-151	4.5901e-150	334.94	downregulate	7.143	2.983
CNTNAP2	-3.9552	5.05327	-30.4028	3.18472e-151	5.38024e-150	334.78	downregulate	6.591	2.636
CSRNP3	-3.13102	6.8053	-30.3806	4.67522e-151	7.87972e-150	334.397	downregulate	8.023	4.892
C8ORF34	-3.87387	3.76034	-30.3592	6.75701e-151	1.13795e-149	334.029	downregulate	5.267	1.393
TRHDE-AS1	-4.50821	4.41564	-30.3215	1.29356e-150	2.1683e-149	333.38	downregulate	6.169	1.661
DNALI1	-3.48856	8.53917	-30.2886	2.27957e-150	3.81216e-149	332.814	downregulate	9.896	6.407
LINC00865	-3.23598	6.40832	-30.2878	2.3117e-150	3.8629e-149	332.8	downregulate	7.667	4.431
FGFR3	-3.99478	8.45822	-30.2741	2.92551e-150	4.88069e-149	332.565	downregulate	10.012	6.017
ACSS3	-3.69386	8.80212	-30.2741	2.9276e-150	4.88069e-149	332.564	downregulate	10.239	6.545
FAM83E	-5.19809	4.36639	-30.274	2.93368e-150	4.88704e-149	332.562	downregulate	6.388	1.19
CACNA2D3	-3.11324	5.52788	-30.2198	7.45543e-150	1.23431e-148	331.63	downregulate	6.739	3.625
ATP13A4	-5.1372	5.74193	-30.2022	1.01007e-149	1.66841e-148	331.327	downregulate	7.74	2.603
MIR143HG	-3.85297	5.66599	-30.1882	1.28632e-149	2.11657e-148	331.085	downregulate	7.164	3.311
PLA2G4F	-6.274	6.02203	-30.1602	2.08207e-149	3.4181e-148	330.604	downregulate	8.462	2.188
ERBB4	-5.21859	5.91128	-30.1565	2.22019e-149	3.64206e-148	330.54	downregulate	7.941	2.722
SCN3B	-3.13886	5.72838	-30.1047	5.41311e-149	8.82596e-148	329.65	downregulate	6.949	3.81
SMIM6	-4.63596	3.78508	-30.0887	7.12462e-149	1.16077e-147	329.375	downregulate	5.588	0.952
NIPAL1	-3.5417	7.39199	-30.0629	1.11241e-148	1.80418e-147	328.93	downregulate	8.769	5.228
RP11-279F6.1	-3.42522	4.2773	-30.0521	1.33848e-148	2.16921e-147	328.745	downregulate	5.609	2.184
RP11-231P20.2	-3.95151	3.49832	-30.0348	1.80293e-148	2.91313e-147	328.448	downregulate	5.035	1.084
KLF5	-3.7263	10.0046	-30.0118	2.68042e-148	4.31799e-147	328.051	downregulate	11.454	7.727
GSTA1	-6.6169	6.10431	-29.9958	3.52724e-148	5.6779e-147	327.777	downregulate	8.678	2.061
FOSB	-4.0026	11.5044	-29.9953	3.55602e-148	5.71995e-147	327.769	downregulate	13.061	9.058
LMO7	-3.00504	11.2224	-29.9528	7.3922e-148	1.18551e-146	327.038	downregulate	12.391	9.386
ABCC3	-3.35832	9.24107	-29.9186	1.33066e-147	2.12926e-146	326.451	downregulate	10.547	7.189
ABCB1	-3.19809	8.70885	-29.8989	1.8666e-147	2.98019e-146	326.113	downregulate	9.953	6.754
COL4A3	-4.73086	6.5634	-29.8892	2.20863e-147	3.52364e-146	325.945	downregulate	8.403	3.672
FNDC5	-3.16436	6.0402	-29.8877	2.26495e-147	3.60815e-146	325.919	downregulate	7.271	4.106
DACT2	-3.56429	6.0849	-29.8781	2.6728e-147	4.23903e-146	325.754	downregulate	7.471	3.907
C10ORF107	-3.56951	4.1224	-29.8133	8.13232e-147	1.28315e-145	324.642	downregulate	5.511	1.941
SLIT3	-3.14388	10.7585	-29.7855	1.31242e-146	2.06473e-145	324.164	downregulate	11.981	8.837
LINC01124	-2.9775	3.72448	-29.768	1.77209e-146	2.7818e-145	323.864	downregulate	4.882	1.905
PLEKHA6	-3.34116	9.76485	-29.7632	1.9247e-146	3.01696e-145	323.782	downregulate	11.064	7.723
SYT13	-5.20915	5.25169	-29.7174	4.2276e-146	6.58832e-145	322.996	downregulate	7.277	2.068
CAPN8	-5.08488	4.84579	-29.7131	4.55622e-146	7.0953e-145	322.921	downregulate	6.823	1.738
SGPP2	-3.93904	8.05913	-29.7128	4.5796e-146	7.12655e-145	322.916	downregulate	9.591	5.652
IGSF1	-3.95081	4.83994	-29.7124	4.61262e-146	7.17274e-145	322.909	downregulate	6.376	2.426
CADM2	-3.70048	4.55448	-29.6422	1.53877e-145	2.36715e-144	321.705	downregulate	5.994	2.293
BDKRB2	-2.96281	8.70369	-29.6197	2.2647e-145	3.48139e-144	321.319	downregulate	9.856	6.893
NRK	-4.64321	4.91705	-29.5953	3.44639e-145	5.29036e-144	320.9	downregulate	6.723	2.08
ZNF676	-3.16655	3.60359	-29.5464	7.98312e-145	1.22022e-143	320.06	downregulate	4.835	1.668
VIPR2	-3.55913	4.93173	-29.5445	8.23561e-145	1.25703e-143	320.029	downregulate	6.316	2.757
NOVA1	-3.51272	6.60647	-29.5322	1.01831e-144	1.55098e-143	319.817	downregulate	7.973	4.46
HSPB6	-3.81696	10.1562	-29.4995	1.78335e-144	2.6952e-143	319.258	downregulate	11.641	7.824
PYGM	-3.48736	6.60069	-29.481	2.45099e-144	3.69902e-143	318.94	downregulate	7.957	4.47
LYPD6B	-4.40446	5.13142	-29.4758	2.68098e-144	4.04328e-143	318.85	downregulate	6.844	2.44
GLP2R	-4.03241	3.57732	-29.4664	3.15108e-144	4.74892e-143	318.689	downregulate	5.145	1.113
GPR160	-3.04238	8.5358	-29.4619	3.40029e-144	5.11733e-143	318.613	downregulate	9.719	6.677
SLCO4C1	-4.9964	5.52585	-29.4562	3.75026e-144	5.63614e-143	318.515	downregulate	7.469	2.472
OMD	-3.72117	6.252	-29.4462	4.45395e-144	6.68901e-143	318.343	downregulate	7.699	3.978
ALOX12P2	-3.14499	3.93057	-29.4357	5.33199e-144	8.00207e-143	318.163	downregulate	5.154	2.009
GPD1	-5.43153	7.8464	-29.3777	1.44248e-143	2.15581e-142	317.169	downregulate	9.959	4.527
CYP3A5	-4.19564	6.78291	-29.3705	1.6314e-143	2.43476e-142	317.046	downregulate	8.415	4.219
CFAP46	-3.70245	4.34473	-29.3645	1.80751e-143	2.69012e-142	316.944	downregulate	5.785	2.082
MYO5B	-3.60114	10.1954	-29.3458	2.49283e-143	3.70753e-142	316.623	downregulate	11.596	7.995
FIBIN	-3.23167	7.88491	-29.3122	4.43394e-143	6.57629e-142	316.048	downregulate	9.142	5.91
PLA2R1	-3.25963	8.62052	-29.3094	4.65526e-143	6.89979e-142	315.999	downregulate	9.888	6.629
HIF3A	-4.10945	6.91956	-29.2651	9.93701e-143	1.46574e-141	315.241	downregulate	8.518	4.408
SLC14A1	-4.05819	6.93547	-29.2563	1.15517e-142	1.70158e-141	315.091	downregulate	8.514	4.455
ALDH1A2	-3.68522	7.70356	-29.2107	2.52466e-142	3.7087e-141	314.31	downregulate	9.137	5.451
SVEP1	-3.22084	9.5083	-29.1799	4.28067e-142	6.26259e-141	313.782	downregulate	10.761	7.54
RP3-523K23.2	-4.62504	4.67206	-29.1353	9.18794e-142	1.33601e-140	313.02	downregulate	6.471	1.846
MMP28	-3.62973	7.35538	-29.1101	1.41479e-141	2.05168e-140	312.588	downregulate	8.767	5.137
DIO3	-3.17326	4.03376	-29.108	1.46675e-141	2.1256e-140	312.552	downregulate	5.268	2.095
KCNQ1	-3.09903	9.41783	-29.1079	1.46952e-141	2.12818e-140	312.55	downregulate	10.623	7.524
FMO2	-4.43875	8.55444	-29.102	1.62608e-141	2.35174e-140	312.449	downregulate	10.281	5.842
SLC23A1	-4.27125	4.74428	-29.099	1.70991e-141	2.47132e-140	312.399	downregulate	6.405	2.134
PAPPA2	-3.98329	5.33498	-29.062	3.22607e-141	4.65637e-140	311.765	downregulate	6.884	2.901
MYLK	-2.95319	12.4486	-28.9852	1.19931e-140	1.71834e-139	310.453	downregulate	13.597	10.644
PNMT	-3.28643	3.33283	-28.9755	1.41727e-140	2.02794e-139	310.286	downregulate	4.611	1.324
CLDN2	-5.3761	5.07016	-28.9259	3.30811e-140	4.70531e-139	309.44	downregulate	7.161	1.785
C11ORF70	-3.15444	5.02666	-28.8707	8.50247e-140	1.20616e-138	308.497	downregulate	6.253	3.099
PDE1A	-3.30113	8.09893	-28.8413	1.40675e-139	1.99037e-138	307.994	downregulate	9.383	6.082
DSG2	-4.04919	10.7099	-28.8301	1.70253e-139	2.40569e-138	307.803	downregulate	12.285	8.235
DMGDH	-4.37809	6.50098	-28.8237	1.90192e-139	2.68566e-138	307.692	downregulate	8.204	3.825
RP11-276H19.2	-3.17192	3.24038	-28.8185	2.07737e-139	2.92957e-138	307.604	downregulate	4.474	1.302
CPED1	-3.21922	9.06269	-28.7777	4.17469e-139	5.86803e-138	306.907	downregulate	10.315	7.095
PLCXD2	-3.34638	4.92589	-28.7654	5.14778e-139	7.22638e-138	306.698	downregulate	6.227	2.881
FBP1	-3.74493	10.215	-28.7444	7.36647e-139	1.03207e-137	306.34	downregulate	11.671	7.926
MUC4	-5.26573	5.68535	-28.7418	7.69857e-139	1.0772e-137	306.296	downregulate	7.733	2.467
ZNF727	-2.94765	3.41798	-28.7339	8.81147e-139	1.23212e-137	306.161	downregulate	4.564	1.617
SELP	-3.23001	8.05559	-28.7283	9.69472e-139	1.35386e-137	306.066	downregulate	9.312	6.082
CYP4F11	-4.54588	5.72142	-28.7023	1.51352e-138	2.10679e-137	305.621	downregulate	7.489	2.943
RNF183	-3.40522	3.14772	-28.6941	1.73915e-138	2.41929e-137	305.482	downregulate	4.472	1.067
ARHGEF16	-3.22164	8.29521	-28.6934	1.75981e-138	2.44644e-137	305.47	downregulate	9.548	6.326
SPATA18	-3.14178	7.83796	-28.6761	2.36528e-138	3.28391e-137	305.175	downregulate	9.06	5.918
MAMDC2	-3.96473	8.06018	-28.6679	2.72324e-138	3.77602e-137	305.034	downregulate	9.602	5.637
NTN1	-3.13519	8.31892	-28.6311	5.1006e-138	7.04518e-137	304.407	downregulate	9.538	6.403
CP	-4.56858	8.46425	-28.5906	1.01872e-137	1.40081e-136	303.716	downregulate	10.241	5.672
TFCP2L1	-4.76458	8.96818	-28.5838	1.14388e-137	1.5709e-136	303.6	downregulate	10.821	6.056
MYL3	-3.56087	4.22864	-28.5725	1.38656e-137	1.90175e-136	303.408	downregulate	5.613	2.053
FGF14	-3.04215	5.72599	-28.5706	1.43339e-137	1.96472e-136	303.375	downregulate	6.909	3.867
DUOX2	-5.15114	6.11879	-28.5461	2.17846e-137	2.97648e-136	302.957	downregulate	8.122	2.971
AOC3	-3.19305	10.8415	-28.5441	2.25107e-137	3.07374e-136	302.924	downregulate	12.083	8.89
FAM83B	-4.71953	4.77365	-28.5216	3.3094e-137	4.50741e-136	302.539	downregulate	6.609	1.889
LMO3	-5.04757	7.21268	-28.494	5.29559e-137	7.19438e-136	302.069	downregulate	9.176	4.128
CRACR2B	-2.99456	7.88323	-28.49	5.6658e-137	7.69246e-136	302.002	downregulate	9.048	6.053
EVPL	-5.27468	8.19993	-28.4878	5.88526e-137	7.98539e-136	301.964	downregulate	10.251	4.977
ITGA8	-3.36412	8.38605	-28.4854	6.13754e-137	8.32244e-136	301.922	downregulate	9.694	6.33
FAM153A	-3.09317	3.51083	-28.4111	2.17829e-136	2.92607e-135	300.657	downregulate	4.714	1.621
ASPG	-4.4015	5.21671	-28.3701	4.38093e-136	5.85194e-135	299.959	downregulate	6.928	2.527
BCL2L10	-3.43753	3.84463	-28.3582	5.36181e-136	7.13559e-135	299.757	downregulate	5.181	1.744
AC007743.1	-3.08297	4.59515	-28.3403	7.2705e-136	9.66374e-135	299.453	downregulate	5.794	2.711
LRRN2	-3.28686	7.26595	-28.3311	8.50694e-136	1.13002e-134	299.296	downregulate	8.544	5.257
AMN	-4.63951	5.902	-28.3299	8.68755e-136	1.1533e-134	299.275	downregulate	7.706	3.067
LRP1B	-4.06482	4.45182	-28.3246	9.50933e-136	1.26084e-134	299.185	downregulate	6.033	1.968
PRDM16	-3.67053	7.03835	-28.3242	9.56735e-136	1.26775e-134	299.179	downregulate	8.466	4.795
PBLD	-2.99797	8.80032	-28.3113	1.19325e-135	1.5793e-134	298.958	downregulate	9.966	6.968
DES	-6.14008	8.96936	-28.3037	1.35683e-135	1.79348e-134	298.83	downregulate	11.357	5.217
AC002398.12	-4.35398	4.85967	-28.2933	1.61989e-135	2.13464e-134	298.653	downregulate	6.553	2.199
PCDH20	-4.26337	5.27601	-28.2756	2.18962e-135	2.88365e-134	298.351	downregulate	6.934	2.671
B3GNT3	-4.50794	6.11956	-28.2434	3.79121e-135	4.97764e-134	297.803	downregulate	7.873	3.365
RP11-7K24.3	-3.80113	4.4238	-28.243	3.82019e-135	5.01262e-134	297.796	downregulate	5.902	2.101
GRIK5	-3.52698	6.14702	-28.2284	4.89138e-135	6.39866e-134	297.549	downregulate	7.519	3.992
VWDE	-3.47031	3.98052	-28.1607	1.54888e-134	2.01635e-133	296.397	downregulate	5.33	1.86
NXNL2	-3.07413	3.03541	-28.1515	1.81245e-134	2.35663e-133	296.24	downregulate	4.231	1.157
ADRB1	-3.90189	5.15435	-28.1343	2.42998e-134	3.15384e-133	295.947	downregulate	6.672	2.77
CNN1	-4.47938	9.43658	-28.0722	6.98649e-134	9.02953e-133	294.893	downregulate	11.179	6.699
HYAL1	-3.2676	8.5665	-28.0629	8.18314e-134	1.05634e-132	294.735	downregulate	9.837	6.57
INPP5J	-3.85227	7.81104	-28.0463	1.08535e-133	1.3977e-132	294.452	downregulate	9.309	5.457
SCN3A	-3.12375	5.06484	-28.0284	1.46957e-133	1.88796e-132	294.15	downregulate	6.28	3.156
OSR1	-3.92261	6.2041	-28.0192	1.72063e-133	2.20655e-132	293.992	downregulate	7.73	3.807
CLIC5	-4.06993	8.82859	-28.0138	1.88356e-133	2.41262e-132	293.902	downregulate	10.411	6.341
ARHGAP8	-3.7671	7.19462	-28.0063	2.14106e-133	2.73919e-132	293.774	downregulate	8.66	4.892
WNT11	-3.08748	6.31895	-28.0006	2.35829e-133	3.00993e-132	293.677	downregulate	7.52	4.432
OR2A7	-3.12792	5.40568	-27.9989	2.42682e-133	3.09556e-132	293.649	downregulate	6.622	3.494
CDH22	-3.12134	3.21816	-27.9944	2.61906e-133	3.33681e-132	293.573	downregulate	4.432	1.311
LCN6	-2.95613	3.25643	-27.9708	3.91763e-133	4.98536e-132	293.17	downregulate	4.406	1.45
LRG1	-4.28655	7.85687	-27.8606	2.54574e-132	3.21107e-131	291.301	downregulate	9.524	5.237
GPR182	-3.02361	3.9471	-27.8428	3.44448e-132	4.32945e-131	290.999	downregulate	5.123	2.099
ABI3BP	-3.19852	9.98738	-27.8354	3.9026e-132	4.89669e-131	290.874	downregulate	11.231	8.033
RAB27B	-4.45246	7.18651	-27.8338	4.00827e-132	5.02635e-131	290.848	downregulate	8.918	4.466
NRXN1	-3.98096	4.56053	-27.7578	1.45727e-131	1.8121e-130	289.558	downregulate	6.109	2.128
LGR5	-3.79553	4.55983	-27.7502	1.65764e-131	2.05353e-130	289.43	downregulate	6.036	2.24
KCNJ3	-4.55308	4.06766	-27.7355	2.12553e-131	2.63013e-130	289.181	downregulate	5.838	1.285
COL28A1	-2.96723	5.71538	-27.7149	3.01802e-131	3.72807e-130	288.831	downregulate	6.869	3.902
ARHGAP6	-3.15158	8.20779	-27.7057	3.52424e-131	4.34588e-130	288.676	downregulate	9.433	6.282
EFCAB1	-4.00866	4.02479	-27.7018	3.76858e-131	4.63921e-130	288.609	downregulate	5.584	1.575
RNF212	-3.1964	5.56303	-27.7014	3.79291e-131	4.66649e-130	288.603	downregulate	6.806	3.61
ANO5	-3.3618	7.33985	-27.6947	4.24693e-131	5.21613e-130	288.49	downregulate	8.647	5.285
PTPRT	-4.16551	4.6713	-27.6741	6.02161e-131	7.37476e-130	288.141	downregulate	6.291	2.126
USP44	-2.99107	5.10291	-27.6558	8.2104e-131	1.00383e-129	287.831	downregulate	6.266	3.275
HBA2	-3.96124	9.74142	-27.6465	9.62603e-131	1.17623e-129	287.673	downregulate	11.282	7.321
SLC2A4	-3.00149	7.02456	-27.6358	1.15405e-130	1.40697e-129	287.491	downregulate	8.192	5.19
ADAMTS8	-3.94491	5.94589	-27.6305	1.26043e-130	1.5358e-129	287.403	downregulate	7.48	3.535
CD300LG	-4.03768	5.80393	-27.6261	1.35895e-130	1.65116e-129	287.328	downregulate	7.374	3.336
COL4A5	-3.70261	8.9347	-27.6103	1.77668e-130	2.15628e-129	287.06	downregulate	10.375	6.672
FAM153B	-3.22592	3.52838	-27.5906	2.48118e-130	3.00283e-129	286.727	downregulate	4.783	1.557
TNNC1	-4.42321	5.41104	-27.5615	4.06411e-130	4.90751e-129	286.234	downregulate	7.131	2.708
RP11-295M3.4	-3.61878	6.25463	-27.532	6.69651e-130	8.06356e-129	285.735	downregulate	7.662	4.043
FGF9	-4.23357	4.44126	-27.5255	7.46614e-130	8.97522e-129	285.626	downregulate	6.088	1.854
SLC15A2	-3.602	7.83409	-27.5146	8.98286e-130	1.07804e-128	285.442	downregulate	9.235	5.633
NTRK2	-3.94485	9.64314	-27.4571	2.37896e-129	2.84549e-128	284.469	downregulate	11.177	7.232
FMO5	-2.97965	8.65073	-27.3578	1.27529e-128	1.51276e-127	282.792	downregulate	9.809	6.83
MT1M	-3.58262	7.61193	-27.3577	1.27757e-128	1.51463e-127	282.79	downregulate	9.005	5.423
KCTD14	-3.20605	7.81255	-27.3525	1.39552e-128	1.65356e-127	282.702	downregulate	9.059	5.853
SLC6A20	-4.02776	4.22012	-27.3324	1.96088e-128	2.31453e-127	282.362	downregulate	5.786	1.759
CYP4F3	-5.04182	4.78832	-27.3215	2.35681e-128	2.77425e-127	282.178	downregulate	6.749	1.707
LTF	-5.12452	8.90652	-27.3114	2.79692e-128	3.28871e-127	282.007	downregulate	10.899	5.775
GALNT15	-3.04099	7.71645	-27.2907	3.97e-128	4.66042e-127	281.657	downregulate	8.899	5.858
PTH1R	-3.55943	7.13706	-27.2426	8.95014e-128	1.04496e-126	280.846	downregulate	8.521	4.962
ST6GAL2	-3.37049	6.06981	-27.2411	9.18049e-128	1.07069e-126	280.82	downregulate	7.381	4.01
SLC15A1	-4.30618	4.47158	-27.2227	1.25085e-127	1.45567e-126	280.511	downregulate	6.146	1.84
RHOD	-3.0317	8.38586	-27.2011	1.80153e-127	2.09313e-126	280.147	downregulate	9.565	6.533
PLIN4	-4.90677	8.01649	-27.0876	1.22484e-126	1.40787e-125	278.232	downregulate	9.925	5.018
PLN	-3.83392	7.41849	-27.0685	1.69e-126	1.93738e-125	277.911	downregulate	8.909	5.076
LIPH	-4.71575	7.20233	-27.0665	1.74796e-126	2.00169e-125	277.877	downregulate	9.036	4.32
SULT1C4	-3.19393	6.17182	-27.0629	1.85684e-126	2.12524e-125	277.817	downregulate	7.414	4.22
ANGPT4	-3.43291	3.74072	-26.9977	5.5729e-126	6.34803e-125	276.719	downregulate	5.076	1.643
HBA1	-3.88809	8.74896	-26.982	7.2695e-126	8.2631e-125	276.454	downregulate	10.261	6.373
ART4	-3.71985	5.02116	-26.9629	1.00273e-125	1.13678e-124	276.132	downregulate	6.468	2.748
KNDC1	-3.76034	5.52771	-26.9581	1.0878e-125	1.23257e-124	276.051	downregulate	6.99	3.23
STX19	-3.68384	3.77921	-26.8814	3.9575e-125	4.44439e-124	274.761	downregulate	5.212	1.528
TACR1	-3.35062	5.62515	-26.8688	4.88886e-125	5.48461e-124	274.55	downregulate	6.928	3.578
ARMC4	-3.56705	3.39701	-26.8505	6.65556e-125	7.43942e-124	274.242	downregulate	4.784	1.217
SLC18A2	-3.8265	4.35719	-26.8263	9.99936e-125	1.11423e-123	273.835	downregulate	5.845	2.019
SMOC1	-3.66391	6.80572	-26.7806	2.15753e-124	2.38928e-123	273.067	downregulate	8.231	4.567
ENPP6	-3.47816	4.79881	-26.7527	3.44964e-124	3.81037e-123	272.599	downregulate	6.151	2.673
LAMA3	-3.46302	9.42202	-26.7501	3.60649e-124	3.98158e-123	272.554	downregulate	10.769	7.306
ELN	-3.08339	9.99441	-26.7465	3.83258e-124	4.22685e-123	272.493	downregulate	11.194	8.11
PTCHD1	-4.22044	4.48763	-26.7341	4.71782e-124	5.19249e-123	272.286	downregulate	6.129	1.908
AC109642.1	-3.59974	4.40506	-26.7301	5.04601e-124	5.55087e-123	272.219	downregulate	5.805	2.205
SHH	-4.80071	4.39764	-26.7234	5.65039e-124	6.21254e-123	272.106	downregulate	6.265	1.464
KY	-3.50482	3.71588	-26.7012	8.20191e-124	8.99033e-123	271.734	downregulate	5.079	1.574
GPX2	-5.45463	5.8768	-26.6954	9.05412e-124	9.91941e-123	271.635	downregulate	7.998	2.543
CFB	-3.3847	10.6402	-26.6789	1.19448e-123	1.30531e-122	271.358	downregulate	11.956	8.572
PCK1	-6.9612	5.88443	-26.6776	1.22085e-123	1.33345e-122	271.336	downregulate	8.592	1.63
DUSP26	-3.29253	4.44257	-26.6564	1.7427e-123	1.89765e-122	270.981	downregulate	5.723	2.43
GADD45G	-2.96982	7.82912	-26.5074	2.12753e-122	2.27975e-121	268.482	downregulate	8.984	6.014
DOK6	-2.95765	6.23005	-26.4814	3.28933e-122	3.51417e-121	268.047	downregulate	7.38	4.423
MMP7	-5.28739	7.06721	-26.4612	4.61382e-122	4.90969e-121	267.709	downregulate	9.123	3.836
PON3	-4.03295	6.08985	-26.4591	4.78222e-122	5.08637e-121	267.673	downregulate	7.658	3.625
STAC	-3.35338	6.05076	-26.4546	5.15866e-122	5.48133e-121	267.597	downregulate	7.355	4.001
HSD17B2	-4.99354	5.32349	-26.4537	5.23965e-122	5.56463e-121	267.582	downregulate	7.265	2.272
GPT	-3.74083	6.57738	-26.4531	5.2864e-122	5.61152e-121	267.573	downregulate	8.032	4.291
IGFALS	-3.81369	4.40991	-26.4387	6.73487e-122	7.1385e-121	267.331	downregulate	5.893	2.079
C16ORF89	-4.65956	8.00582	-26.4358	7.06938e-122	7.48937e-121	267.282	downregulate	9.818	5.158
RPRM	-3.70796	3.70526	-26.4051	1.18347e-121	1.24886e-120	266.768	downregulate	5.147	1.439
BAI3	-3.00735	5.0705	-26.3545	2.7621e-121	2.90048e-120	265.921	downregulate	6.24	3.233
OLFM4	-5.83969	4.8719	-26.3349	3.8373e-121	4.01973e-120	265.593	downregulate	7.143	1.303
MAB21L3	-3.34777	3.46772	-26.2912	7.96899e-121	8.3114e-120	264.863	downregulate	4.77	1.422
AQP3	-4.21104	10.521	-26.2855	8.77057e-121	9.13414e-120	264.767	downregulate	12.159	7.948
LCN12	-3.47652	4.62295	-26.2661	1.21355e-120	1.25958e-119	264.443	downregulate	5.975	2.498
LEFTY2	-3.51205	3.6777	-26.2638	1.26179e-120	1.30902e-119	264.404	downregulate	5.043	1.531
TREH	-3.67674	3.7996	-26.2158	2.81572e-120	2.9071e-119	263.603	downregulate	5.229	1.553
TRIM55	-3.85159	3.75009	-26.1595	7.22096e-120	7.402e-119	262.662	downregulate	5.248	1.396
CCSER1	-2.9661	5.90897	-26.1511	8.31032e-120	8.51056e-119	262.522	downregulate	7.062	4.096
FLRT3	-3.79745	8.59429	-26.1457	9.08727e-120	9.3018e-119	262.432	downregulate	10.071	6.274
GFRA1	-3.31787	8.98899	-26.1298	1.18591e-119	1.21217e-118	262.166	downregulate	10.279	6.961
DIRAS2	-3.13005	3.85977	-26.1175	1.45704e-119	1.4879e-118	261.961	downregulate	5.077	1.947
BCAS1	-4.273	6.44743	-26.1141	1.54083e-119	1.57271e-118	261.905	downregulate	8.109	3.836
GPR133	-3.21221	8.00975	-26.1051	1.79298e-119	1.82662e-118	261.754	downregulate	9.259	6.047
JPH2	-3.70714	7.01035	-26.0937	2.16925e-119	2.2089e-118	261.563	downregulate	8.452	4.745
PCDHA12	-3.83972	4.49043	-26.0826	2.60975e-119	2.65368e-118	261.379	downregulate	5.984	2.144
VSNL1	-3.69482	5.9793	-26.0811	2.67526e-119	2.719e-118	261.354	downregulate	7.416	3.721
HPD	-5.26137	4.95334	-26.0632	3.61126e-119	3.66338e-118	261.054	downregulate	6.999	1.738
RNF128	-3.9511	8.57078	-25.9623	1.94584e-118	1.95548e-117	259.372	downregulate	10.107	6.156
PROM1	-4.03849	8.3896	-25.9622	1.94928e-118	1.95802e-117	259.371	downregulate	9.96	5.922
CRHBP	-3.55544	5.68237	-25.9485	2.44739e-118	2.45264e-117	259.143	downregulate	7.065	3.51
FAM84A	-3.11536	8.45905	-25.8984	5.64597e-118	5.63444e-117	258.308	downregulate	9.671	6.555
ESR1	-2.96789	8.10911	-25.8715	8.85047e-118	8.79973e-117	257.86	downregulate	9.263	6.295
GDF7	-3.23968	6.03494	-25.8299	1.76923e-117	1.75503e-116	257.168	downregulate	7.295	4.055
G0S2	-3.15801	8.68256	-25.8046	2.69513e-117	2.66981e-116	256.747	downregulate	9.911	6.753
SGK2	-4.0015	6.2815	-25.7751	4.40961e-117	4.35214e-116	256.256	downregulate	7.838	3.836
CASQ2	-3.18511	6.65062	-25.7619	5.49094e-117	5.41441e-116	256.037	downregulate	7.889	4.704
SFTPD	-4.95349	5.33033	-25.7589	5.76861e-117	5.68559e-116	255.987	downregulate	7.257	2.303
DCHS2	-3.31511	4.44102	-25.7148	1.20243e-116	1.17865e-115	255.254	downregulate	5.73	2.415
SLC27A6	-4.09293	3.96952	-25.7109	1.28187e-116	1.25537e-115	255.19	downregulate	5.561	1.468
MYOC	-4.64719	4.99267	-25.7099	1.30497e-116	1.27741e-115	255.172	downregulate	6.8	2.153
RND1	-3.00803	7.28324	-25.6855	1.9587e-116	1.91211e-115	254.767	downregulate	8.453	5.445
SHISA9	-3.74484	4.00739	-25.6814	2.09477e-116	2.04217e-115	254.7	downregulate	5.464	1.719
PTGFR	-2.95577	6.61197	-25.6774	2.23812e-116	2.17994e-115	254.633	downregulate	7.761	4.806
HOOK1	-3.16673	9.10004	-25.6707	2.5057e-116	2.43945e-115	254.521	downregulate	10.332	7.165
SYN2	-3.57832	4.93119	-25.669	2.57431e-116	2.50512e-115	254.494	downregulate	6.323	2.744
TMPRSS4	-5.39673	5.50517	-25.6309	4.85665e-116	4.71119e-115	253.86	downregulate	7.604	2.207
GRAMD2	-3.8965	6.11237	-25.6155	6.27326e-116	6.07715e-115	253.604	downregulate	7.628	3.731
SLC1A2	-3.43525	5.53358	-25.5909	9.44208e-116	9.11815e-115	253.196	downregulate	6.87	3.434
EFHC2	-3.17851	5.16533	-25.5485	1.90686e-115	1.83403e-114	252.494	downregulate	6.401	3.223
CA2	-3.86722	9.63426	-25.5372	2.30253e-115	2.21063e-114	252.306	downregulate	11.138	7.271
TMEM130	-3.63992	5.36222	-25.5335	2.4466e-115	2.3479e-114	252.245	downregulate	6.778	3.138
GLRB	-3.11423	6.39915	-25.5154	3.30823e-115	3.16771e-114	251.944	downregulate	7.61	4.496
PAPPA	-2.99769	7.14636	-25.4991	4.33557e-115	4.14772e-114	251.674	downregulate	8.312	5.314
COL4A4	-3.18639	8.19836	-25.4283	1.40272e-114	1.33246e-113	250.501	downregulate	9.438	6.251
CHRDL1	-4.27276	9.21325	-25.3881	2.7335e-114	2.58744e-113	249.835	downregulate	10.875	6.602
PTN	-3.45262	8.72427	-25.3621	4.20436e-114	3.97097e-113	249.405	downregulate	10.067	6.614
LCN2	-5.1709	7.1065	-25.3116	9.70403e-114	9.13725e-113	248.57	downregulate	9.117	3.947
SLC51B	-3.85167	3.66418	-25.2829	1.56134e-113	1.46758e-112	248.095	downregulate	5.162	1.31
MUC6	-4.70884	4.22256	-25.2724	1.85665e-113	1.74363e-112	247.922	downregulate	6.054	1.345
VTCN1	-5.06967	5.25525	-25.2479	2.78707e-113	2.60717e-112	247.516	downregulate	7.227	2.157
KCNJ15	-4.47433	7.98011	-25.2405	3.14875e-113	2.93911e-112	247.394	downregulate	9.72	5.246
TNNT2	-3.76239	4.10676	-25.2181	4.5632e-113	4.25016e-112	247.024	downregulate	5.57	1.808
DOK7	-2.9775	5.351	-25.1636	1.12268e-112	1.04116e-111	246.125	downregulate	6.509	3.531
RELN	-3.29365	7.55255	-25.1535	1.32833e-112	1.22869e-111	245.957	downregulate	8.833	5.54
PPP1R1B	-5.06798	7.17562	-25.0765	4.73711e-112	4.35928e-111	244.687	downregulate	9.147	4.079
VIP	-3.34971	3.16195	-25.0506	7.27204e-112	6.67203e-111	244.259	downregulate	4.465	1.115
LGALS4	-5.03033	5.46141	-25.0491	7.44608e-112	6.8288e-111	244.235	downregulate	7.418	2.387
SYT1	-3.25569	6.04715	-24.9098	7.41171e-111	6.70014e-110	241.94	downregulate	7.313	4.058
OVOL1	-4.34589	5.97549	-24.8064	4.07e-110	3.63645e-109	240.24	downregulate	7.666	3.32
TARID	-3.26601	3.53492	-24.7989	4.60382e-110	4.10659e-109	240.117	downregulate	4.805	1.539
CNTN3	-3.04249	6.36236	-24.7757	6.74405e-110	5.99825e-109	239.735	downregulate	7.546	4.503
CCL15-CCL14	-4.08905	5.00205	-24.7711	7.2708e-110	6.46407e-109	239.66	downregulate	6.592	2.503
SPINT1	-3.13801	10.942	-24.7658	7.93023e-110	7.04742e-109	239.574	downregulate	12.162	9.024
GPC3	-3.18387	9.37861	-24.7538	9.66339e-110	8.57347e-109	239.376	downregulate	10.617	7.433
ENTPD8	-3.92178	4.1297	-24.7502	1.02634e-109	9.10206e-109	239.316	downregulate	5.655	1.733
FAT3	-3.51326	4.98594	-24.7115	1.93952e-109	1.70948e-108	238.681	downregulate	6.352	2.839
SHISA3	-4.02665	5.47473	-24.6912	2.70725e-109	2.37738e-108	238.348	downregulate	7.041	3.014
CCDC85A	-2.96892	6.01932	-24.6807	3.21469e-109	2.81954e-108	238.176	downregulate	7.174	4.205
PTGS2	-3.30937	8.33094	-24.6762	3.46149e-109	3.03229e-108	238.102	downregulate	9.618	6.309
RP11-728F11.4	-3.40989	3.66127	-24.604	1.13309e-108	9.87369e-108	236.918	downregulate	4.987	1.577
FOXJ1	-4.04774	4.9715	-24.5942	1.33029e-108	1.15827e-107	236.758	downregulate	6.546	2.498
TENM2	-3.55631	5.99457	-24.5609	2.29687e-108	1.99421e-107	236.212	downregulate	7.378	3.821
CPA3	-4.24677	6.51881	-24.4896	7.39758e-108	6.38156e-107	235.044	downregulate	8.17	3.924
CPNE4	-3.3686	3.39563	-24.4563	1.27649e-107	1.09502e-106	234.5	downregulate	4.706	1.337
GPR98	-3.32115	7.28059	-24.3357	9.1913e-107	7.80063e-106	232.528	downregulate	8.572	5.251
GPIHBP1	-2.96162	7.27733	-24.2715	2.62511e-106	2.21221e-105	231.481	downregulate	8.429	5.467
FAR2P2	-3.16214	5.98315	-24.2023	8.12253e-106	6.78908e-105	230.353	downregulate	7.213	4.051
AQP4	-4.99988	5.92042	-24.1399	2.24905e-105	1.86749e-104	229.336	downregulate	7.865	2.865
XDH	-4.56141	5.36923	-24.1393	2.27085e-105	1.88486e-104	229.326	downregulate	7.143	2.582
LIPC	-3.35775	5.45987	-24.0873	5.30098e-105	4.37799e-104	228.48	downregulate	6.766	3.408
PIFO	-3.05901	7.01118	-24.0652	7.60432e-105	6.26824e-104	228.119	downregulate	8.201	5.142
AC079630.4	-3.03846	5.1479	-24.0514	9.51541e-105	7.84055e-104	227.896	downregulate	6.33	3.291
PDE1C	-3.2018	6.8339	-24.0083	1.91995e-104	1.57658e-103	227.195	downregulate	8.079	4.877
CACNA2D2	-3.37432	7.52687	-23.9591	4.2761e-104	3.48869e-103	226.395	downregulate	8.839	5.465
IHH	-4.13419	4.22199	-23.9464	5.25668e-104	4.27734e-103	226.189	downregulate	5.83	1.696
RASEF	-3.28992	8.59597	-23.9181	8.32906e-104	6.75688e-103	225.729	downregulate	9.875	6.585
BBOX1	-4.80825	5.65621	-23.9166	8.53235e-104	6.91918e-103	225.705	downregulate	7.526	2.718
CLDN16	-3.99141	4.33495	-23.8879	1.35996e-103	1.09993e-102	225.24	downregulate	5.887	1.896
SLITRK4	-3.01534	5.79992	-23.8498	2.52806e-103	2.03399e-102	224.621	downregulate	6.973	3.957
STYK1	-3.32457	5.10664	-23.8407	2.9276e-103	2.3528e-102	224.474	downregulate	6.4	3.075
CTNND2	-3.35362	5.05405	-23.8315	3.40288e-103	2.73272e-102	224.324	downregulate	6.358	3.005
MS4A2	-3.63254	4.53845	-23.8215	3.99922e-103	3.20564e-102	224.163	downregulate	5.951	2.319
ADH6	-4.67677	4.14665	-23.7646	1.00777e-102	8.01814e-102	223.24	downregulate	5.965	1.289
PRLR	-3.64662	7.64211	-23.7508	1.25988e-102	9.99817e-102	223.017	downregulate	9.06	5.414
TFF3	-4.22197	8.0533	-23.6929	3.21835e-102	2.54089e-101	222.081	downregulate	9.695	5.473
AREG	-3.98614	6.68488	-23.682	3.841e-102	3.03025e-101	221.904	downregulate	8.235	4.249
VWA3B	-3.16316	3.19086	-23.6643	5.11814e-102	4.03042e-101	221.618	downregulate	4.421	1.258
MST1L	-3.07808	6.64494	-23.61	1.23176e-101	9.62933e-101	220.741	downregulate	7.842	4.764
FOXA1	-5.25097	6.03099	-23.6051	1.33404e-101	1.04213e-100	220.661	downregulate	8.073	2.822
SPTSSB	-3.70792	4.64088	-23.5905	1.69016e-101	1.31889e-100	220.425	downregulate	6.083	2.375
LIPG	-3.24528	7.79843	-23.5779	2.06993e-101	1.61289e-100	220.222	downregulate	9.06	5.815
IGSF10	-3.20588	7.42117	-23.5777	2.07942e-101	1.61971e-100	220.218	downregulate	8.668	5.462
PTGER3	-3.68938	7.95587	-23.5141	5.81493e-101	4.4968e-100	219.191	downregulate	9.391	5.701
ABCA8	-3.35115	9.24438	-23.4933	8.12838e-101	6.27455e-100	218.857	downregulate	10.548	7.196
RSPO1	-3.58822	4.14158	-23.4829	9.62092e-101	7.4187e-100	218.688	downregulate	5.537	1.949
MALL	-2.97108	10.1994	-23.4396	1.93574e-100	1.48678e-99	217.99	downregulate	11.355	8.384
EPHA10	-3.06455	4.32021	-23.4071	3.27084e-100	2.49797e-99	217.467	downregulate	5.512	2.447
RP11-482H16.1	-3.15153	4.75741	-23.3992	3.71005e-100	2.83038e-99	217.341	downregulate	5.983	2.831
TNNI1	-3.32405	5.79525	-23.3418	9.37196e-100	7.11198e-99	216.416	downregulate	7.088	3.764
PKP3	-4.14885	7.98569	-23.3325	1.08858e-99	8.24914e-99	216.266	downregulate	9.599	5.45
RASSF10	-3.3427	5.05025	-23.3108	1.54277e-99	1.16745e-98	215.918	downregulate	6.35	3.007
C6ORF141	-3.01683	4.22449	-23.3015	1.79284e-99	1.35477e-98	215.768	downregulate	5.398	2.381
CTAGE4	-3.11891	6.58532	-23.2017	8.92371e-99	6.68455e-98	214.166	downregulate	7.798	4.679
MSLN	-4.57123	5.35334	-23.1967	9.66983e-99	7.23841e-98	214.086	downregulate	7.131	2.56
PALM3	-3.53417	6.35761	-23.1871	1.12964e-98	8.44419e-98	213.93	downregulate	7.732	4.198
TIMP4	-3.11691	5.71349	-23.1845	1.17825e-98	8.80451e-98	213.888	downregulate	6.926	3.809
SMIM5	-3.08907	6.55622	-23.1222	3.20234e-98	2.38551e-97	212.89	downregulate	7.758	4.668
CYP17A1	-3.68789	3.74476	-23.1207	3.28217e-98	2.44412e-97	212.865	downregulate	5.179	1.491
DIO1	-4.58124	4.25168	-23.0304	1.39594e-97	1.03236e-96	211.42	downregulate	6.033	1.452
KLRG2	-3.62216	4.131	-22.9458	5.41655e-97	3.98251e-96	210.067	downregulate	5.54	1.917
PI16	-4.11902	7.21159	-22.9453	5.45852e-97	4.01199e-96	210.059	downregulate	8.813	4.694
[truncated: 154 more rows]
